# Supplementary material
Source: PubMed Central journal article supplement (PMC2783191)
Supplement: NIHMS109486-supplement-Supplementary.pdf [file NIHMS109486-supplement-Supplementary.pdf]

## Supplemental Figure Legends

### **Figure S\_1** – Northern blot probes.

A list of oligonucleotide sequences used to probe northern blots for mouse tRNA families.

Sequences are written 5'-3' and are complementary to the tRNA mature regions.

### **Figure S\_2** – Alignments of the mouse tRNA gene families.

All of the genes in the 35 mouse tRNA families were aligned using ClustalW. Only the mature coding regions and introns (when present) are shown. Mature tRNA sequences are more conserved than the 5' and 3' flanking regions or the introns, although even the mature regions are not as conserved as those in yeast.

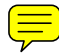

### **Figure S\_3** – Set of verified mouse tRNA genes.

446 tRNA genes correspond to the expressed tRNA sequences as confirmed by the microarray analysis. The verified genes are listed with their tRNA gene names, chromosomal location, tRNA gene family, amino acid type, anticodon, presence of an intron, whether the gene is a 'rogue' and the tRNA gene sequence.

### **Figure S\_4** – Set of predicted human tRNA genes.

We sorted the set of predicted tRNA genes using ClustalW and then assigned the genes into families. All of the mouse tRNA gene families had corresponding human families.

### **Figure S\_5** – Northern blot confirmation of predicted tRNA gene families.

We confirmed the expression of tRNA-sized RNAs in RNA samples from four mouse tissues and RNA from actively growing human tissue culture cells (HeLa). The probe sequences are listed in Figure S\_1.

**Figure S\_6** – Predicted structures of the single-copy “orphan” pre-tRNAs that contain introns. There are six intron-containing orphan tRNAs that are detected as expressed by the microarray analysis. However, the intron location of five of seven of the tRNA genes is not consistent with intron locations in yeast, only tF(GAA)O and tP(AGG)P are consistent with yeast. The intron size and insertion location is indicated with an arrow.

**Figure S\_7** – Mouse orphan tRNA<sup>Tyr</sup> gene corresponds to a multi-gene tRNA<sup>Tyr</sup> family in humans.

An orphan mouse tRNA gene, tY(GTA)B, which exists as a single copy in the mouse genome, corresponds to a probably human tRNA gene with 20 copies. This mouse tRNA gene was detected by only ARAGORN and the 20 human homologues were not detected by tRNAscan-SE. This alignment shows the homology between the mouse gene (shown above) and the 20 human homologues (>90% homology).

Supplemental Figure S1

Mouse tRNA Family Probe Sequence (5'-3')

Ala1 GCG CTC TAC CAC TGA GCT ACA CC  
Ala2 GCT CTA CCA CTG AGC TAA ATC C  
Ala3 GCG CTC TAC CAT TTG AGC TAA TCC  
Arg1 CGA ACC CTT AAT CTT CTG ATC CG  
Arg2 GGA GGC CAA TGC CTT ATC CAT TAG G  
Asn GGC TCG AAC CAC CTA CCT TTC GGT  
Asp GTG ACA GGC GGG GAT ACT CAC C  
Cys CCT GCT GAT CTG TAG TCA AAT GCT C  
Gln CGC TGG ATT CAG AGT CCA GAG TGC  
Glu1 GCG CCG AAT CCT AAC CAC TAG ACC A  
Glu2 GGC CGC CTG GGT GAA AAC CAG G  
Gly1 GTG GGA GGC GAG AAT TCT ACC ACT GAA  
Gly2 GAA GGC AGC TAT GCT TAC CAC TAT A  
Gly3 CGC AAG AAT GGG AAT CTT GCA TGA T  
His CCT AGG TTG CTG CGG CCA CAA CG  
Ile1 CCT TGG CGT TAT TAG CAC CAC GCT C  
Ile2 GGT GAG GCT CGA ACT CAC AAC CTC GGC  
Leu1 CCG TAG AGA CTG GAG CCT TAA TCC  
Leu2 CCT CCA GTG GAG ACT GCG ACC TG  
Leu3 CCA ACG CCT TAA CCA CTC AGC CAT CC  
Lys1 CCT GAG ATT AAG AGA CTC TTG CTC  
Lys2 CAG ATT AAA AGT CTG ATG CTC TAC C  
Met1 CTG GGT TAT GGG ACC AGC ACG C  
Met2 TGC GCT GCC TAC TAT GCT AAG G  
Met3 CGC GCT ACC TAC TGC GCT AAC G  
Phe AGA TCT TCA GTC TAA CGC TCT CC  
Pro1 CCT CTC GCA CCC TAA GCG AGA ATC  
Pro2 GTG AGA ATC ATA CCC CTA GAC CAA CAA GC  
Ser1 GGG ATA CCC CAA TGG ATT TCT AG  
Ser2 CCA TCG CCT TAA CCA CTC GGC CAC CTC G  
Thr1 GCT GGG ATT CGA ACC CAT GAT CTC CTG  
Thr2 CGA GAC CGA CGC CTT ACC ACT TGG  
Trp CTG GAG TCA GAC GTG CTA CCA TTG  
Tyr CAG TCC TCC GCT CTA CCA ACT GAG C  
Val1 CGA ACG TGA TAA CCA CTA CAC TAC GG  
Val1 CCG GTT TCG AAC CGG TGA CCT TTC GC  
Val2 CCT GCA TGT GAG GCG AGC GAT CAC CAC

Alanine<sub>1</sub>

|             | 1                                                                                                                                                             | 25 | 50 | 79 |
|-------------|---------------------------------------------------------------------------------------------------------------------------------------------------------------|----|----|----|
| tA(TGC)I    | - G G G G A T G T A G C T C A G T G G C A G A G T G C A T A C T T T G C A T G T A T G A G T T A C C T G G G - T G A A A A C T C C A G T A T C T C C A - - - - |    |    |    |
| tA(AGC)M6   | T G G G G A T G T A G C T C A G T G G T A G A G C G C A T G C T T A G C A T G C A T G A G G T - C C A G G G - T T C G A T C C C C A G C A T C T C C A G G C A |    |    |    |
| tA(TGC)E1   | - G G G G A T G T A G C T C A G T G G T A G A G C G C A T G C T T T G C A T G T A T G A G G C - C C C A G G - T T C G A T C C C C G G C A T C T C C A C C A - |    |    |    |
| tA(TGC)E2   | - G G G G A T G T A G C T C A G T G G T A G A G C G C A T G C T T T G C A T G T A T G A G G C - C C C A G G - T T C A A T C C C C G G C A T C T C C A A C A - |    |    |    |
| tA(AGC)M3   | - G G G G G T G T A G C T C A G T G G T A G A G C G C G T G C T T A G C A T G C A C G A G G C - C C C A G G - T T C A A T C C C C G G C A C C T C C A G T A - |    |    |    |
| tA(AGC)M4   | - G G G G G T G T A G C T C A G T G G T A G A G C G C G T G C T T A G C A T G C A C G A G G C - C C C A G G - T T C A A T C C C C G G C A C C T C C A G T A - |    |    |    |
| tA(AGC)M5   | T G G G G G T G T A G C T C A G T G G T A G A G C G C G T G C T T A G C A T G C A C G A G G C - C C A G G G - T T C G A T C C C C A G C A C C T C C A T T C A |    |    |    |
| tA(TGC)M    | - G G G G G T G T A G C T C A G T G G T A G A G C G C A T G C T T T G C A T G C A T G A G G C - C C C A G G - T T C G A T C C C C G G C A C C T C C A C T A - |    |    |    |
| tA(CGC)M1   | - G G G G A T G T A G C T C A G T G G T A G A G C G C A T G C T T C G C A T G T A T G A G G C - C C C A G G - T T C G A T C C C C G G C A T C T C C A A G A - |    |    |    |
| tA(CGC)B    | - G G G G A T G T A G C T C A G T G G T A G A G C G C G C G C T T C G C A T G T G T G A G G T - C C C A G G - T T C A A T C C C C G G C A T C T C C A A G A - |    |    |    |
| tA(CGC)M2   | T G G G G A T G T A G C T C A G T G G T A G A G C G C A T G C T T C G C A T G T A T G A G G C - C C A G G G - T T C G A T C C C C G G C A T C T C C A G T T A |    |    |    |
| tA(TGC)K    | T G G G G A T G T A G C T C A G T G G T A G A G C G C A T G C T T T G C A T G T A T G A G G C - C C A G G G - T T C G A T C C C C G G C A T C T C C A A A C A |    |    |    |
| tA(TGC)X4   | T G G G G A T G T A G C T C A G C G G T A G A G C A C A T G C T T T G C A T G T A T G G G G T - C C A G G G - T T C G A T T C C C G G C A T C T C C A C A G A |    |    |    |
| tA(TGC)X6   | T G G G G A T G T A G C T C A G C G G T A G A G C A C A T G C T T T G C A T G T A T G G G G T - C C A G G G - T T C G A T T C C C G G C A T C T C C A C A G A |    |    |    |
| tA(TGC)X1 4 | T G G G G A T G T A G C T C A G C G G T A G A G C A C A T G C T T T G C A T G T A T G G G G T - C C A G G G - T T C G A T T C C C G G C A T C T C C A G A G A |    |    |    |
| tA(TGC)X2   | T G G G G A T G T A G C T C A G T G G T A G A G C A C A T G C T T T G C A T G T A T G G G G T - C C A G G G - T T C A A T T C C C G G C A T C T C C A G A G A |    |    |    |
| tA(TGC)X1 0 | T G G G G A T G T A G C T C A G T G G T A G A G C A C A T G C T T T G C A T G T A T G G G G T - C C A G G G - T T C G A T T C C C G G C A T C T C C A A T G A |    |    |    |
| tA(TGC)X1 2 | T G G G G A T G T A G C T C A G T G G T A G A G C A C A T G C T T T G C A T G T A T G G G G T - C C A G G G - T T C G A T T C C C G G C A T C T C C A A T G A |    |    |    |
| tA(CGC)X3   | T G G G G A T G T A G C T C A G A G G T A G A G C A C A T G C T T C G C A T G T G T G T G G T - C C A G G G - T T C G A C T C C C G G C A T C T C C A G A G A |    |    |    |
| tA(CGC)X5   | T G G G G A T G T A G C T C A G A G G T A G A G C A C A T G C T T C G C A T G T G T G T G G T - C C A G G G - T T C G A C T C C C G G C A T C T C C A G A G A |    |    |    |
| tA(CGC)X7   | T G G G G A T G T A G C T C A G A G G T A G A G C A C A T G C T T C G C A T G T G T G T G G T - C C A G G G - T T C G A C T C C C G G C A T C T C C A G A G A |    |    |    |
| tA(CGC)X9   | T G G G G A T G T A G C T C A G A G G T A G A G C A C A T G C T T C G C A T G T G T G T G G T - C C A G G G - T T C G A C T C C C A G C A T C T C C A G A G A |    |    |    |
| tA(CGC)X1   | T G G G G T T G T A G C T C A G A G G T A G A G C A C A T G C T T C G C A T G T G T G T G G T - C C A G G G - T T C G A T T C C C G G C A T C T C C A G A G A |    |    |    |
| tA(CGC)X1 1 | T G G G G A T G T A G C T C A G A G G T A G A G C A C G T G C T T C G C A T G T G T G T G G T - C C A G G G G T T C G A T T C C C G G C A T C T C C A G G G A |    |    |    |
| tA(TGC)X1 6 | T G G G G A T G T A G C T C A A T G G T A G A G C A C A T G C T T T G C A T G T A T G A G G C - A C A G G G - T T C G A T T C C C G G C A T C T C C A G G G A |    |    |    |
| tV(TAC)X1   | T G G A G G T G T A G C T C A A T G T C A G A G C T C T T G A T T T A C A T G T A T G G G G T - T C A G G G - T T C G A T T T C T G G C A T T T C C A G A T A |    |    |    |
| tA(TGC)X8   | T G G A A G T G T A G T T C A A T G G T A G A A C C C T T G T T T T G C A T A T A T G G G G T - T C A G G G - T T C G G T T C C T G G C A C C A C T A G G T A |    |    |    |

Alanine<sub>2</sub>

|           | 1                                                                                                                                                             | 25 | 50 | 79 |
|-----------|---------------------------------------------------------------------------------------------------------------------------------------------------------------|----|----|----|
| tA(AGC)B4 | - T C A G G G A T T T A G C T C A G T G G T A G A G C G - - - C T T G C C T A G C A A G T G C A A G G C C C T G G G T T C G G T C C T C A G C T C T G A A - - |    |    |    |
| tA(AGC)I6 | - T T G G G G A T T T A G C T C G G T G G T A G A G C G - - - C T T G C C T A G C A A G T G C A A G G C C C T G G G T T C G G T C C T C A G C T C T G A A - - |    |    |    |
| tA(AGC)J1 | - T T G G G G A T T T A G C T C A G T G G T A G A G C A - - - C T T G C C T A G C A A G T G C A A G G C C C T G G G T T C G G T C C T C A G C T C T G A A - - |    |    |    |
| tA(AGC)X  | - T T G G G G A T T T A G C T C A G T G G T A G A G C A - - - C T T G C C T A G C A A G A G C A A G G C C C T G G G T T T G G T C C T C A G C C C T G A A - - |    |    |    |
| tV(AAC)H  | - T T G G G G A T T T A G C T C A G T G G T A G A G C G - - - C T T G C C T A A C A A A A G C A A G G C T C T G G G T T C G G T C C T C A G C T C T G A A - - |    |    |    |
| tA(AGC)K4 | - T T G G G G A T T T A G C T C A G T G G T A G A G C G - - - C T T G C C T A G C A A A C T C A A G G C T C T G A G T T C G G G C C T C A G T T C T T T A A A |    |    |    |
| tA(AGC)G4 | - T T G G A G A T T T A G C T C A G T G G T A G A G C A - - - C T T G C C T A G C A A G C C C A A G G C C C T G A G T T C G G T C C T C A G C T C T G A A - - |    |    |    |
| tA(AGC)L2 | - T T G G G G A T T T A G C T C A G T G G T A G A G C A - - - C T T G C C T A G C A A G C A C A A G G C C C T G G G T T C G G T T C T C A G C T C T G A A - - |    |    |    |
| tA(AGC)F4 | - - - G G G A T T T A G C T C A G T G G T A G A G C G C T G C T T G C C T A G C A A G C A C A A G G C C C T G G G T T C G G T C C T C A G C T C T T G - - -   |    |    |    |
| tA(AGC)H1 | - - - - G G A T T T A G C T C A G T G G T A G A G C G - - - C T T G C C T A G C A A G C A C A A G G C C C T G G G T T C G G T C C T C A G C T C T G - - - -   |    |    |    |
| tA(AGC)J4 | - - - - A G A A A T A G C T C A G T G G T A G A G C G - - - C T T G C C T A G C A A G C A C A A G G C C C T G G G T T C G G T C C T C A G C T C T G - - - -   |    |    |    |
| tA(AGC)A3 | - T T G G G G A T T T A G C T C A G T G G T A G A G C G - - - C T T G C C T A G C A A G C A C A A G G C C C T G G G T T C G G T C C T C A G C T C T G A A - - |    |    |    |
| tA(AGC)E7 | - T T G G G G A T T T A G C T C A G A G G T A G A G A G C - G C T T G C T T A G C A A G C A C A A G G T C C T G G G T T C G A T C C T C A G C T C T G A A - - |    |    |    |
| tA(AGC)O3 | - T T G G G G A T T T A G C T C A G T G G T A G A G C A - - - C T T G C C T A G C A A G C A C A A G G C C C T G G G T T C A G T C C T C A G C T C T G A A - - |    |    |    |
| tA(AGC)P  | - T T G G G G A T T T A A C T C A G T G G T A G A G C A - - - C T T G C C T A G C A A G C A C A A G G C C C T G G G T T C A G T C C T C A G C T C T G A A - - |    |    |    |
| tA(AGC)F5 | - T T G G G G A C T T A G C T C A G T G G T A G A G C A - - - G T T G C C T A G C A A G C A C A A G G C C C T G G G T T C A G T C C T C A G C T C T G A A - - |    |    |    |
| tA(AGC)J5 | - T T G G G G A T T T A G C T C A G T G G T A G A G C G - - - C T C A C C C A G C A A G C A A A A G G C C C T G G G T T C A G T C C T C A G C T C T G A A - - |    |    |    |
| tA(AGC)O1 | - T T G G G G A T T T A G C T C A G T G G T A G A G C A - - - C T T G C C C A G C A A G C A C A A G G C T - T G G G T T C A G T C C T C A G C T C T G A A - - |    |    |    |
| tA(AGC)O2 | T T T G G G G A T T T A G C T C A G T G G T A G A G C G - - - T T T G C C T A G C A A G C A C A A G G C C T T G G G T T C A G T C C T C A G C T C T A G A A - |    |    |    |
| tG(ACC)X1 | - T T G G G G A T T T A G C T C A G T G G T A G A G C G - - - T T - G C C T A C C A A G C A C A A G G C C C T G G G T T C A G T C C T C A G C T C T G G A A A |    |    |    |
| tA(AGC)I2 | - T T G G G G A T T T A G C T C A G T G G T A G A G C G - - - C T T G C C T A G C A A G C A C A A G G C C C T G G G T T C A G T C C T C A G C T C T G A A - - |    |    |    |
| tA(AGC)G3 | - T T G G G G A T T T A G C T C A G T G G T A G A G T G - - - C G T G C C T A G C A A G C A C A A G G C C C T G G G T T C T G T C C T C A G C T C T G A A - - |    |    |    |
| tA(AGC)S4 | - T T G G G G A T T T A G C T C A G T G G T A G A G C A - - - C T T G T C T A G C A A G C A C A A G G C C T T G G G T T C G G T C C T C A G C T C C A A A - - |    |    |    |
| tA(AGC)L3 | - - - G G G G A T T T A G C T A A G T G G T A G A G T G - - - C T T G C T T A G C A A G T A C A A G G C A C T G A G T T C G A T C C T C A G C C C C A - - - - |    |    |    |
| tA(AGC)Q1 | - - - G G G G A T T T A G C T C A G T G G T A G A G C G - - - - T G C C T A G C A A G C A C A A G G C C C T G G G T T C T A T C C T C A G C T C C A - - - -   |    |    |    |

Alanine<sub>3</sub>

|             | 1                                                                                                                                                           | 25 | 50 | 78 |
|-------------|-------------------------------------------------------------------------------------------------------------------------------------------------------------|----|----|----|
| tA(AGC)M7   | - G G G G G A T T A G C T C A A A T G G T A G A G C G C T C G C T T A G C A T G C G A G A G G T A G A G G G A T C G A T G C C C A C A T C C T C C A G T A - |    |    |    |
| tA(AGC)M8   | - G G G G G A T T A G C T C A A A T G G T A G A G C G C T C G C T T A G C A T G C G A G A G G T A G A G G G A T C G A T G C C C A C A T C C T C C A G T A - |    |    |    |
| tA(AGC)C1   | - G G G G G A T T A G C T C A A A T G G T A G A G C G C T C G C T T A G C A T G C G A G A G G T A G A G G G A T C G A T G C C C G C A T C C T C C A G T A - |    |    |    |
| tA(AGC)E3   | T G G G G G A T T A G C T C A A A T G G T A G A G C G C T C G C T T A G C A T G C G A G A G G T A A C G G G A T C G A T G C C C G C A T C C T C C A C T T A |    |    |    |
| tA(AGC)M1 0 | T G G G G G A T T A G C T C A A A T G G T A G A G C G C T C G C T T A G C A T G C A A G A G G T A A T G G G A T C G A T G C C C A C A T C C T C C A G C T A |    |    |    |
| tA(AGC)M9   | - G G G G G A T T A G C T C A A A T G G T A G A G C G C T C G C T T A G C A T G C G A G A G G T A G A G G G A T C G A T G C C C A C A T C C T C C A - C A A |    |    |    |
| tA(AGC)M1 1 | - G G G G A A T T A G C T C A A A T G G T A G A G C G C T C G C T T A G C A T G C G A G A G G T A G A G G G A T C G A T G C C C G C A T T C T C C A G T A - |    |    |    |
| tA(AGC)S1   | T G G G G A A T T A G C T C A A A T G G T A G A G C G C T C G C T T A G C A T G T G A G A G G T A A C G G G A T C G A T G C C C G C A T T C T C C A T A G A |    |    |    |

Arginine<sub>1</sub>

|           | 1                                                                                                                                                           | 25 | 50 | 78 |
|-----------|-------------------------------------------------------------------------------------------------------------------------------------------------------------|----|----|----|
| tR(ACG)I  | C G G G C C A G T G G C G C A A T G G A T A A C G C G T C T G A C T A C G G A T C A G A A G A T T A T A G G T T C G A C T C C T G G C T G G C T C G A C G A |    |    |    |
| tR(ACG)M1 | C G G G C C A G T G G C G C A A T G G A T A A C G C G T C T G A C T A C G G A T C A G A A G A T T A T A G G T T C G A C T C C T G G C T G G C T C G A C C A |    |    |    |
| tR(ACG)N  | C G G G C C A G T G G C G C A A T G G A T A A C G C G T C T G A C T A C G G A T C A G A A G A T T A C A G G T T C G A C T C C T G G C T G G C T C G T T G A |    |    |    |
| tR(ACG)M2 | - G G G C C A G T G G C G C A A T G G A T A A C G C G T C T G A C T A C G G A T C A G A A G A T T C A A G G T T C G A C T C C T G G C T G G C T C G G A A - |    |    |    |
| tR(ACG)M3 | T G G G C C A G T G G C G C A A T G G A T A A C G C G T C T G A C T A C G G A T C A G A A G A T T A C A G G T T C G A C T C C T G G C T G G C T C G G T A A |    |    |    |
| tR(ACG)C  | C G G G C C A G T G G C G C A A T G G A T A A C G C G T C T G A C T A C G G A T C A G A A G A T T A T A G G T T C G A C T C C T A C C T G G C T C G A G C A |    |    |    |
| tR(TCG)G  | C G G C C G C G T G G C C T A A T G G A T A A G G C G T C T G A C T T C G G A T C A G A A G A T T A C A G G T T C G A G T C C T G C C G C G G T C G A C T A |    |    |    |
| tR(TCG)M1 | C G A C C A C G T G G C C T A A T G G A T A A G G C G T C T G A C T T C G G A T C A G A A G A T T A A G G G T T C G A A T C C C T T C G T G G T T G G T A A |    |    |    |
| tR(TCG)M3 | T G A C C A C G T G G C C T A A C G G A T A A G G C G T C T G A C T T C G G A T C A G A A G A T T A A G G G T T C G A A T C C C T T C G T G G T T A C T T A |    |    |    |
| tR(TCG)M2 | - G A C C A C G T G G C C T A A T G G A T A A G G C G T C T G A C T T C G G A T C A G A A G A T T G A G G G T T C G A A T C C C T T C G T G G T T G A G A - |    |    |    |
| tR(TCG)K  | - G A C C G C G T G G C C T A A T G G A T A A G G C G T C T G A C T T C G G A T C A G A A G A T T G A G G G T T C G A G T C C C T T C G T G G T C G A A A - |    |    |    |
| tR(CCG)M  | T G G C C G C G T G G C C T A A T G G A T A A G G C G T C T G A T T C C G G A T C A G A A G A T T A A G G G T T C G A G T C C C T T C G T G G T C G G T G A |    |    |    |
| tR(CCG)Q  | - G G C C G C G T G G C C T A A T G G A T A A G G C G T C T G A T T C C G G A T C A G A A G A T T G A G G G T T C G A G T C C C T T C G T G G T C G C T A - |    |    |    |
| tR(CCG)K  | T G A C C C A G T G G C C T A A T G G A T A A G G C A T C A G C C T C C G G A G C T G G G G A T T A T G G G T T C G A G T C C C A T C T G G G T C G C A T A |    |    |    |

Arginine<sub>2</sub>

|           | 1                                                                                                                                                                   | 25 | 50 | 75 |
|-----------|---------------------------------------------------------------------------------------------------------------------------------------------------------------------|----|----|----|
| tR(CCT)F  | - G C C C C A G T G G C C T A A T G G A T - A A G G C A T T G G C C T C C T A - - - - - - - - - - - - - A G C C A G G G A T T G A G G G T T C G A G T C C C A T C   |    |    |    |
| tR(CCT)X2 | - G C C C C A G T G G C C T A A T G G A T - A A G G C A C T G G C C T C C T A - - - - - - - - - - - - - A G C C A G G G A T T G A G G G T T C G A G T C C C A C C   |    |    |    |
| tR(CCT)K2 | C G C C C C A G T G G C C T A A T G G A T - A A G G C A C T G G C C T C C T A - - - - - - - - - - - - - A G C C A G G G A T T A T G G G T T C G A G T C C C A C C   |    |    |    |
| tR(CCT)K1 | - G C C C C A G T G G C C T A A T G G A T - A A G G C A C T G G C C T C C T A - - - - - - - - - - - - - A G C C A G G G A T T G A G G G T T C G A G T C C C A C C   |    |    |    |
| tR(CCT)Q  | - G C C C C G G T G G C C T A A T G G A T - A A G G C A T T G G C C T C C T A - - - - - - - - - - - - - A G C C A G G G A T T G A G G G T T C G A G T C C C A C C   |    |    |    |
| tR(TCT)I  | - G G C T C T G T G G A G C A A T G G A T - A G C A C A T T G G A C T T C T A G C A T G A C C G A G A A - A T T C A A A G G T T G C G G G T T C G A G T C C C A C C |    |    |    |
| tR(TCT)M  | - G G C T C T G T G G C G C A A T G G A T - A G C G C A T T G G A C T T C T A G C A T G A T T G A G A A - A T T C A A A G G T T G C G G G T T C G A G T C C C G C C |    |    |    |
| tR(TCT)K  | T G G C T C T G T G G C G C A A T G G A T - A G C G C A T T G G A C T T C T A G T G A C G A G A A A A C G A T T C A A A G G T T G T G G G T T C G A A T C C C A C C |    |    |    |
| tR(TCT)S  | T G G C T C T G T G G C G C A A T G G A T - A G C G C A T T G G A C T T C T A G A C A A A T G G A G A C - A T T C A A A G G T T G T G G G T T C G A G T C C C A C C |    |    |    |
| tR(TCT)C  | T G G C T C C G T G G C G C A A T G G A T - A G C G C A T T G G A C T T C T A G - - A G G C T G A A G G A A T T C A A A G G T T C C G G G T T C G A G T C C C G G C |    |    |    |
| tR(TCT)A  | - G T C T C T G T G G C G C A A T G G A C G A G C G C G C T G G A C T T C T A - - - - - - - - - - - - - A T C C A G A G G T T A T G G G T T C G A G T C C C G G C   |    |    |    |



# Asparagine

1

25

50

83

|           |   |   |   |   |   |   |   |   |   |   |   |   |   |   |   |   |   |   |   |   |   |   |   |   |   |   |   |   |   |   |   |   |   |   |   |   |   |   |   |   |   |   |   |   |   |   |   |   |   |   |   |   |   |   |   |   |   |   |   |   |   |   |   |   |   |   |   |   |   |   |   |   |   |   |   |   |   |   |   |   |   |   |   |
|-----------|---|---|---|---|---|---|---|---|---|---|---|---|---|---|---|---|---|---|---|---|---|---|---|---|---|---|---|---|---|---|---|---|---|---|---|---|---|---|---|---|---|---|---|---|---|---|---|---|---|---|---|---|---|---|---|---|---|---|---|---|---|---|---|---|---|---|---|---|---|---|---|---|---|---|---|---|---|---|---|---|---|---|---|
| tN(GTT)C2 | T | G | T | C | T | C | C | G | T | G | G | C | G | C | A | A | T | C | G | G | T | C | A | G | - | - | - | - | C | G | C | G | T | T | C | G | G | C | T | G | T | T | A | A | C | C | G | A | A | A | G | G | T | A | G | G | T | G | G | T | T | C | G | A | G | C | C | C | A | C | C | C | G | G | G | G | A | C | G | T | G | T | A |
| tN(GTT)C3 | T | G | T | C | T | C | T | G | T | G | G | T | G | C | A | A | T | C | G | G | T | C | A | G | - | - | - | - | C | G | C | G | T | T | T | G | G | C | T | G | T | T | A | A | C | T | G | G | A | A | G | G | T | A | G | G | T | G | G | T | T | T | G | A | G | C | C | C | A | C | C | C | G | G | G | G | A | C | G | T | G | T | A |
| tN(GTT)A1 | - | G | T | C | T | C | T | G | T | G | G | C | G | C | A | A | T | C | G | G | T | T | A | G | - | - | - | - | C | G | C | G | T | T | C | G | G | C | T | G | T | T | A | A | C | C | G | A | A | A | G | G | T | T | A | G | T | G | G | T | T | C | G | A | G | C | C | C | A | C | C | C | A | G | G | G | A | C | G | - | G | T | A |
| tN(GTT)C6 | T | G | T | C | T | C | T | G | T | G | G | C | G | C | A | A | T | C | G | G | T | T | A | G | - | - | - | - | C | G | C | G | T | T | C | G | G | C | T | G | T | T | A | A | C | C | G | A | A | A | G | G | T | A | G | G | T | G | G | T | T | C | G | A | G | C | C | C | A | C | C | C | A | G | G | G | A | C | G | G | T | G | A |
| tN(GTT)K  | C | G | T | C | T | C | T | G | T | G | G | C | G | C | A | A | T | C | G | G | T | T | A | G | - | - | - | - | C | G | C | G | T | T | C | G | G | C | T | G | T | T | A | A | C | C | G | A | A | A | G | G | T | A | G | G | T | G | G | T | T | C | G | A | G | C | C | C | A | C | C | C | A | G | G | G | A | C | G | G | T | C | A |
| tN(GTT)C1 | T | G | T | C | T | C | T | G | T | G | G | C | G | C | A | A | T | T | G | G | T | T | A | G | - | - | - | - | C | G | C | G | T | T | C | G | G | C | T | G | T | T | A | A | C | C | G | A | A | A | G | G | T | A | G | G | T | G | G | T | T | C | A | A | G | C | C | C | A | C | C | C | A | G | G | G | A | C | G | T | C | G | A |
| tN(GTT)C4 | C | G | T | C | T | C | T | G | T | G | G | C | G | C | A | A | T | C | G | G | T | T | A | G | - | - | - | - | C | G | C | G | T | T | C | G | G | C | T | G | T | T | A | A | C | C | G | A | A | A | G | G | T | A | G | G | T | G | G | T | T | C | G | A | G | C | C | C | A | C | C | C | A | G | G | G | A | C | G | A | G | C | A |
| tN(GTT)J  | C | G | T | C | T | C | T | G | T | G | G | C | G | C | A | A | T | C | G | G | T | T | A | G | - | - | - | - | C | G | C | G | T | T | C | G | G | C | T | G | T | T | A | A | C | C | G | A | A | A | G | G | T | A | G | G | T | G | G | T | T | C | G | A | G | C | C | C | A | C | C | C | A | G | G | G | A | C | G | A | C | C | A |
| tN(GTT)C5 | C | G | T | C | T | C | T | G | T | G | G | C | G | C | A | A | T | C | G | G | T | T | A | G | - | - | - | - | C | G | C | G | T | T | C | G | G | C | T | G | T | T | A | A | C | C | G | A | A | A | G | G | T | A | G | G | T | G | G | T | T | C | G | A | G | C | C | C | A | C | C | C | A | G | G | G | A | C | G | A | C | A | A |
| tN(GTT)E3 | T | G | T | C | T | C | T | G | T | G | G | C | G | C | A | A | T | C | G | G | T | T | A | G | - | - | - | - | C | G | C | G | T | T | C | G | G | C | T | G | T | T | A | A | C | C | G | A | A | A | G | G | T | A | G | G | T | G | G | T | T | C | G | A | G | C | C | C | A | C | C | C | A | G | G | G | A | C | G | G | C | A | A |
| tN(GTT)B  | - | G | T | C | T | C | T | G | T | G | G | C | G | C | A | A | T | C | G | G | T | T | A | G | - | - | - | - | C | G | C | G | T | T | C | G | G | C | T | G | T | T | A | A | C | C | G | A | A | A | G | G | T | T | A | G | T | G | G | T | T | C | G | A | G | C | C | C | A | C | C | C | A | G | G | G | A | C | G | C | C | A | - |
| tN(GTT)O  | - | G | T | C | T | C | T | G | T | G | G | C | G | C | G | A | T | C | G | G | T | T | A | G | - | - | - | - | T | G | C | G | T | T | T | G | G | C | T | G | T | T | A | A | C | C | G | A | A | A | G | G | T | T | A | G | T | G | G | T | T | C | A | A | A | C | C | C | A | C | C | C | G | G | G | G | A | C | G | A | C | A | - |
| tN(GTT)A2 | T | G | C | C | T | C | T | G | T | G | G | T | G | C | A | A | T | T | G | G | T | T | A | G | - | - | - | - | C | A | T | G | T | T | C | C | G | C | T | G | T | T | A | A | C | C | A | A | A | A | G | G | T | A | G | G | T | G | G | T | T | C | G | A | G | C | C | C | A | C | C | C | A | G | G | G | A | C | A | A | C | A | A |
| tN(GTT)H  | - | G | T | C | T | C | T | G | T | C | A | T | G | C | A | G | T | C | G | G | T | T | A | G | T | G | A | G | C | G | A | G | T | T | A | G | G | C | T | G | T | T | A | A | C | C | G | G | A | A | G | G | T | T | G | G | T | G | G | T | T | C | G | A | G | C | C | C | A | C | C | C | A | A | G | G | A | C | A | - | - | - | - |



Glutamine

|           | 1 | 25 | 50 | 77 |   |   |   |   |   |   |   |   |   |   |   |   |   |   |   |   |   |   |   |   |   |   |   |   |   |   |   |   |   |   |   |   |   |   |   |   |   |   |   |   |   |   |   |   |   |   |   |   |   |   |   |   |   |   |   |   |   |   |   |   |   |   |   |   |   |   |   |   |   |   |   |   |   |
|-----------|---|----|----|----|---|---|---|---|---|---|---|---|---|---|---|---|---|---|---|---|---|---|---|---|---|---|---|---|---|---|---|---|---|---|---|---|---|---|---|---|---|---|---|---|---|---|---|---|---|---|---|---|---|---|---|---|---|---|---|---|---|---|---|---|---|---|---|---|---|---|---|---|---|---|---|---|---|
| tQ(TTG)C  | A | G  | T  | T  | C | C | A | T | G | G | T | G | T | A | A | T | G | G | T | T | G | G | C | A | C | T | C | T | G | G | A | C | T | T | T | G | A | A | T | C | C | A | G | C | A | A | T | C | A | A | A | G | T | T | C | A | A | G | T | C | T | C | T | G | T | G | G | G | A | C | C | T | C | T | C | A |   |
| tQ(TTG)X1 | T | G  | G  | T  | C | T | C | A | T | G | G | T | G | T | A | A | T | G | G | T | T | A | G | C | A | C | A | C | T | G | G | A | C | T | T | T | G | A | G | T | C | C | A | G | C | A | A | T | C | A | G | A | G | T | T | C | G | A | G | T | C | T | T | G | G | T | G | A | G | A | C | C | A | C | T | C | A |
| tQ(TTG)K1 | A | G  | G  | A  | C | C | C | A | T | G | G | T | G | T | A | A | T | G | G | T | T | A | G | C | A | C | T | C | T | G | G | A | C | T | T | T | G | A | A | T | C | C | A | G | C | A | A | T | C | A | A | A | G | T | T | C | A | A | A | T | C | T | C | G | G | T | G | G | G | A | C | C | T | C | T | T | A |
| tQ(TTG)K2 | A | G  | G  | T  | C | C | C | A | T | G | G | T | G | T | A | A | T | G | G | T | T | A | G | C | A | C | T | C | T | G | G | A | C | T | T | T | G | A | A | T | C | C | A | G | C | G | A | T | C | A | G | A | G | T | T | C | A | A | A | T | C | T | C | G | G | T | G | G | G | A | C | C | T | C | A | C | A |
| tQ(TTG)M2 | A | G  | G  | C  | C | C | C | A | T | G | G | T | G | T | A | A | T | G | G | T | T | A | G | C | A | C | T | C | T | G | G | A | C | T | T | T | G | A | A | T | C | C | A | G | C | G | A | T | C | A | G | A | G | T | T | C | A | A | A | T | C | T | C | A | G | T | G | G | A | A | C | C | T | T | A | A | A |
| tQ(CTG)B  | G | G  | G  | T  | T | C | C | A | T | G | G | T | G | T | A | A | T | G | G | T | T | A | G | C | A | C | T | C | T | G | G | A | C | T | C | T | G | A | A | T | C | C | A | G | C | C | A | T | A | A | A | A | G | T | T | C | A | A | A | T | C | T | C | A | G | T | G | G | A | A | C | C | T | T | A | A | A |
| tQ(CTG)K  | G | G  | G  | T  | T | C | C | A | T | G | G | T | G | T | A | A | T | G | G | T | T | A | G | C | A | C | T | C | T | G | G | A | C | T | C | T | G | A | A | T | C | C | A | G | C | G | A | T | C | A | G | A | G | T | T | C | A | A | A | T | C | T | C | G | G | T | G | G | A | A | C | C | T | T | A | G | A |
| tQ(CTG)M2 | - | G  | G  | T  | T | C | C | A | T | G | G | T | G | T | A | A | T | G | G | C | T | A | G | C | A | C | T | C | T | G | G | A | C | T | C | T | G | A | A | T | C | C | A | G | C | G | A | T | C | C | A | A | G | T | T | C | A | A | A | T | C | T | C | G | G | T | G | G | G | A | T | - | T | T | A | T | A |
| tQ(CTG)I  | - | G  | G  | T  | T | C | C | A | T | G | G | T | G | T | A | A | T | G | G | T | T | A | G | C | A | C | T | C | T | G | G | A | C | T | C | T | G | A | A | T | C | C | A | G | C | G | A | T | C | C | A | A | G | T | T | C | A | A | A | T | C | T | C | G | G | T | G | G | A | A | C | C | T | G | C | A | - |
| tQ(TTG)M3 | - | G  | G  | C  | C | C | C | A | T | G | G | T | G | T | A | A | T | G | G | T | T | A | G | C | A | C | T | C | T | G | G | A | C | T | T | T | G | A | A | T | C | C | A | G | C | G | A | T | C | C | A | A | G | T | T | C | A | A | A | T | C | T | C | G | G | T | G | G | G | A | C | C | T | T | C | A | - |
| tQ(CTG)F  | G | G  | G  | T  | T | C | C | T | T | G | G | T | G | T | A | A | - | G | A | T | G | A | G | C | A | C | T | C | T | G | G | A | T | T | C | T | G | A | A | T | C | C | A | G | C | G | A | T | C | A | A | A | G | T | T | C | A | A | A | T | C | T | C | G | G | T | G | G | G | A | C | C | T | C | C | A | A |
| tQ(CTG)M1 | G | G  | G  | T  | T | C | C | A | T | G | G | T | G | T | A | A | T | G | G | T | T | A | G | C | A | C | T | C | T | G | G | A | C | T | C | T | G | A | A | T | C | C | A | G | C | G | A | T | C | A | G | A | G | T | T | C | A | A | A | T | C | T | C | G | G | T | G | G | A | A | C | C | T | A | G | T | A |
| tQ(CTG)C2 | G | G  | G  | T  | T | C | C | A | T | G | G | T | G | T | A | A | T | G | G | T | T | A | G | C | A | C | T | C | T | G | G | A | C | T | C | T | G | A | A | T | C | C | A | G | C | G | A | T | C | A | G | A | G | T | T | C | A | A | A | T | C | T | C | G | G | T | G | G | G | A | C | C | T | T | T | G | A |
| tQ(CTG)C3 | G | G  | G  | T  | T | C | C | A | T | G | G | T | G | T | A | A | T | G | G | T | T | A | G | C | A | C | T | C | T | G | G | A | C | T | C | T | G | A | A | T | C | C | A | G | C | G | A | T | C | A | G | A | G | T | T | C | A | A | A | T | C | T | C | G | G | T | G | G | G | A | C | C | T | T | T | A |   |
| tQ(CTG)C1 | A | G  | G  | T  | T | C | C | A | T | G | G | T | G | T | A | A | T | G | G | T | T | A | G | C | A | C | T | C | T | G | G | A | C | T | C | T | G | A | A | T | C | C | A | G | C | G | A | T | C | A | G | A | G | T | T | C | A | A | A | T | C | T | C | G | G | T | G | G | G | A | C | C | T | C | T | C | A |
| tQ(CTG)C4 | G | G  | G  | T  | T | C | C | A | T | G | G | T | G | T | A | A | T | G | G | T | G | A | G | C | A | C | T | C | T | G | G | A | C | T | C | T | G | A | A | T | C | C | A | G | C | G | A | T | C | A | G | A | G | T | T | C | A | A | A | T | C | T | C | G | G | T | G | G | G | A | C | C | T | T | T | C | A |
| tQ(TTG)M1 | G | G  | G  | T  | C | C | C | A | T | G | G | T | G | T | A | A | T | G | G | T | T | A | G | C | A | C | T | C | T | G | G | A | C | T | T | T | G | A | A | T | C | C | A | G | C | A | A | T | C | A | G | A | G | T | T | C | A | A | A | T | C | T | C | G | G | T | G | G | G | A | C | C | T | T | T | A | A |
| tQ(TTG)M4 | - | G  | A  | C  | C | C | T | G | C | A | G | T | G | T | A | A | T | G | G | T | T | A | G | C | A | C | T | C | T | G | G | A | C | T | T | T | G | G | A | T | T | C | A | G | T | G | G | T | C | T | G | A | G | T | T | C | A | A | A | C | C | T | C | A | G | T | G | G | A | T | C | C | - | - | - | - | - |

Glutamic Acid<sub>1</sub>

|           | 1                                                                                                                                                           | 25 | 50 | 78 |
|-----------|-------------------------------------------------------------------------------------------------------------------------------------------------------------|----|----|----|
| tE(CTC)A2 | - T C C C T G G T G G T C T A G T G G T T A G G A T T C G G C G C T C T C A C C G C C G C G G C C - C A G G T T C G A T T C C C G G T C A G G G A A G C A - |    |    |    |
| tE(CTC)J  | - T C C C T G G T G G T C T A G T G G T T A G G A T T C G G C G C T C T C A C C G C C G C G G C C - C A G G T T C G A T T C C C G G T C A G G G A A G C A - |    |    |    |
| tK(CTT)C4 | - T C C C T G G T G G T C T A G T G G T T A G G A T T C A G T G C T C T T A C C A C C A T G G C C T G G G G T T C G A T T C C - - G T C A G G G A A - - - - |    |    |    |
| tE(CTC)L  | T T C C C T G G T G G T C T A G T G G T T A G G A G T C A T T G C T C T C A C C A C C G C G T C C - A G G G T T C G A T T C C C G G T C A G G G A A A T A A |    |    |    |
| tE(CTC)C1 | T T C C C T G G T G G T C T A G T G G T T A G G A T T C G G C G C T C T C A C C G C C G C G G C C - A G G G T T C G A T T C C C G G T C A G G G A A A T A A |    |    |    |
| tE(CTC)C2 | T T C C C T G G T G G T C T A G T G G T T A G G A T T C G G C G C T C T C A C C G C C G C G G C C - A G G G T T C G A T T C C C G G T C A G G G A A A T A A |    |    |    |
| tE(CTC)K  | T T C C C T G G T G G T C T A G T G G T T A G G A T T C G G C G C T C T C A C C G C C G C G G C C - A G G G T T C G A T T C C C G G T C A G G G A A G T A A |    |    |    |
| tE(CTC)M  | T T C C C T G G T G G T C T A G T G G T T A G G A T T C G G C G C T C T C A C C G C C G C G G C C - A G G G T T C G A T T C C C G G T C A G G G A A G T G A |    |    |    |
| tE(CTC)A3 | - T C C C T G G T G G T C T A G T G G T T A G G A T T C G G C G C T C T C A C C G C C G C G G C C - C A G G T T C G A T T C C C G G T C A G G G A A G T A - |    |    |    |
| tE(TTC)C  | - T C C C T G G T G G T C T A G T G G C T A G G A T T C G G C G C T T T C A C C G C C G C G G C C - C A G G T T C G A T T C C C G G T C A G G G A A G G A - |    |    |    |
| tE(CTC)Q  | - T C C C T G G T G G T C T A G T G G T T A G G A T T T G G C G C T C T C A C C G C C G C G G C C - T A G G T T C G A T T C C C G G T C A G G G A A G C A - |    |    |    |
| tE(CTC)A1 | - T C C C T G G T G G T T T A G T G G T T A G G A T T T G G C G C T C T C A A C A C C G A A G C C - C A G G T T C A A T T C C C A G T C A G G G A A G C A - |    |    |    |
| tA(CGC)D  | - T C C C T G G T A G T C T A G T G G T T A G G A T T C G G T G C T C G C A C C G C C G T G G C C - C A G G T T T G A A T C C T A G T C A G G G A A G T A - |    |    |    |
| tE(CTC)G  | - T C C C T G G T G G T C T A G T G G T T A G G C T T T G G T G C T C T C A C C T C C A T G G C C - C A G G T T T G A T T C C T G G T C A G G G A A G C A - |    |    |    |
| tE(CTC)C3 | - T C C C T G A T G G T A T A G T G G T T A G G A C T C G G T G G T C T C A C C A G C G C T G C C - C A G G T T C A A T T C C T G G T T A G G G A A C C A - |    |    |    |
| tE(CTC)H  | - T C C C T G G C G G C C T A G T G G T T A G G A T T C A G T G C T C T C A C A G C T G C A G C C - C A G G T T T G A T T C C T G G T C A G G G A C - - - - |    |    |    |

# Glutamic Acid<sub>2</sub>

|           | 1                                                                                                                                                         | 25 | 50 | 77 |
|-----------|-----------------------------------------------------------------------------------------------------------------------------------------------------------|----|----|----|
| tE(TTC)G  | T T C C C A C A T G G T C T A G C G G T T A G G A T T C C T G G T T T T C A C C C A G G C G G C C A G G G T T C G A C T C C C G G T G T G G G A A C A G A |    |    |    |
| tE(TTC)I  | T T C C C A C A T G G T C T A G C G G T T A G G A T T C C T G G T T T T C A C C C A G G C G G C C A G G G T T C G A C T C C C G G T G T G G G A A C A C A |    |    |    |
| tE(TTC)M  | T T C C C A C A T G G T C T A G C G G T T A G G A T T C C T G G T T T T C A C C C A G G C G G C C A G G G T T C G A C T C C C G G T G T G G G A A A C T A |    |    |    |
| tE(TTC)N2 | T T C C C A T A T G G T C T A G C G G T T A G G A T T C C T G G T T T T C A C C C A G G C G G C C A G G G T T C G A C T C C C G G T A T G G G A A C A G A |    |    |    |
| tE(TTC)A1 | - T C C C A T A T G G T C T A G C G G T T A G G A T T C C T G G T T T T C A C C C A G G C G G C C C A G G T T C G A C T C C C G G T A T G G G A A C A A - |    |    |    |
| tE(TTC)N1 | - T C C C A C A T G G T C T A G C G G T T A G G A T T C C T G G T T T T C A C C C A G G C G G C C C A G G T T C G A C T C C C G G T G T G G G A A C G A - |    |    |    |

Glycine<sub>1</sub>

|           | 1                                                                                                                                                         | 25 | 50 | 77 |
|-----------|-----------------------------------------------------------------------------------------------------------------------------------------------------------|----|----|----|
| tG(GCC)A3 | - G C A T G G G T G G T T C A G T G G T A G A A T T C T C G C C T G C C A C G C G G G A G G C C C G A G T T C G A T T C C C G G C C C A T - G C A G A A - |    |    |    |
| tG(GCC)G  | G G C A T G G G T G G T T C A G T G G T A G A A T T C T C A C C T G C C A T G A G G G A G G C C C A G G T T C A A T T C C A G G C C C A T T G C A G A A - |    |    |    |
| tG(GCC)D2 | - G C A T T G G T G G T T C A G T G G T A G A A T T C T T G C C T G C C A C C C G G G A G G C C C A A G T T C A A T T C C T G G C C A A T - G T A C A A - |    |    |    |
| tG(GCC)A1 | - G C A T T G G T G G T T C A G T G G T A G A A T T C T C G C C T G C C A C G C G G G A G G C C C G A G T T T G A T T C C C G G C C A A T - G C A T T A - |    |    |    |
| tG(GCC)H3 | - G C A T T G G T G G T T C A G T G G T A G A A T T C T C G C C T G C C A C G C G G G A G G C C C G A G T T C G G T T C C C G G C C A A T - G C A T A A - |    |    |    |
| tG(GCC)A2 | - G C A T T G G T G G T T C A G T G G T A G A A T T C T C G C C T G C C A C G C G G G A G G C C C G A G T T C G A T T C C C G G C C A A T - G C A C G A - |    |    |    |
| tG(GCC)M1 | - G C A T T G G T G G T T C A G T G G T A G A A T T C T C G C C T G C C A C G C G G G A G G C C C G A G T T C G A T T C C C G G C C A A T - G C A G G A - |    |    |    |
| tG(GCC)H1 | - G C A T T G G T G G T T C A G T G G T A G A A T T C T C G C C T G C C A C G C G G G A G G C C C G A G T T C G A T T C C C G G C C A A T - G C A G T A - |    |    |    |
| tG(GCC)H2 | - G C A T T G G T G G T T C A G T G G T A G A A T T C T C G C C T G C C A C G C G G G A G G C C C G A G T T C G A T T C C C G G C C A A T - G C A G A A - |    |    |    |
| tG(GCC)C  | - G C A T T G G T G G T T C A G T G G T A G A A T T C T C G C C T G C C A C G C G G G A G G C C C G A G T T C G A T T C C C G G C C A A T - G C A C A A - |    |    |    |
| tG(GCC)M2 | - G C A T T G G T G G T T C A G T G G T A G A A T T C T C G C C T G C C A C G C G G G A G G C C C G A G T T C G A T T C C C G G C C A A T - G C A C T A - |    |    |    |
| tG(GCC)B  | T G C A T T G G T G G T T C A G T G G T A G A A T T C T C G C C T G C C A C G C G G G A G G C C C A G G T T C G A T T C C C G G C C A A T - G C A C T T A |    |    |    |
| tG(GCC)K1 | T G C A T T G G T G G T T C A G T G G T A G A A T T C T C G C C T G C C A C G C G G G A G G C C C A G G T T C G A T T C C C G G C C A A T - G C A C A G A |    |    |    |
| tG(GCC)J  | - G T A T T G G T G G T T C A G T G G T A G A A T T C T C G C C T G C C A C A C C G G A T G C C T G A G T T C C A T T C C C G G C C A A T - G C A C T A - |    |    |    |
| tG(CCC)C2 | T G C A T T G G T A G T T C A A T G G T A G A A T T C T C G C C T C C C A C G C G G G T G A C C C A G G T T C G A T T C C C G G C C A A T - G C A G T A A |    |    |    |
| tG(CCC)D  | T G C A T T G G T G G T T C A A T G G T A G A A T T C T C G C C T C C C A C T C G G G T G A C C C A G G T T C G A T T C C C G G C C A A T - G C A A T A A |    |    |    |
| tG(CCC)C1 | - G C A T T G G T G G T T C A G T G G T A G A A T T C T C G C C T C C C A C A T G G G G G A C T T G A G C T C A A T T C C C A G C C A A T - G C A A G A - |    |    |    |

Glycine<sub>2</sub>

|           | 1 | 25 | 50 | 77 |   |   |   |   |   |   |   |   |   |   |   |   |   |   |   |   |   |   |   |   |   |   |   |   |   |   |   |   |   |   |   |   |   |   |   |   |   |   |   |   |   |   |   |   |   |   |   |   |   |   |   |   |   |   |   |   |   |   |   |   |   |   |   |   |   |   |   |   |   |   |   |   |   |   |   |
|-----------|---|----|----|----|---|---|---|---|---|---|---|---|---|---|---|---|---|---|---|---|---|---|---|---|---|---|---|---|---|---|---|---|---|---|---|---|---|---|---|---|---|---|---|---|---|---|---|---|---|---|---|---|---|---|---|---|---|---|---|---|---|---|---|---|---|---|---|---|---|---|---|---|---|---|---|---|---|---|---|
| tG(TCC)A1 | T | G  | C  | G  | T | T | G | G | T | G | G | T | A | T | A | G | T | G | G | T | G | A | G | C | A | T | A | G | C | T | G | C | C | T | T | C | C | A | A | G | C | A | G | T | T | G | A | C | C | A | G | G | G | T | T | C | G | A | T | T | C | C | C | G | G | C | C | A | A | C | G | C | A | A | A | G | A |   |   |
| tG(TCC)K  | T | G  | C  | G  | T | T | G | G | T | G | G | T | A | T | A | G | T | G | G | T | G | A | G | C | A | T | A | G | C | T | G | C | C | T | T | C | C | A | A | G | C | A | G | T | T | G | A | C | C | A | G | G | G | T | T | C | G | A | T | T | C | C | C | G | G | C | C | A | A | C | G | C | A | A | C | G | A |   |   |
| tG(TCC)A2 | - | G  | C  | G  | T | T | G | G | T | G | G | T | A | T | A | G | T | G | G | T | G | A | G | C | A | T | A | G | C | T | G | C | C | T | T | C | C | A | A | G | C | A | G | T | T | G | A | C | C | A | G | G | T | T | C | G | A | T | T | C | C | C | G | G | C | C | A | A | C | G | C | A | G | C | A | G | C | A | - |
| tG(TCC)A3 | T | G  | C  | G  | T | T | G | G | T | G | G | T | A | T | A | G | T | G | G | T | G | A | G | C | A | T | A | G | C | T | G | C | C | T | T | C | C | A | A | G | C | A | G | T | T | G | A | C | C | A | G | G | G | T | T | C | G | A | T | T | C | C | C | G | G | C | C | A | A | C | G | C | A | T | A | A | A |   |   |
| tG(TCC)C  | T | G  | C  | G  | T | T | G | G | T | G | G | T | A | T | A | G | T | G | G | T | G | A | G | C | A | T | A | G | C | T | G | C | C | T | T | C | C | A | A | G | C | A | G | T | T | G | A | C | C | A | G | G | G | T | T | C | G | A | T | T | C | C | C | G | G | C | C | A | A | C | G | C | A | T | A | A | A |   |   |
| tG(TCC)X1 | T | G  | C  | G  | T | T | G | G | T | G | G | T | A | T | A | G | T | G | G | T | G | A | G | C | A | T | A | G | C | T | G | C | C | T | T | C | C | A | A | G | C | A | G | T | T | G | A | C | C | A | A | G | G | T | T | T | G | A | T | A | C | C | C | A | G | C | C | A | A | C | G | C | A | T | G | A | A |   |   |

# Glycine<sub>3</sub>

|          |   |   |   |   |   |   |   |   |   |   |   |   |   |   |   |   |   |   |   |   |   |   |   |   |   |   |   |   |   |   |   |   |   |   |   |   |   |   |   |   |   |   |   |   |   |   |   |   |   |   |   |   |   |   |   |   |   |   |   |   |   |   |   |   |   |   |   |   |   |   |   |   |   |   |   |    |
|----------|---|---|---|---|---|---|---|---|---|---|---|---|---|---|---|---|---|---|---|---|---|---|---|---|---|---|---|---|---|---|---|---|---|---|---|---|---|---|---|---|---|---|---|---|---|---|---|---|---|---|---|---|---|---|---|---|---|---|---|---|---|---|---|---|---|---|---|---|---|---|---|---|---|---|---|----|
| tG(CCC)F | 1 | G | C | G | C | C | G | C | T | G | G | T | G | T | A | G | T | G | G | T | A | T | C | A | T | G | C | A | A | G | A | T | T | C | C | C | A | T | T | C | T | T | G | C | G | A | C | C | C | G | A | G | T | T | C | G | A | T | T | C | C | C | G | G | G | C | G | G | C | G | C | A | T | G | A | 74 |
| tG(CCC)Q |   | G | C | G | C | C | G | C | T | G | G | T | G | T | A | G | T | G | G | T | A | T | C | A | T | G | C | A | A | G | A | T | T | C | C | C | A | T | T | C | T | T | G | C | G | A | C | C | C | G | A | G | T | T | C | G | A | T | T | C | C | C | G | G | G | C | G | G | C | G | C | A | T | G | A |    |



# Histidine

|           | 1                                                                                                                                                         | 25 | 50 | 77 |
|-----------|-----------------------------------------------------------------------------------------------------------------------------------------------------------|----|----|----|
| tH(GTG)C3 | - G C C G T G A T C G T A T A G T G G T T A G T A C T C T G C G T T G T G G C C G C A G C A A C C T A G G T T C G A A T C C G A G T C A C G G C A T G A - |    |    |    |
| tH(GTG)D  | - G C C G T G A T C G T A T A G T G G T T A G T A C T C T G C G T T G T G G C C G C A G C A A C C T A G G T T C G A A T C C G A G T C A C G G C A G G A - |    |    |    |
| tH(GTG)C1 | - G C C G T G A T C G T A T A G T G G T T A G T A C T C T G C G T T G T G G C C G C A G C A A C C T A G G T T C G A A T C C G A G T C A C G G C A G T A - |    |    |    |
| tH(GTG)B1 | - G C C G T G A T C G T A T A G T G G T T A G T A C T C T G C G T T G T G G C C G C A G C A A C C T A G G T T C G A A T C C G A G T C A C G G C A T T A - |    |    |    |
| tH(GTG)B2 | - G C C G T G A T C G T A T A G T G G T T A G T A C T C T G C G T T G T G G C C G C A G C A A C C T A G G T T C G A A T C C G A G T C A C G G C A T T A - |    |    |    |
| tH(GTG)B3 | - G C C G T G A T C G T A T A G T G G T T A G T A C T C T G C G T T G T G G C C G C A G C A A C C T A G G T T C G A A T C C G A G T C A C G G C A T T A - |    |    |    |
| tH(GTG)C5 | - G C C G T G A T C G T A T A G T G G T T A G T A C T C T G C G T T G T G G C C G C A G C A A C C T A G G T T C G A A T C C G A G T C A C G G C A T T A - |    |    |    |
| tH(GTG)C2 | - G C C G T G A T C G T A T A G G G T T A G T A C T C T G C G T T G T G G C C G C A G C A A C C T A G G T T C G A A T C C G A G T C A C G G C A T T A -   |    |    |    |
| tH(GTG)C4 | T G C C G A G A T C G T A T A G T G G T T A G T A C T C T G C A T T G T G G C T G C A G C A A C C A C G G T T C G A A T C C G A G T C T C G G C A C T A A |    |    |    |

Isoleucine<sub>1</sub>

|           | 1 | 25 | 50 | 79 |   |   |   |   |   |   |   |   |   |   |   |   |   |   |   |   |   |   |   |   |   |   |   |   |   |   |   |   |   |   |   |   |   |   |   |   |   |   |   |   |   |   |   |   |   |   |   |   |   |   |   |   |   |   |   |   |   |   |   |   |   |   |   |   |   |   |   |   |   |   |   |   |   |   |   |   |
|-----------|---|----|----|----|---|---|---|---|---|---|---|---|---|---|---|---|---|---|---|---|---|---|---|---|---|---|---|---|---|---|---|---|---|---|---|---|---|---|---|---|---|---|---|---|---|---|---|---|---|---|---|---|---|---|---|---|---|---|---|---|---|---|---|---|---|---|---|---|---|---|---|---|---|---|---|---|---|---|---|---|
| tI(AAT)M1 | T | G  | G  | C  | C | G | G | T | T | A | G | C | T | C | A | G | T | T | G | G | T | T | A | G | A | G | C | G | T | G | G | T | G | C | T | A | A | T | A | A | C | G | C | C | A | A | G | G | T | A | G | C | G | G | G | T | T | C | G | A | T | C | C | C | C | G | T | A | C | G | G | G | C | C | A | G | T | A | A |   |
| tI(AAT)M3 | T | G  | G  | C  | C | G | G | T | T | A | G | C | T | C | A | G | T | T | G | G | T | T | A | G | A | G | C | G | T | G | G | T | G | C | T | A | A | T | A | A | C | G | C | C | A | A | G | G | T | A | G | C | G | G | G | T | T | C | G | A | T | C | C | C | C | G | T | A | C | G | G | G | C | C | A | G | T | A | A |   |
| tI(AAT)M2 | T | G  | G  | C  | C | G | G | T | T | A | G | C | T | C | A | G | T | T | G | G | T | T | A | G | A | G | C | G | T | G | G | T | G | C | T | A | A | T | A | A | C | G | C | C | A | A | G | G | T | A | G | C | G | G | G | T | T | C | G | A | T | C | C | C | C | G | T | A | C | G | G | G | C | C | A | G | T | G | A |   |
| tI(AAT)K2 | T | G  | G  | C  | C | G | G | T | T | A | G | C | T | C | A | G | T | T | G | G | T | T | A | G | A | G | C | G | T | G | G | T | G | C | T | A | A | T | A | A | C | G | C | C | A | A | G | G | T | A | G | C | G | G | G | T | T | C | G | A | T | C | C | C | C | G | T | A | C | G | G | G | C | C | A | G | T | G | A |   |
| tI(AAT)L  | T | G  | G  | C  | C | G | G | T | T | A | G | C | T | C | A | G | T | T | G | G | T | T | A | G | A | G | C | G | T | G | G | T | G | C | T | A | A | T | A | A | C | G | C | C | A | A | G | G | T | A | G | C | G | G | G | T | T | C | G | A | T | C | C | C | C | G | T | A | C | G | G | G | C | C | A | G | T | G | G | A |
| tI(AAT)M4 | T | G  | G  | C  | C | G | G | T | T | A | G | C | T | C | A | G | T | T | G | G | T | T | A | G | A | G | C | G | T | G | G | T | G | C | T | A | A | T | A | A | C | G | C | C | A | A | G | G | T | A | G | C | G | G | G | T | T | C | G | A | T | C | C | C | C | G | T | A | C | G | G | G | C | C | A | C | A | C | A |   |
| tI(AAT)M5 | T | G  | G  | C  | C | G | G | T | T | A | G | C | T | C | A | G | T | T | G | G | T | T | A | G | A | G | T | G | T | G | G | T | G | C | T | A | A | T | A | A | C | G | C | C | A | A | G | G | T | A | G | C | G | G | G | T | T | C | G | A | T | C | C | C | C | G | T | A | C | G | G | G | C | C | A | C | A | T | A |   |
| tI(AAT)K1 | T | G  | G  | C  | C | G | G | T | T | A | G | C | T | C | A | G | T | T | G | G | T | T | A | G | A | G | C | G | T | G | G | T | G | C | T | A | A | T | A | A | C | G | C | C | A | A | G | G | T | A | G | C | G | G | G | T | T | C | G | A | T | C | C | C | C | G | T | A | C | G | G | G | C | C | A | A | G | A |   |   |
| tI(AAT)M6 | T | G  | G  | C  | C | G | G | T | T | A | G | C | T | C | A | G | T | T | G | G | T | T | A | G | A | G | C | G | T | G | G | T | G | C | T | A | A | T | A | A | C | G | C | C | A | A | G | G | T | A | G | C | G | G | G | T | T | C | G | A | T | C | C | C | C | G | T | A | C | G | G | G | C | C | A | G | C | T | A |   |
| tI(AAT)D1 | T | G  | G  | C  | C | G | G | T | T | A | G | C | T | C | A | G | T | T | G | G | T | T | A | G | A | G | C | A | T | G | G | T | G | C | T | A | A | T | A | A | C | G | C | C | A | A | G | G | T | A | A | C | G | G | G | T | T | C | G | A | T | C | C | C | C | G | T | A | T | G | G | G | C | C | A | G | T | G | G | A |
| tI(AAT)P  | T | G  | G  | C  | C | G | G | T | T | A | G | C | T | C | A | G | T | T | G | G | T | T | A | G | A | G | C | A | T | G | G | T | G | C | T | A | A | T | A | A | C | G | C | C | A | A | G | G | T | A | G | T | G | G | T | T | C | G | A | T | G | C | C | C | G | T | A | T | G | G | G | C | C | A | G | C | A | A |   |   |
| tI(AAT)H  | - | G  | G  | C  | T | A | G | T | T | A | G | C | T | C | A | G | T | T | G | G | T | T | A | G | A | G | C | A | T | G | G | T | G | C | T | A | A | T | A | A | T | G | C | C | A | A | G | G | T | C | G | C | A | G | T | T | T | C | A | A | - | A | C | C | T | G | T | A | T | G | G | G | C | T | A | - | - | - | - |   |

# Isoleucine<sub>2</sub>

|           |   |   |    |   |    |   |    |   |     |   |   |   |   |   |   |   |   |   |   |   |   |   |   |   |   |   |   |   |   |   |   |   |   |   |   |   |   |   |   |   |   |   |   |   |   |   |   |   |   |   |   |   |   |   |   |   |   |   |   |   |   |   |   |   |   |   |   |   |   |   |   |   |   |   |   |   |   |   |   |   |   |   |   |   |   |   |   |   |   |   |   |   |   |   |   |   |   |   |   |
|-----------|---|---|----|---|----|---|----|---|-----|---|---|---|---|---|---|---|---|---|---|---|---|---|---|---|---|---|---|---|---|---|---|---|---|---|---|---|---|---|---|---|---|---|---|---|---|---|---|---|---|---|---|---|---|---|---|---|---|---|---|---|---|---|---|---|---|---|---|---|---|---|---|---|---|---|---|---|---|---|---|---|---|---|---|---|---|---|---|---|---|---|---|---|---|---|---|---|---|---|---|
|           | 1 |   | 25 |   | 50 |   | 75 |   | 101 |   |   |   |   |   |   |   |   |   |   |   |   |   |   |   |   |   |   |   |   |   |   |   |   |   |   |   |   |   |   |   |   |   |   |   |   |   |   |   |   |   |   |   |   |   |   |   |   |   |   |   |   |   |   |   |   |   |   |   |   |   |   |   |   |   |   |   |   |   |   |   |   |   |   |   |   |   |   |   |   |   |   |   |   |   |   |   |   |   |   |
| tI(TAT)M2 | T | G | C  | T | C  | C | A  | G | T   | G | G | C | G | C | A | A | T | C | G | G | T | T | A | G | C | G | C | G | G | T | A | C | T | T | A | T | A | C | A | G | C | A | G | T | A | T | A | A | G | - | - | T | G | C | G | G | G | T | G | A | T | G | C | C | G | A | G | G | T | T | G | T | G | A | G | T | T | C | G | A | G | C | C | T | C | A | C | C | T | G | G | A | G | C | A | T | G | T | A |
| tI(TAT)Q4 | - | G | C  | T | C  | C | A  | G | T   | G | G | C | G | C | A | A | T | C | G | G | T | T | A | G | C | G | C | G | G | T | A | C | T | T | A | T | A | C | A | G | C | A | G | T | A | C | A | T | A | - | - | C | A | - | G | A | G | C | A | A | T | G | C | C | G | A | G | G | T | T | G | T | G | A | G | T | T | C | G | A | G | C | C | T | C | A | C | C | T | G | G | A | G | C | A | C | G | A | - |
| tI(TAT)G  | - | G | C  | T | C  | C | A  | G | T   | G | G | C | G | C | A | A | T | C | G | G | T | T | A | G | C | G | C | G | G | T | A | C | T | T | A | T | A | T | G | T | C | A | G | T | G | C | T | A | A | - | G | C | T | A | A | G | C | G | A | T | G | C | C | G | A | G | G | T | T | G | T | G | A | G | T | T | C | G | A | T | C | C | T | C | A | C | C | T | G | G | A | G | C | A | C | T | A | - |   |
| tI(TAT)M  | T | G | C  | T | C  | C | A  | G | T   | G | G | C | G | C | A | A | T | C | G | G | T | T | A | G | C | G | C | G | G | T | A | C | T | T | A | T | A | C | A | A | C | A | G | T | G | T | G | A | G | C | G | C | G | A | G | A | G | C | G | A | T | G | C | C | G | A | G | G | T | T | G | T | G | A | G | T | T | C | G | A | G | C | C | T | C | A | C | C | T | G | G | A | G | C | A | T | T | A | A |



Leucine<sub>2</sub>

|           | 1                                                                                                                                                                             | 25 | 50 | 75 | 87 |
|-----------|-------------------------------------------------------------------------------------------------------------------------------------------------------------------------------|----|----|----|----|
| tL(AAG)G  | - G G T A G T G T G G C C G A G C G G T C T A A G G C G C T G G A T T A A G G C T C C A G T C T C T A C G G G G G C G T G G G T T C G A A T C C C A C C G C T G C C A A G A - |    |    |    |    |
| tL(AAG)M2 | - G G T A G T G T G G C C G A G C G G T C T A A G G C G C T G G A T T A A G G C T C C A G T C T C T A C G G G G G C G T G G G T T C G A A T C C C A C C A C T G C C A A C A - |    |    |    |    |
| tL(AAG)M1 | - G G T A G C G T G G C C G A G C G G T C T A A G G C G C T G G A T T A A G G C T C C A G T C T C T A C G G G G G C G T G G G T T C G A A T C C C A C C G C T G C C A A C A - |    |    |    |    |
| tL(AAG)N  | T G G T A G C G T G G C C G A G C G G T C T A A G G C G C T G G A T T A A G G C T C C A G T C T C A T C G G G G G C G T G G G T T C G A A T C C C A C C G C T G C C A T C T A |    |    |    |    |
| tL(AAG)K  | - G G T A G C G T G G C C G A G C G G T C T A A G G C G C T G G A T T A A G G C T C C A G T C T C T A C G G G G G C G T G G G T T C G A A T C C C A C C G C T G C C A G T A - |    |    |    |    |
| tL(TAG)K  | - G G T A G C G T G G C C G A G C G G T C T A A G G C G C T G G A T T T A G G C T C C A G T C T C T A C G G A G G C G T G G G T T C G A A T C C C A C C G C T G C C A G G A - |    |    |    |    |
| tL(TAG)N  | T G G T A G T G T G G C C G A G C G G T C T A A G G C G C T G G A T T T A G G C T C C A G T C T C A T C G G A G G C G T G G G T T C G A A T C C C A C C A C T G C C A G T G A |    |    |    |    |
| tL(TAG)G2 | - G G T A G C G T G G C C G A G T G G T C T A A G G C G C T G G A T T T A G G C T C C A G T C A T T A C G A T G G C G T G G G T T C G A A T C C C A C C G C T G C C A C A A - |    |    |    |    |
| tL(TAG)B  | - G G T A G C A T G G C C A A G T G G T C T A A A G C A C T G A A T T T A G G C T C C A G T C A T T A C G A T A G C A T G G G T T C G A G T C C C A C C A C T G C C A T A A - |    |    |    |    |

Leucine<sub>3</sub>

|             |                                                                                                                                                                                   |    |    |    |    |
|-------------|-----------------------------------------------------------------------------------------------------------------------------------------------------------------------------------|----|----|----|----|
|             | 1                                                                                                                                                                                 | 25 | 50 | 75 | 89 |
| tStop(TTA)M | T A C T G G G A T G G C T G A G T G G T T A A G G C C T T G G A C T T T A G A T C C A A T G G G C A G A T G C C T G C G T G G G T T C A A A C C C C A C T C C C A G T A T - T A A |    |    |    |    |
| tL(TAA)X1   | - G A T G G G A T G G C T G A G A G G T T A A G G C T T T G G A C T T A A G A T C C A A T G G G C A A A T G C C T G C G T G G G T T T G A A C C C C A C T C C C A A T A T - T A - |    |    |    |    |
| tL(TAA)M    | T A C T G G G A T G G C T G A G T G G T T A A G G C G T T G G A C T T A A G A T C C A A T G G G C A G T T G C C T G C G T G G G T T C G A A C C C C A C T C C C A G T A T G T A - |    |    |    |    |
| tL(TAA)J    | - A C C A G G A T G G C C G A G T G G T T A A G G C G T T G G A C T T A A G A T C C A A T G G A C A A A T G T C T G C G T G G G T T C G A A C C C C A C T C C T G G T A A A A - - |    |    |    |    |
| tL(TAA)S    | T A C C A G A A T G G C C G A G T G G T T A A G G C G T T G G A C T T A A G A T C C A A T G G A T A T A T A T C C G C G T G G G T T C G A A C C C C A C T T C T G G T A A A T A - |    |    |    |    |

# Lysine<sub>1</sub>

|            | 1                                                                                                                                                                     | 25                                                                                                                                                | 50 | 82 |
|------------|-----------------------------------------------------------------------------------------------------------------------------------------------------------------------|---------------------------------------------------------------------------------------------------------------------------------------------------|----|----|
| tK(CTT)A   | T G C C T G G - -                                                                                                                                                     | C T A G C T C A G T C C A T A G A G C A T G G G A C T C T T A A T C C C A G G G T C A T G G G T T C G A G C C C C A T A T T A G G C A C C A A - - |    |    |
| tK(CTT)Q1  | T G C C T G G - -                                                                                                                                                     | C T A G C T T A G T T G G T A A A G C A T A A G A C T C T T A A T C C T A G G G T C A T A A G T T T G A G C C C C A C A T T A G G C G C C A A - - |    |    |
| tK(CTT)G   | - G C C C A G - -                                                                                                                                                     | C T A C T T C A G T T G G T G G A G C A A G A G T C T C T T A A T C T C A G G G T C A A G G G T T C A A G C C C C A T G T T G G G T A C C A - - - |    |    |
| tK(CTT)P2  | - G C C C A G - -                                                                                                                                                     | C T A G C T T A G T T G G T A G A G C A T G A G A C T C T T A A T C T C A G A G T C A A G G G T T C A G G C C T C A T G T T T G G C A C C A - - - |    |    |
| tK(CTT)K1  | - A C C C A G - -                                                                                                                                                     | C T A G T T C A G T C G G T A G A G C A T G A G A C T C T T A A T C T T A G A G T C G A G G G C T C A G G T C C C A T G T T G G G T T C C A - - - |    |    |
| tK(CTT)I1  | - G T C C T G - -                                                                                                                                                     | C T G G C T C A G T C G G T A C A G C A T G G G A C T C T T A A T C C C A G G G T C G A G G G T T C G A G C T C C A C G T T G G G T A C C A - - - |    |    |
| tK(TTT)H   | - G C C T G G - -                                                                                                                                                     | T T A G C T C A G T C A G T A G A G T A T G A A A C T T T T A A T C T C A G G G T T G T A G G T T T G A G C C T C A C A T T G G G C A - - - - -   |    |    |
| tK(CTT)K2  | - G C C T G G - -                                                                                                                                                     | C T A G C T C A G T T G G T A G A G C A T G G A A C T C T T A A T C C C T G G G T T G T A A G T T T G A G C C T C A T G T A G G G C A - - - - -   |    |    |
| tK(CTT)Y   | T G C C C A G - -                                                                                                                                                     | C T A G C T C A G T C A G T A G A G C A G G A G A C T C T T A G T C T C G G G G T T A T A G G T T C G A G C C C C A C A G T G G G C A A G G A - - |    |    |
| tL(TAA)E2  | - - T C T G G - -                                                                                                                                                     | C T G G C T C A G T T G G T A G A G C T T G A G A C T - T A A A T C T C A G G G T T G C A G G T T T G A G T T - - C T G T T G G G G G T C A G A T |    |    |
| tK(CTT)Q4  | - G C T C G G - -                                                                                                                                                     | T T A G C T C A G T C G G T A G A G C A T G A G A C T C T T A T T C T C A G G G T T G A G G G T T T G A G T C T C C G T T A G G C G T C A - - -   |    |    |
| tK(CTT)P1  | T G C C C A G - -                                                                                                                                                     | C T A G C T C A G T C T G T A G A G C A T G A G A C T C T T A A T C T C A G G G T T A T A G G T T C G A G C C C C G C T A T G G G T G A G A A - - |    |    |
| tK(CTT)R   | T G C C C A G - -                                                                                                                                                     | C T A G C T C A G T C G G T A G A G C A T G A G A C T C T T A A T C T C A G G G T C A T A G G T T T G A G C C C C G A T A T G G G T G A G A A - - |    |    |
| tK(CTT)N   | T G C C C A G - -                                                                                                                                                     | C T C A C T C A G T C G G T A G A G C A T G A G A C T C T T A A T C T C A G G G T C A T A G G T T C G A G C C C C A T G G T G G G C G A G A A - - |    |    |
| tK(CTT)C1  | T G C C C A G - -                                                                                                                                                     | C T A G C T C A G T C T G T A G A G C A T G A G A C T C T T A G T C T C A G G G T C A T G G G T T G G A G C C C C A T G T T G T G C A A G A A - - |    |    |
| tK(TTT)P   | T G C C C A G - -                                                                                                                                                     | C C A G C T C A G T A G G T A G A G T A T G A G A C T T T T A A T C T C A G G G T G A T G G G T T C G A G C C C C A T G T T G G G G G A G A A - - |    |    |
| tK(CTT)C2  | T G C C C A G - -                                                                                                                                                     | C T A G C T C A G T C T G T A G A G C A T G A G A C T C T T A A T C T C A G G G T C A T G A G T T C G A G C C C C A C G T T G G G T G A G A A - - |    |    |
| tK(CTT)Q2  | C G C C C G G - -                                                                                                                                                     | C T A G C T C A G T C G G T A G A G C A T G A G A C T C T T A A T C T C A G G G T C A T G G G T T C G A G C C C C A C G T T G G G C G A G A A - - |    |    |
| tK(CTT)Q3  | C G C C C G G - -                                                                                                                                                     | C T A G C T C A G T C G G T A G A G C A T G A G A C T C T T A A T C T C A G G G T C A T G G G T T C G A G C C C C A C G T T G G G C G A G A A - - |    |    |
| tK(CTT)Q5  | C G C C C G G - -                                                                                                                                                     | C T A G C T C A G T C G G T A G A G C A T G A G A C T C T T A A T C T C A G G G T C A T G G G T T C G A G C C C C A C G T T G G G C G A G T A - - |    |    |
| tK(CTT)P3  | T C C C C G G - -                                                                                                                                                     | C T A G C T C A G T C A G T A G A G C T T G A G A A T C T T A A T C T C A G G G T C A T G G G T T G G A G C C C C A C G T T G G G C G A G A A - - |    |    |
| tK(CTT)C5  | T G C C C G G - -                                                                                                                                                     | C T A G C T C A G T C G G T A G A G C A T G A G A C T C T T A A T C T C A G G G T C A T G G G T T C G A G C C C C A C G T T G G G C G C A T A - - |    |    |
| tK(CTT)K3  | C G C C C G G - -                                                                                                                                                     | C T A G C T C A G T C G G T A G A G C A T G A G A C T C T T A A T C T C A G G G T C A T G G G T T C G A G C C C C A C G T T G G G C G C A T A - - |    |    |
| tK(CTT)M3  | T G C C C G G - -                                                                                                                                                     | C T A G C T C A G T C G G T A G A G C A T G A G A C T C T T A A T C T C A G G G T C A T G G G T T C G A G C C C C A C G T T G G G C G C A A A - - |    |    |
| tK(CTT)C6  | - G C C C G G - -                                                                                                                                                     | C T A G C T C A G T C G G T A G A G C A T G A G A C T C T T A A T C T C A G G G T C G A G G G T T C G A G C C C C A C G T T G G G C G C - T A - - |    |    |
| tK(CTT)J2  | T G C C C G G - -                                                                                                                                                     | C T A G C T C A G T C G G T A G A G C A T G G G A C T C T T A A T C C C A G G G T C A T G G G T T C G A G C C C C A C G T T G G G C G G T T A - - |    |    |
| tK(CTT)L   | T G C C C G G - -                                                                                                                                                     | C T A G C T C A G T C G G T A G A G C A T G G G A C T C T T A A T C C C A G G G T C A T G G G T T C G A G C C C C A C G T T G G G C G G T G A - - |    |    |
| tK(CTT)X2  | T G C C C A G - -                                                                                                                                                     | C T A G C T C A G T T G G T A G A G C G T G G G A C T C T T A A T C C T A G G G T C A T G G G T T C G A A C C C C A C G T T G G G C G G T T A - - |    |    |
| tSeC(TCA)E | - A C C C A G - -                                                                                                                                                     | C T A G C T C A G T G G G T A G A G C A T G A G A C T C - - A A T C T C A G G G T T G T G G G T T C G A G C C C C A C A T T G G G C G - - - - -   |    |    |
| tK(CTT)M1  | - A C A C T G - -                                                                                                                                                     | C T A G C T C A G T T G G T A G A G C A T G A G A C T C T T A A T C T C A G G G T C G T G G G T T C G A G C C T C A C G T T G G G C G - - - - -   |    |    |
| tK(CTT)M2  | T G T T G T A - -                                                                                                                                                     | A - A G C T C A G T T G T T A G A G C A T G A G A C T C T T A T T C T T A G G G T T G T G A G T T C G A G C C C C A C A T T G G A T A T - - - - - |    |    |
| tK(CTT)X1  | - - - G G T A - -                                                                                                                                                     | C T A G C T C A G T T G G T A G A G C T T G A G A C T C T T A A T C T C A G G A A C A T G G G T T C G A G C C C C A C A T T G G G T G C C A - - - |    |    |
| tK(CTT)C3  | - - - - - G - -                                                                                                                                                       | C C A G C T C A G T T G G T A G A G C A T G A G A C T C T T A A T C T C A G G G T C G T G G G T T C G A G C C C C A T A T T G G G G - - - - -     |    |    |
| tK(CTT)B   | A G C C T A G - -                                                                                                                                                     | C T A G T T C A G T C G G T A G A G C A T G A G A C T C T T A A T C T C A G G T T C A T G A G T T T G A G C C C C A T G T T G G T T T G G C A - - |    |    |
| tK(CTT)K5  | A A C C T G G - -                                                                                                                                                     | C T A G G T C A G T T G G T A G A T C A T G A G A C T C T T A A T C T C A G G G T C A T G G G T T C A A G C C C C A T G T T G G T T T G G C A - - |    |    |
| tK(CTT)E   | C A C C C G A - -                                                                                                                                                     | C T G G G T T A G T C A A T A G A A C A T G A G A C T C T T A A T C T C A G G G T T A T G G G T T T G A G C C C C A C C T T G G G T G G G T A - - |    |    |
| tK(CTT)K4  | - G C C C A A A A C T A G C T C A G T C A G T A G A G A T G A T A C T C T T A A T C T C A G G G T C A T G G G T T C A A A C C C C A C G T T G G G T G - - - - -       |                                                                                                                                                   |    |    |
| tK(CTT)M4  | - - - - - G A C T C C A G C C C A G T C A G T A G A G C A T G A G A C T C T T A A T C T C A G G G T C G T G G G T T C G A G C C C C A C G T T G G G T G C A - - - - - |                                                                                                                                                   |    |    |

Lysine<sub>2</sub>

|           | 1                                                                                                                                                               | 25 | 50 | 80 |
|-----------|-----------------------------------------------------------------------------------------------------------------------------------------------------------------|----|----|----|
| tK(TTT)A1 | - G C C C G G A T A G C T C - - A G T C G G T A G A G C A T C A G A C T T T T A A T C T G A G G G T C C A G G G T T C A A G T C C C T G T T C G G G C G - C T A |    |    |    |
| tK(TTT)A2 | C G C C C G G A T A G C T C - - A G T C G G T A G A G C A T C A G A C T T T T A A T C T G A G G G T C A A G G G T T C A A G T C C C T G T T C G G G C G G C T A |    |    |    |
| tK(TTT)K  | - G C C C G G A T A G C T C - - A G T C G G T A G A G C A T C A G A C T T T T A A T C T G A G G G T C C A G G G T T C A A G T C C C T G T T C G G G C G - C T A |    |    |    |
| tK(TTT)M1 | - G C C C G G A T A G C T C - - A G T C G G T A G A G C A T C A G A C T T T T A A T C T G A G G G T C C A G G G T T C A A G T C C C T G T T C G G G C G - C T A |    |    |    |
| tK(TTT)S1 | - G C C C G G A T A G C T C - - A G T C G G T A G A G C A T C A G A C T T T T A A T C T G A G G G T C C A G G G T T C A A G T C C C T G T T C G G G C G - C T A |    |    |    |
| tK(TTT)J  | - A C C T G G A T A G C T C - - A G T T G G T A G A G C A T C A G A C T T T T A A T C T G A G G C T C C A G G G T T C A A G T C C C T G T T C G A G C C - C T A |    |    |    |
| tK(TTT)G  | - G C C T G G A T A G C T C - - A G T C G G T A G A G C A T C A G A C T T T T A A T C T G A G G G T C C A G G G T T C A A G T C C C T G T T C A G G C G - G A A |    |    |    |
| tK(TTT)M2 | - G C C T G G A T A G C T C - - A G T C G G T A G A G C A T C A G A C T T T T A A T C T G A G G G T C C A G G G T T C A A G T C C C T G T T C A G G C G - G A A |    |    |    |
| tK(TTT)S2 | - G C C C G G A T A G C T C - - A G T C G G T A G A G C A T C A G A C T T T T A A T C T G A G G G T C C A G G G T T C A A G T C C C T G T T C G G G C G - G A A |    |    |    |
| tK(TTT)M3 | - G C C T G G A T A G C T C - - A A T T G G T A G A G C A T C A G A C T T T T A A T C T G A G G G T T C A G G G T T C A A G T C C C T G T T C A G G C G - C T A |    |    |    |
| tK(TTT)E  | A G C C T G G A T G G C T C T C G G T C A G T A G G A C A T C A G A C T T T T A A T C T G A G G G A C C A A G A T T C A A G T C C C T G T T C A G G T T C T T A |    |    |    |



Methionine<sub>1</sub>

|            | 1 | 25 | 50 | 77 |   |   |   |   |   |   |   |   |   |   |   |   |   |   |   |   |   |   |   |   |   |   |   |   |   |   |   |   |   |   |   |   |   |   |   |   |   |   |   |   |   |   |   |   |   |   |   |   |   |   |   |   |   |   |   |   |   |   |   |   |   |   |   |   |   |   |   |   |   |   |   |   |   |
|------------|---|----|----|----|---|---|---|---|---|---|---|---|---|---|---|---|---|---|---|---|---|---|---|---|---|---|---|---|---|---|---|---|---|---|---|---|---|---|---|---|---|---|---|---|---|---|---|---|---|---|---|---|---|---|---|---|---|---|---|---|---|---|---|---|---|---|---|---|---|---|---|---|---|---|---|---|---|
| tM(CAT)C   | T | A  | G  | C  | A | G | A | G | T | G | G | C | G | C | A | G | C | G | G | A | A | G | C | G | T | G | C | T | G | G | G | C | C | C | A | T | A | A | C | C | C | A | G | A | G | G | T | C | G | A | T | G | G | A | T | C | G | A | A | A | C | C | A | T | C | C | T | C | T | G | C | T | A | T | C | G | A |
| tM(CAT)M10 | T | A  | G  | C  | A | G | A | G | T | G | G | C | G | C | A | G | C | G | G | A | A | G | C | G | T | G | C | T | G | G | G | C | C | C | A | T | A | A | C | C | C | A | G | A | G | G | T | C | G | A | T | G | G | A | T | C | G | A | A | A | C | C | A | T | C | C | T | C | T | G | C | T | A | T | C | T | A |
| tM(CAT)M4  | T | A  | G  | C  | A | G | A | G | T | G | G | C | G | C | A | G | C | G | G | A | A | G | C | G | T | G | C | T | G | G | G | C | C | C | A | T | A | A | C | C | C | A | G | A | G | G | T | C | G | A | T | G | G | A | T | C | G | A | A | A | C | C | A | T | C | C | T | C | T | G | C | T | A | A | G | G | A |
| tM(CAT)M7  | T | A  | G  | C  | A | G | A | G | T | G | G | C | G | C | A | G | C | G | G | A | A | G | C | G | T | G | C | T | G | G | G | C | C | C | A | T | A | A | C | C | C | A | G | A | G | G | T | C | G | A | T | G | G | A | T | C | G | A | A | A | C | C | A | T | C | C | T | C | T | G | C | T | A | T | G | A | A |
| tM(CAT)M6  | - | A  | G  | C  | A | G | A | G | T | G | G | C | G | C | A | G | C | G | G | A | A | G | C | G | T | G | C | T | G | G | G | C | C | C | A | T | A | A | C | C | C | A | G | A | G | G | T | C | G | A | A | G | G | A | T | C | G | A | A | A | C | C | A | T | C | C | T | C | T | G | C | T | A | C | A | A | - |
| tM(CAT)M8  | - | A  | G  | C  | A | G | A | G | T | G | G | C | G | C | A | G | C | G | G | A | A | G | C | G | T | G | C | T | G | G | G | C | C | C | A | T | A | A | C | C | C | A | G | A | G | G | T | C | G | A | A | G | G | A | T | C | G | A | A | A | C | C | A | T | C | C | T | C | T | G | C | T | A | G | A | A | - |
| tM(CAT)M9  | - | A  | G  | C  | A | G | A | G | T | G | G | C | G | C | A | G | C | G | G | A | A | G | C | G | T | G | C | T | G | G | G | C | C | C | A | T | A | A | C | C | C | A | G | A | G | G | T | C | G | A | A | G | G | A | T | C | G | A | A | A | C | C | A | T | C | C | T | C | T | G | C | T | A | A | C | A | - |
| tM(CAT)O2  | - | A  | G  | C  | A | G | A | G | T | G | G | C | G | C | A | G | C | G | G | A | A | G | C | A | T | G | C | T | G | G | G | C | C | C | A | T | A | A | C | C | C | A | G | A | G | G | T | C | G | A | A | G | G | A | T | C | G | A | A | A | C | C | A | T | C | C | T | C | T | G | C | T | A | A | C | A | - |
| tM(CAT)M5  | T | A  | G  | C  | A | G | A | G | T | G | G | C | G | C | A | G | C | G | G | A | A | G | C | G | T | G | C | T | G | G | G | C | C | C | A | T | A | A | C | C | C | A | G | A | G | G | T | C | G | A | T | A | G | A | T | C | G | A | A | A | C | C | A | T | C | C | T | C | T | G | C | T | A | G | T | T | A |
| tM(CAT)X   | - | A  | G  | C  | A | G | A | G | T | G | G | C | A | C | A | A | T | G | G | A | A | G | C | G | T | G | C | T | G | G | T | C | C | C | A | T | A | A | C | C | C | A | G | A | G | G | T | C | A | A | T | G | G | A | T | T | G | A | A | A | C | C | A | T | C | C | T | C | T | G | C | T | T | - | - | - | - |

Methionine<sub>2</sub>

|           |   |   |    |   |    |   |    |   |   |   |   |   |   |   |   |   |   |   |   |   |   |   |   |   |   |   |   |   |   |   |   |   |   |   |   |   |   |   |   |   |   |   |   |   |   |   |   |   |   |   |   |   |   |   |   |   |   |   |   |   |   |   |   |   |   |   |   |   |   |   |   |   |   |   |   |   |   |   |
|-----------|---|---|----|---|----|---|----|---|---|---|---|---|---|---|---|---|---|---|---|---|---|---|---|---|---|---|---|---|---|---|---|---|---|---|---|---|---|---|---|---|---|---|---|---|---|---|---|---|---|---|---|---|---|---|---|---|---|---|---|---|---|---|---|---|---|---|---|---|---|---|---|---|---|---|---|---|---|---|
|           | 1 |   | 25 |   | 50 |   | 78 |   |   |   |   |   |   |   |   |   |   |   |   |   |   |   |   |   |   |   |   |   |   |   |   |   |   |   |   |   |   |   |   |   |   |   |   |   |   |   |   |   |   |   |   |   |   |   |   |   |   |   |   |   |   |   |   |   |   |   |   |   |   |   |   |   |   |   |   |   |   |   |
| tM(CAT)E  | T | G | C  | C | T  | C | C  | T | T | A | G | C | A | T | A | G | T | A | G | G | C | A | G | C | G | C | A | T | C | A | G | T | C | T | C | A | T | A | A | T | C | T | G | A | A | G | G | T | C | A | T | G | A | G | T | T | T | G | A | A | C | C | T | C | A | G | A | G | G | G | G | T | C | A | A | C | C | A |
| tM(CAT)M2 | T | G | C  | C | T  | C | C  | T | T | A | G | C | G | C | A | G | T | A | G | G | C | A | G | C | G | C | G | T | C | A | G | T | C | T | C | A | T | A | A | T | C | T | G | A | A | G | G | T | C | A | T | G | A | G | T | T | C | G | A | A | C | C | T | C | A | G | A | G | G | G | G | G | C | A | A | C | C | A |
| tM(CAT)M1 | T | G | C  | C | T  | C | C  | T | T | A | G | C | G | C | A | G | T | A | G | G | C | A | G | C | G | C | G | T | C | A | G | T | C | T | C | A | T | A | A | T | C | T | G | A | A | G | G | T | C | A | T | G | A | G | T | T | C | G | A | A | C | C | T | C | A | G | A | G | G | G | G | C | A | G | T | T | A |   |
| tM(CAT)K  | T | G | C  | C | T  | C | C  | T | T | A | G | T | G | T | A | G | T | A | G | G | C | A | T | T | G | C | G | T | C | A | G | T | C | T | C | A | T | A | A | T | C | T | G | A | A | G | G | T | C | A | T | G | A | G | T | T | C | A | A | G | C | C | T | C | A | G | A | G | T | G | G | G | C | A | A | A | C | A |
| tM(CAT)H  | - | G | C  | C | T  | C | G  | T | T | A | G | C | G | C | A | G | T | A | G | G | T | A | G | C | G | C | G | T | C | A | G | T | C | T | C | A | T | A | A | T | C | T | G | A | A | G | G | T | C | G | A | G | A | G | T | T | C | G | A | T | C | C | T | C | A | C | A | C | G | G | G | G | C | A | T | C | A | - |
| tM(CAT)O1 | T | G | C  | C | T  | C | G  | T | T | A | G | C | G | C | A | G | T | A | G | G | T | A | G | C | G | C | G | T | C | A | G | T | C | T | C | A | T | A | A | T | C | T | G | A | A | G | G | T | C | A | T | G | A | G | T | T | C | G | A | T | C | C | T | C | A | C | A | C | G | G | G | G | C | A | C | A | A | A |

Phenylalanine

|           | 1                                                                                                                                                                  | 25 | 50 | 78 |
|-----------|--------------------------------------------------------------------------------------------------------------------------------------------------------------------|----|----|----|
| tF(GAA)J  | - G C C G A A A T A G C T C A G T T G G G A G A G C G T T A G A C T G A A G A T C T A A A G G T C C A T G G T T C G A T C C C G G G T T T C G G C A A G A -        |    |    |    |
| tF(GAA)M2 | - G C C G A A A T A G C T C A G T T G G G A G A G C G T T A G A C T G A A G A T C T A A A G G T C C A T G G T T C A A T C C C G G G T T T C G G C A A A A -        |    |    |    |
| tF(GAA)M1 | - G C C G A A A T A G C T C A G T T G G G A G A G C G T T A G A C T G A A G A T C T A A A G G T C C A T G G T T C G A T C C C G G G T T T C G G C A A C A -        |    |    |    |
| tF(GAA)S2 | <b>T</b> G C T G A A A T A G C T C A G T T G G G A G A G C G T T A G A C T G A A G A T C T A A A G G T C A C T G G T T C G A T C C C G G G T T T C A G C A A A G A |    |    |    |
| tF(GAA)N  | - G C C G A A A T A G C T C A G T T G G G A G A G C G T T A G A C T G A A G A T C T A A A G G T C C A T G G T T C G A T C C C G G G T T T C G G C A G T A -        |    |    |    |
| tF(GAA)S1 | - G C C G A A A T A G C T C A G T T G G G A G A G C G T T A G A C T G A A G A T C T A A A G G T C C A T G G T T C G A T C C C G G G T T T C G G C A G T A -        |    |    |    |
| tS)GGA)K  | - G C T G A A A T A G C T C A G T T G G G A G A G C A T T A G A C T G G A G A T C T A A A G G T C C A T G G T T T G A T C C C G G G T T T C G G C A G T A -        |    |    |    |
| tF(GAA)E  | - G C C G A A A T A G C T C A G T T G G G A G A G C G T T A G A C T G A A G A T C T A A A G G T C C A T G G T T C G A T C C C G G G T T T C G G C A G C A -        |    |    |    |



Serine<sub>1</sub>

|           | 1 | 25 | 50 | 75 | 87 |   |   |   |   |   |   |   |   |   |   |   |   |   |   |   |   |   |   |   |   |   |   |   |   |   |   |   |   |   |   |   |   |   |   |   |   |   |   |   |   |   |   |   |   |   |   |   |   |   |   |   |   |   |   |   |   |   |   |   |   |   |   |   |   |   |   |   |   |   |   |   |   |   |   |   |   |   |   |   |   |   |   |
|-----------|---|----|----|----|----|---|---|---|---|---|---|---|---|---|---|---|---|---|---|---|---|---|---|---|---|---|---|---|---|---|---|---|---|---|---|---|---|---|---|---|---|---|---|---|---|---|---|---|---|---|---|---|---|---|---|---|---|---|---|---|---|---|---|---|---|---|---|---|---|---|---|---|---|---|---|---|---|---|---|---|---|---|---|---|---|---|---|
| tS(AGA)K  | T | G  | T  | A  | G  | T | C | G | T | G | G | C | C | G | A | G | T | G | G | T | T | A | A | G | G | C | G | A | T | G | G | A | C | T | A | G | A | A | A | T | C | C | A | T | T | G | G | G | G | A | C | T | C | C | C | C | G | C | G | C | A | G | G | T | T | C | G | A | A | T | C | C | T | G | C | C | G | A | C | T | A | C | G | T | C | T | A |
| tS(AGA)M1 | T | G  | T  | A  | G  | T | C | G | T | G | G | C | C | G | A | G | T | G | G | T | T | A | A | G | G | C | G | A | T | G | G | A | C | T | A | G | A | A | A | T | C | C | A | T | T | G | G | G | G | A | C | T | C | C | C | C | G | C | G | C | A | G | G | T | T | C | G | A | A | T | C | C | T | G | C | C | G | A | C | T | A | C | G | T | C | A | A |
| tS(AGA)M2 | T | G  | T  | A  | G  | T | C | G | T | G | G | C | C | G | A | G | T | G | G | T | T | A | A | G | G | C | G | A | T | G | G | A | C | T | A | G | A | A | A | T | C | C | A | T | T | G | G | G | G | A | C | T | C | C | C | C | G | C | G | C | A | G | G | T | T | C | G | A | A | T | C | C | T | G | C | C | G | A | C | T | A | C | G | T | A | A |   |
| tS(AGA)M5 | T | G  | T  | A  | G  | T | C | G | T | G | G | C | C | G | A | G | T | G | G | T | T | A | A | G | G | C | G | A | T | G | G | A | C | T | A | G | A | A | A | T | C | C | A | T | T | G | G | G | G | A | C | T | C | C | C | C | G | C | G | C | A | G | G | T | T | C | G | A | A | T | C | C | T | G | C | C | G | A | C | T | A | C | G | A | T | T | A |
| tS(AGA)M3 | T | G  | T  | A  | G  | T | C | G | T | G | G | C | C | G | A | G | T | G | G | T | T | A | A | G | G | C | G | A | T | G | G | A | C | T | A | G | A | A | A | T | C | C | A | T | T | G | G | G | G | A | T | T | C | C | C | C | G | C | G | C | A | G | G | T | T | C | G | A | A | T | C | C | T | G | C | C | G | A | C | T | A | C | G | G | T | A |   |
| tS(AGA)M4 | T | G  | T  | A  | G  | T | C | G | T | G | G | C | C | G | A | G | T | G | G | T | T | A | A | G | G | C | G | A | T | G | G | A | C | T | A | G | A | A | A | T | C | C | A | T | T | G | G | G | G | A | C | T | C | C | C | C | G | C | G | C | A | G | G | T | T | C | G | A | A | T | C | C | T | G | C | C | G | A | C | T | A | C | G | G | G | C | A |
| tS(TGA)M2 | T | G  | T  | A  | G  | T | C | G | T | G | G | C | C | G | A | G | T | G | G | T | T | A | A | G | G | C | G | A | T | G | G | A | C | T | T | G | A | A | A | T | C | C | A | T | T | G | G | G | G | A | T | T | C | C | C | C | G | C | G | C | A | G | G | T | T | C | G | A | A | T | C | C | T | G | C | C | G | A | C | T | A | C | G | T | G | A | A |
| tS(AGA)D  | - | G  | T  | A  | G  | T | C | G | T | G | G | C | C | G | A | G | T | G | G | T | T | A | A | G | G | C | G | A | T | G | G | A | C | T | A | G | A | A | A | T | C | C | A | T | T | G | G | G | G | T | A | T | C | C | C | C | G | C | G | C | A | G | G | T | T | C | G | A | A | T | C | C | T | G | C | C | G | A | C | T | A | C | G | G | A | A | - |
| tS(TGA)M1 | - | G  | T  | A  | G  | T | C | G | T | G | G | C | C | G | A | G | T | G | G | T | T | A | A | G | G | C | G | A | T | G | G | A | C | T | T | G | A | A | A | T | C | C | A | T | T | G | G | G | G | T | A | T | C | C | C | C | G | C | G | C | A | G | G | T | T | C | G | A | A | T | C | C | T | G | C | C | G | A | C | T | A | C | G | G | T | A | - |
| tS(AGA)X1 | - | G  | T  | A  | G  | T | C | G | T | G | G | C | C | A | A | G | T | G | A | G | T | A | A | G | G | C | A | A | T | G | G | A | C | T | A | G | A | A | A | T | C | C | A | T | T | G | G | G | G | T | A | T | C | C | C | A | G | C | A | C | A | G | G | T | T | C | A | A | A | T | C | C | T | G | C | T | G | A | C | T | A | T | G | G | T | A | - |
| tS(CGA)K  | - | G  | C  | T  | G  | T | G | A | T | G | G | C | C | G | A | G | T | G | G | T | T | A | A | G | G | C | G | T | T | G | G | A | C | T | C | G | A | A | A | T | C | C | A | A | T | G | G | G | G | T | A | T | C | C | C | C | G | C | G | C | A | G | G | T | T | C | G | A | A | T | C | C | T | G | C | T | C | A | C | A | G | C | G | C | T | A | - |
| tS(CGA)M  | - | G  | C  | T  | G  | T | G | A | T | G | G | C | C | G | A | G | T | G | G | T | T | A | A | G | G | C | G | T | T | G | G | A | C | T | C | G | A | A | A | T | C | C | A | A | T | G | G | G | T | T | A | T | T | C | C | C | G | C | G | C | A | G | G | T | T | C | A | A | A | T | C | C | T | G | C | T | C | A | C | A | G | C | G | T | A | A | - |
| tS(TGA)J  | - | G  | C  | A  | G  | C | G | A | T | G | G | C | C | G | A | G | T | G | G | T | T | A | A | G | G | C | G | T | T | G | G | A | C | T | T | G | A | A | A | T | C | C | A | A | T | G | G | G | G | T | A | T | C | C | C | C | G | C | G | C | A | G | G | T | T | C | G | A | A | C | C | C | T | G | C | T | C | G | C | T | G | C | G | G | A | A | - |
| tS(CGA)J  | - | G  | T  | C  | A  | C | G | G | T | G | G | C | C | G | A | G | T | G | G | T | T | A | A | G | G | C | G | T | T | G | G | A | C | T | C | G | A | A | A | T | C | C | A | A | T | G | G | G | G | T | A | T | C | C | C | C | G | C | A | C | A | G | G | T | T | C | G | A | A | T | C | C | T | G | T | T | C | G | T | G | A | C | G | G | C | A | - |

Serine<sub>2</sub>

|           | 1 | 25 | 50 | 75 | 87 |   |   |   |   |   |   |   |   |   |   |   |   |   |   |   |   |   |   |   |   |   |   |   |   |   |   |   |   |   |   |   |   |   |   |   |   |   |   |   |   |   |   |   |   |   |   |   |   |   |   |   |   |   |   |   |   |   |   |   |   |   |   |   |   |   |   |   |   |   |   |   |   |   |   |   |   |   |   |   |   |   |   |   |   |   |
|-----------|---|----|----|----|----|---|---|---|---|---|---|---|---|---|---|---|---|---|---|---|---|---|---|---|---|---|---|---|---|---|---|---|---|---|---|---|---|---|---|---|---|---|---|---|---|---|---|---|---|---|---|---|---|---|---|---|---|---|---|---|---|---|---|---|---|---|---|---|---|---|---|---|---|---|---|---|---|---|---|---|---|---|---|---|---|---|---|---|---|---|
| tS(GCT)M3 | T | G  | A  | C  | G  | A | G | G | T | G | G | C | C | G | A | G | T | G | G | T | T | A | A | G | G | C | G | A | T | G | G | A | C | T | G | C | T | A | A | T | C | C | A | T | T | G | T | G | C | A | C | T | G | C | A | C | G | C | G | T | G | G | G | T | T | C | G | A | A | T | C | C | C | A | T | C | C | T | C | G | T | C | G | G | T | C | A |   |   |   |
| tS(GCT)M4 | T | G  | A  | C  | G  | A | G | G | T | G | G | C | C | G | A | G | T | G | G | T | T | A | A | G | G | C | G | A | T | G | G | A | C | T | G | C | T | A | A | T | C | C | A | T | T | G | T | G | C | A | C | T | G | C | A | C | G | C | G | T | G | G | G | T | T | C | G | A | A | T | C | C | C | A | T | C | C | T | C | G | T | C | G | T | T | C | A |   |   |   |
| tS(GCT)S  | - | G  | A  | C  | G  | A | G | G | T | G | G | C | C | G | A | G | T | G | G | T | T | A | A | G | G | C | G | A | T | G | G | A | C | T | G | C | T | A | A | T | C | C | A | T | T | G | T | G | C | T | A | T | G | C | A | C | G | C | G | T | G | G | G | T | T | C | G | A | A | T | C | C | C | A | T | C | C | T | C | G | T | C | G | T | C | G | G | T | A | - |
| tS(GCT)K2 | - | G  | A  | C  | G  | A | G | G | T | G | G | C | C | G | A | G | T | G | G | T | T | A | A | G | G | C | G | A | T | G | G | A | C | T | G | C | T | A | A | T | C | C | A | T | T | G | T | G | C | T | A | T | G | C | A | C | G | C | G | T | G | G | G | T | T | C | G | A | A | T | C | C | C | A | T | C | C | T | C | G | T | C | G | T | C | A | - |   |   |   |
| tS(GCT)M2 | - | G  | A  | C  | G  | A | G | G | T | G | G | C | C | G | A | G | T | G | G | T | T | A | A | G | G | C | G | A | T | G | G | A | C | T | G | C | T | A | A | T | C | C | A | T | T | G | T | G | C | T | A | T | G | C | A | C | G | C | G | T | G | G | G | T | T | C | G | A | A | T | C | C | C | A | C | T | T | C | G | T | C | G | T | C | A | - |   |   |   |   |
| tS(GCT)M1 | - | G  | A  | T  | G  | A | G | G | T | G | G | C | C | G | A | G | T | G | G | T | T | A | A | G | G | C | G | A | T | G | G | A | C | T | G | C | T | A | A | T | C | C | A | T | T | G | T | G | C | T | A | T | G | C | A | C | G | C | A | T | G | G | G | T | T | C | G | A | A | T | C | C | C | A | T | C | C | T | C | A | T | C | G | A | C | A | - |   |   |   |
| tS(GCT)B1 | - | G  | A  | C  | G  | A | G | G | T | G | G | C | C | G | A | G | T | G | G | T | T | A | A | G | G | C | G | A | T | G | G | A | C | T | G | C | T | A | A | T | C | C | A | T | T | G | T | G | C | T | A | T | G | C | A | C | G | C | A | T | G | G | G | T | T | C | G | A | A | T | C | C | C | A | T | C | C | T | C | G | T | C | G | A | A | A | - |   |   |   |
| tS(GCT)A  | G | G  | A  | C  | G  | A | G | G | T | G | G | C | C | G | A | G | T | G | G | T | T | A | A | A | G | C | G | A | T | G | G | A | C | T | G | C | T | A | A | T | C | C | A | C | T | G | T | G | C | A | C | A | G | T | A | T | G | C | G | T | G | G | G | T | T | C | G | A | A | T | C | C | C | A | T | C | C | T | C | G | T | C | C | G | A | A | A |   |   |   |

# Threonine<sub>1</sub>

|           | 1                                                                                                                                                                                                 | 25 | 50 | 75 | 98                                                  |
|-----------|---------------------------------------------------------------------------------------------------------------------------------------------------------------------------------------------------|----|----|----|-----------------------------------------------------|
| tT(AGT)G  | - G G C G C C G T G G C T T A G T T G G T T A A A G C G C C T G T C T A G T A A A C A G G A G A T C A T G - - - - -                                                                               |    |    |    | G G T T C G A A T C C C A G C G G T G C C T G A A - |
| tT(AGT)N2 | - G G C A C C G T G G C T T A G T T G G T T A A A G C G C C T G T C T A G T A A A C A G G A G A T C A T G - - - - -                                                                               |    |    |    | G G T T C G A A T T C C A G C G G T G C C T G A A - |
| tT(AGT)K3 | - G G C G C C G T G G C T T A G C T G G T T A A A G C G C C T G T C T A G T A A A C A G G A G A T C A T G - - - - -                                                                               |    |    |    | G G T T C G A A T C C C A G C G G T G C C T G G A - |
| tT(AGT)K1 | - G G C G C C G T G G C T T A G T T G G T T A A A G C G C C T G T C T A G T A A A C A G G A G A T C A T G - - - - -                                                                               |    |    |    | G G T T C G A A T C C C A G C G G T G C C T T T A - |
| tT(AGT)K2 | A G G C G C C G T G G C T T A G T T G G T T A A A G C G C C T G T C T A G T A A A C A G G A G A T A C T G - - - - -                                                                               |    |    |    | G G T T C G A A T C C C A G C G G T G C C T T T G A |
| tT(AGT)M  | - G G C T C C G T G G C T T A G C T G G T T A A A G C G C C T G T C T A G T A A A C A G G A G A T C A T G - - - - -                                                                               |    |    |    | G G T T C G A A T C C C A G C G G G G C C T T T A - |
| tT(TGT)M1 | - G G C T C C A T G G C T T A G T T G G T T A A A G C G C C T G T C T T G T A A A C A G G A G A T C A T G - - - - -                                                                               |    |    |    | G G T T C G A A T C C C A G T G G G G C C T A T A - |
| tT(CGT)M2 | - G G C T C C A T G G C T T A G C T G G T T A A A G C G C C T G T C T C G T A A A C A G G A G A T C A T G - - - - -                                                                               |    |    |    | G G T T C G A C T C C C A G T G G G G C C T T C A - |
| tM(CAT)J  | - G G C T C T G T G G C T T A G T T G G C T A A A G T G C C T G T C T C A T A A A C A G G A G A T C A T G T T G T A A A C A G G A G A T C G T G G G T T G A A T C C C A G T G G G G C C T G A A - |    |    |    |                                                     |
| tT(CGT)M1 | - G G C T C C G T G G C T T A G T T G G C T A A A G C G C C T G T C T C G T A A A C A G G A G A T C A T G - - - - -                                                                               |    |    |    | G G T T C G A A T C C C A G T G G G G C C T G G A - |





Tryptophan

|           | 1                                                                                                                                                         | 25 | 50 | 77 |
|-----------|-----------------------------------------------------------------------------------------------------------------------------------------------------------|----|----|----|
| tW(CCA)J1 | T G A C C T C G T G G C A C A A T G G T A G C A C G T C T G A C T C C A G A T C A G A A G G T T G A G T G T T C A A A T C A C G T C G G G G T C A T G A A |    |    |    |
| tW(CCA)K2 | T G A C C T C G T G G C G C A A T G G T A G C G C G T C T G A C T C C A G A T C A G A A G G T T G A G T G T T C A A A T C A C G T C G G G G T C A T G A A |    |    |    |
| tW(CCA)K1 | T G A C C T C G T G G C G C A A T G G T A G C G C G T C T G A C T C C A G A T C A G A A G G T T G A G T G T T C A A G T C A C G T C G G G G T C A A G T A |    |    |    |
| tW(CCA)M2 | T G A C C T C G T G G C G C A A C G G T A G C G C G T C T G A C T C C A G A T C A G A A G G T T G A G T G T T C A A A T C A C G T C G G G G T C A A G T A |    |    |    |
| tW(CCA)M1 | T G A C C T C G T G G C G C A A C G G T A G C G C G T C T G A C T C C A G A T C A G A A G G T T G A G T G T T C A A A T C A C G T C G G G G T C A G T G A |    |    |    |
| tW(CCA)K3 | - G G C C T C G T G G C G C A A C G G T A G C G C G T C T G A C T C C A G A T C A G A A G G T T G C A T G T T C A A A T C A C G T C G G G G T C A T C A - |    |    |    |
| tW(CCA)K4 | - G G C C T C G T G G C G C A A C G G T A G C G C G T C T G A C T C C A G A T C A G A A G G T T G C A T G T T C A A A T C A C G T C G G G G T C A G C A - |    |    |    |
| tW(CCA)J2 | - G A C C T C G T G G C G C A A C G G T A G C G C G T C T G A C T C C A G A T C A G A A G G C T G C A T G T T C G A A T C A C G T C G G G G T C A T A A - |    |    |    |

# Tyrosine

|           | 1                                                                                                                                                                                                                               | 25 | 50 | 75 | 101 | 111 |
|-----------|---------------------------------------------------------------------------------------------------------------------------------------------------------------------------------------------------------------------------------|----|----|----|-----|-----|
| tY(GTA)C1 | - C C T T C G A T A G C T C A G C T G G T A G A G C G G A G G A C T G T A G C T A A - - C T C C C C G T A A G A A - - - - G A C A T C C T T A G G T C G C T G G T T C G A C T C C G G C T C G A A G G A G A A - - - - - - - -   |    |    |    |     |     |
| tY(GTA)N  | - C C T T C G A T A G C T C A G C T G G T A G A G C G G A G G A C T G T A G T T A - - - - C A T T C G T T - G A A - - - - G C C A T C C T T A G G T C G C T G G T T C G A T T C C G G C T C G A A G G A G T A - - - - - - - -   |    |    |    |     |     |
| tY(GTA)C2 | - C C T T C G A T A G C T C A G C T G G T A G A G C G G A G G A C T G T A G G C T T - - G T G G C T G T - - - - A - - - - G A C A T C C T T A G G T C G C T G G T T C G A T T C C G G C T C G A A G G A A A A - - - - - - - -   |    |    |    |     |     |
| tY(GTA)C3 | - C A T T C G A T A G C T C A G T T G G T A G A G C A G A A G A C T G T A G T T A - - - G T A C - - A A T A T - G - - - - G T A A T C C T T G G G T T G C T G G T T C G A T T C C A - T T C A A A G G A - - - - - - - -         |    |    |    |     |     |
| tY(GTA)E1 | - C C T T C G A T A G C T C A G T T G G T A G A G C G G A G G A C T G T A G T C A - - - G T A C - - A A T A T - A - - - - G T A A T C C T T A G G T C G C T G G T T C G A T T C C G G C T C G A A G G A C T A - - - - - - - -   |    |    |    |     |     |
| tY(GTA)M1 | T C C T T C G A T A G C T C A G T T G G T A G A G C G G A G G A C T G T A G A G - - - - T T A C T - A G A A A - A - - - - G T G A T C C T T A G G T C G C T G G T T C G A A T C C G G C T C G A A G G A A C G A - - - - - - - - |    |    |    |     |     |
| tY(GTA)M2 | T C C T T C G A T A G C T C A G T T G G T A G A G C G G A G G A C T G T A G A - - - - C T A C T - A A T G T - A - - - - G T G A T C C T T A G G T C G C T G G T T C G A A T C C G G C T C G A A G G A A T G A - - - - - - - -   |    |    |    |     |     |
| tY(GTA)M4 | - C T T T C G A T A G T T C A G T T G G T A G A G C G G A G G A C T G T A G A - - - - G T A T T - A A C G T T A - - - - G T G A T C C T T A G G T C G C T G G T T C G A G T C C G G C T C G A A G G A A - G A - - - - - - - -   |    |    |    |     |     |
| tY(GTA)M6 | T C C T T C G A T A G C T C A G T T G G T A G A G C G G A G G A C T G T A G G - A - - - G T A T T C G A C A T - G - - - - G A A A T C C T T A G G T C G C T G G T T C G A A T C C G G C T C G A A G G A G G T A - - - - - - - - |    |    |    |     |     |
| tY(GTA)M5 | T C C T T C G A T A G C T C A G T T G G T A G A G C G G A G G A C T G T A G G - - - - T C A T T - - G T T C T A - - - - G A A A T C C T T A G G T C G C T G G T T C G A A T C C G G C T C G A A G G A A C C A - - - - - - - -   |    |    |    |     |     |
| tY(GTA)M3 | - C C T T C G A T A G C T C A G T T G G T A G A G C G G A G G A C T G T A G - - - - - T A T A - G G T G T - T - - - - G A A A T C C T T A G G T C G C T G G T T C G A A T C C G G C T C G A A G G A G G A - - - - - - - -       |    |    |    |     |     |
| tY(GTA)J  | - C C T T C G A T A G C T C A G C T G G T A G A G C G G A G G A C T G T A G T C A A G A A A A A T G A A G A C T G A A G T G T G G A C A C T A T G C C C T C C T T A G A A G T G G G A A C A A A A C A C C C T T G G A A G G     |    |    |    |     |     |

Valine<sub>1</sub>

|           | 1                                                                                                                                                             | 25 | 50 | 79 |
|-----------|---------------------------------------------------------------------------------------------------------------------------------------------------------------|----|----|----|
| tV(CAC)A  | - G T T T C C G T A G T G T A G T G G T T A T C A C G T T C G C C T C A C A C - G C G A A A G G T C C A C G G T T C G A A A C C G G G C G G A A A C A G C A - |    |    |    |
| tV(CAC)M5 | - G T T T C C G T A G T G T A G T G G T T A T C A C G T T C G C C T C A C A C - G C G A A A G G T C C A C G G T T C G A A A C C G G G C G G A A A C A G T A - |    |    |    |
| tV(CAC)C1 | T G T T T C T G T A G T G T A G T G G T T - T C A C A T T T G C C T C A C A T - G C A A A A G G T C C A C G G T T C T C A A C C G G G C A G A A A C A A C T A |    |    |    |
| tV(CAC)X7 | - G T T T C A G T A G T G T A G T G G T T A T C A C G T T T G C C T C A C G C - A T G A A A T G T C C C C G G T T G G A A A C C T G G - G G A A A C A - - - - |    |    |    |
| tV(CAC)Q2 | - G T T T C C C T A G T G T A G T G G T T A T C A C G T T C G C C T C A C A T - G C A A A A G G T C C A T G G T T C G A A A C C T G G C G G A A A C A G T A - |    |    |    |
| tV(AAC)C  | - G T T T C C G T A G T G T A G T G G T T A T C A C G T T C G C C T A A C A C - G C G A A A G G T C C A C G G T T C G A A A C C G G G C G G A A A C A T A A - |    |    |    |
| tV(AAC)E  | - G T T T C C G T A G T G T A G T G G T T A T C A T G T T T G T C T A A C A C - G C G A A A G G T C C A C A G T T T G A A A C C G G G T G G A A A A A A A A - |    |    |    |
| tG)ACC)K  | - G T T T C C G T A G T G T A G T G G T T A G C G C G T T C G C C T A C C A A A G C G A A A G G T C A C C G G T T C G A A A C C G G G C G G A A A C A A A A - |    |    |    |
| tV(CAC)C3 | - G T T T C C G T A G T G T A G T G G T T A T C A C G T T C G C C T C A C A C - G C G A A A G G T C C A C G G T T C G A A A C C G G G C G G A A A C A A G A - |    |    |    |
| tV(CAC)F  | - G T T T C T G T A G T G T A G T G G T T A T C A C G T T C G C C T C A C A C - G C G A A A G G T C C A C G G T T C G A A A C C G G G C A G A A A C A A G A - |    |    |    |
| tV(AAC)K1 | - G T T T C C G T A G T G T A G T G G T T A T C A C G T T C G C C T A A C A C - G C G A A A G G T C C A C G G T T C G A A A C C G G G C G G A A A C A A G A - |    |    |    |
| tV(CAC)K1 | - G T T T C C G T A G T G T A G T G G T T A T C A C G T T C G C C T C A C A C - G C G A A A G G T C C A C G G T T C G A A A C C G G G C G G A A A C A A C A - |    |    |    |
| tV(CAC)M1 | T G T T T C C G T A G T G T A G T G G T T A T C A C G T T C G C C T C A C A C - G C G A A A G G T C A C C G G T T C G A A A C C G G G C G G A A A C A A T G A |    |    |    |
| tV(AAC)M1 | T G T T T C C G T A G T G T A G T G G T T A T C A C A T T C G C C T A A C A C - G C G A A A G G T C A C C G G T T C G A A A C C G G G C G G A A A C A C G T A |    |    |    |
| tV(CAC)M3 | - G T T T C C G T A G T G T A G T G G T T A T C A C G C T C G C C T C A C A C - G C G A G A G G T C C A C G G T T C G A A A C C G G G C G G A A A C A G T A - |    |    |    |
| tV(AAC)M2 | T G T T T C C G T A G T G T A G T G G T C A T C A C G C T C G C C T A A C A C - G C G A G A G G T C A C C G G T T C G A A A C C G G G C G G A A A C A T T A A |    |    |    |
| tV(AAC)M4 | T G T T T C C G T A G T G T A G T G G T C A T C A C G C T C G C C T A A C A C - G C G A G A G G T C A C C G G T T C G A A A C C G G G C G G G A A C A T T T A |    |    |    |
| tV(AAC)M5 | T G T T T C C G T A G T G T A G T G G T C A T C A C G C T C G C C T A A C A C - G C G A G A G G T C A C C G G T T C G A A A C C G G G C G G A A A C A T G G A |    |    |    |
| tV(CAC)M2 | T G T T T C C G T A G T G T A G T G G T C A T C A C G C T C G C C T C A C A C - G C G A G A G G T C A C C G G T T C G A A A C C G G G C G G G A A C A A C A A |    |    |    |
| tV(AAC)M3 | T G T T T C T G T A G T G T A G T G G T T A T C A C G C T C G C C T A A C A C - G C G A G A G G T C A C C G G T T C G A A A C C G G G C A G A A A C A G T G A |    |    |    |
| tV(CAC)M4 | T G T T T T G T A G T G T A G C G G T T A T C A C G C T C G C C T C A C A C - G C G A G A G G T C A T C G G T T C A A A A C C C A G T G G A A A C A T T T A   |    |    |    |

Valine<sub>2</sub>

1

25

50

78

tV(TAC)S2

T G G T T C C A T A G T G T A G C G G T T A T C A C G T C T G C T T T A C A C G C A G A A G G T C A T G G G T T C G A G C C C C A G T G G A A C C A G T G A

tV(TAC)X2

T G G T T C C A T A G T G T A G C G G T T A T C A C G T C T G C T T T A C A C G C A G A A G G T C A T G G G T T C G A G C C C C A G T G G A A C C A T A G A

tV(TAC)S1

- G G T T C C A T A G T G T A G C G G T T A T C A C G T C T G C T T T A C A C G C A G A A G G T C C A G G G T T C G A G C C C C A G T G G A A C C A C G A -



This table lists  
location and se  
encoded aminx  
the gene is loc:

**tRNA gene**  
name  
IA(AGC)M3  
IA(AGC)M4  
IA(AGC)M5  
IA(AGC)M6  
IA(CGC)B  
IA(CGC)M1  
IA(CGC)M2  
IA(CGC)X1  
IA(CGC)X3  
IA(CGC)X5  
IA(CGC)X7  
IA(CGC)X9  
IA(CGC)X11  
IV(TAC)X1  
IA(TGC)E1  
IA(TGC)E2  
IA(TGC)I  
IA(TGC)K  
IA(TGC)M  
IA(TGC)X2  
IA(TGC)X4  
IA(TGC)X6  
IA(TGC)X8  
IA(TGC)X10  
IA(TGC)X12  
IA(TGC)X14  
IA(TGC)X16  
IV(AAC)H  
IG(ACC)X1  
IA(AGC)A3  
IA(AGC)B4  
IA(AGC)E7  
IA(AGC)F4  
IA(AGC)F5  
IA(AGC)G3  
IA(AGC)G4  
IA(AGC)H1  
IA(AGC)H2  
IA(AGC)H6  
IA(AGC)J1  
IA(AGC)J4  
IA(AGC)J5  
IA(AGC)K4  
IA(AGC)L2  
IA(AGC)L3  
IA(AGC)O1  
IA(AGC)O2  
IA(AGC)O3  
IA(AGC)P  
IA(AGC)Q1  
IA(AGC)S4  
IA(AGC)X  
IA(AGC)C1  
IA(AGC)E3  
IA(AGC)M7  
IA(AGC)M8  
IA(AGC)M9  
IA(AGC)M10  
IA(AGC)M11  
IA(AGC)S1  
IR(ACG)C  
IR(ACG)I  
IR(ACG)M1  
IR(ACG)M2  
IR(ACG)M3  
IR(ACG)N  
IR(CCG)K  
IR(CCG)M  
IR(CCG)Q  
IR(TCG)G  
IR(TCG)K  
IR(TCG)M1  
IR(TCG)M2  
IR(TCG)M3  
IR(CCT)F  
IR(CCT)K1  
IR(CCT)K2  
IR(CCT)Q  
IR(CCT)X2  
IR(TCT)A  
IR(TCT)C  
IR(TCT)J  
IR(TCT)K  
IR(TCT)M  
IR(TCT)S  
IN(GTT)A1  
IN(GTT)A2  
IN(GTT)B  
IN(GTT)C1  
IN(GTT)C2  
IN(GTT)C3  
IN(GTT)C4  
IN(GTT)C5  
IN(GTT)C6  
IN(GTT)E3  
IN(GTT)H  
IN(GTT)J  
IN(GTT)K  
IN(GTT)O  
ID(GTC)A1  
ID(GTC)A2  
ID(GTC)A3  
ID(GTC)B  
ID(GTC)E1  
ID(GTC)E2  
ID(GTC)E3  
ID(GTC)J1  
ID(GTC)J2  
ID(GTC)K1  
ID(GTC)K2  
ID(GTC)M1  
ID(GTC)M2  
ID(GTC)M3  
IC(GCA)F1  
IC(GCA)F3  
IC(GCA)F4  
IC(GCA)F5  
IC(GCA)F6  
IC(GCA)F7  
IC(GCA)F8  
IC(GCA)F9  
IC(GCA)F10  
IC(GCA)F11  
IC(GCA)F12  
IC(GCA)F13  
IC(GCA)F14  
IC(GCA)F15  
IC(GCA)F16  
IC(GCA)F17  
IC(GCA)F18  
IC(GCA)F19  
IC(GCA)F20  
IC(GCA)F21  
IC(GCA)F22  
IC(GCA)F23  
IC(GCA)F24  
IC(GCA)F25  
IC(GCA)F26  
IC(GCA)F27  
IC(GCA)F28  
IC(GCA)F29  
IC(GCA)F30  
IC(GCA)F31  
IC(GCA)I1  
IC(GCA)I2  
IC(GCA)K1  
IC(GCA)K2  
IC(GCA)K3  
IC(GCA)K4  
IC(GCA)K5  
IC(GCA)Q  
IQ(CTG)B  
IQ(CTG)C1  
IQ(CTG)C2  
IQ(CTG)C3  
IQ(CTG)C4  
IQ(CTG)F  
IQ(CTG)I  
IQ(CTG)K  
IQ(CTG)M1  
IQ(CTG)M2  
IQ(TTG)C  
IQ(TTG)K1  
IQ(TTG)K2  
IQ(TTG)M1  
IQ(TTG)M2  
IQ(TTG)M3  
IQ(TTG)M4  
IQ(TTG)X1  
IA(CGC)D  
IE(CTC)A1  
IE(CTC)A2  
IE(CTC)A3  
IE(CTC)C1  
IE(CTC)C2  
IE(CTC)C3  
IE(CTC)G  
IE(CTC)H  
IE(CTC)J  
IE(CTC)K  
IE(CTC)L  
IE(CTC)M  
IE(CTC)Q  
IE(TTC)C4  
IE(TTC)C  
IE(TTC)A1  
IE(TTC)G  
IE(TTC)I  
IE(TTC)M  
IE(TTC)N1  
IE(TTC)N2  
IG(CCC)C1  
IG(CCC)C2  
IG(CCC)D  
IG(GCC)A1  
IG(GCC)A2  
IG(GCC)A3

This table lists  
location and se  
encoded aminc  
the gene is loc:

**tRNA gene**  
name  
IA(AGC)M3  
IA(AGC)M4  
IA(AGC)M5  
IA(AGC)M6  
IA(CGC)B  
IA(CGC)M1  
IA(CGC)M2  
IA(CGC)X1  
IA(CGC)X3  
IA(CGC)X5  
IA(CGC)X7  
IA(CGC)X9  
IA(CGC)X11  
IV(TAC)X1  
IA(TGC)E1  
IA(TGC)E2  
IA(TGC)I  
IA(TGC)K  
IA(TGC)M  
IA(TGC)X2  
IA(TGC)X4  
IA(TGC)X6  
IA(TGC)X8  
IA(TGC)X10  
IA(TGC)X12  
IA(TGC)X14  
IA(TGC)X16  
IV(AAC)H  
IG(ACC)X1  
IA(AGC)A3  
IA(AGC)B4  
IA(AGC)E7  
IA(AGC)F4  
IA(AGC)F5  
IA(AGC)G3  
IA(AGC)G4  
IA(AGC)H1  
IA(AGC)H2  
IA(AGC)H6  
IA(AGC)J1  
IA(AGC)J4  
IA(AGC)J5  
IA(AGC)K4  
IA(AGC)L2  
IA(AGC)L3  
IA(AGC)O1  
IA(AGC)O2  
IA(AGC)O3  
IA(AGC)P  
IA(AGC)Q1  
IA(AGC)S4  
IA(AGC)X  
IA(AGC)C1  
IA(AGC)E3  
IA(AGC)M7  
IA(AGC)M8  
IA(AGC)M9  
IA(AGC)M10  
IA(AGC)M11  
IA(AGC)S1  
IR(ACG)C  
IR(ACG)I  
IR(ACG)M1  
IR(ACG)M2  
IR(ACG)M3  
IR(ACG)N  
IR(CCG)K  
IR(CCG)M  
IR(CCG)Q  
IR(TCG)G  
IR(TCG)K  
IR(TCG)M1  
IR(TCG)M2  
IR(TCG)M3  
IR(CCT)F  
IR(CCT)K1  
IR(CCT)K2  
IR(CCT)Q  
IR(CCT)X2  
IR(TCT)A  
IR(TCT)C  
IR(TCT)J  
IR(TCT)K  
IR(TCT)M  
IR(TCT)S  
IN(GTT)A1  
IN(GTT)A2  
IN(GTT)B  
IN(GTT)C1  
IN(GTT)C2  
IN(GTT)C3  
IN(GTT)C4  
IN(GTT)C5  
IN(GTT)C6  
IN(GTT)E3  
IN(GTT)H  
IN(GTT)J  
IN(GTT)K  
IN(GTT)O  
ID(GTC)A1  
ID(GTC)A2  
ID(GTC)A3  
ID(GTC)B  
ID(GTC)E1  
ID(GTC)E2  
ID(GTC)E3  
ID(GTC)J1  
ID(GTC)J2  
ID(GTC)K1  
ID(GTC)K2  
ID(GTC)M1  
ID(GTC)M2  
ID(GTC)M3  
IC(GCA)F1  
IC(GCA)F3  
IC(GCA)F4  
IC(GCA)F5  
IC(GCA)F6  
IC(GCA)F7  
IC(GCA)F8  
IC(GCA)F9  
IC(GCA)F10  
IC(GCA)F11  
IC(GCA)F12  
IC(GCA)F13  
IC(GCA)F14  
IC(GCA)F15  
IC(GCA)F16  
IC(GCA)F17  
IC(GCA)F18  
IC(GCA)F19  
IC(GCA)F20  
IC(GCA)F21  
IC(GCA)F22  
IC(GCA)F23  
IC(GCA)F24  
IC(GCA)F25  
IC(GCA)F26  
IC(GCA)F27  
IC(GCA)F28  
IC(GCA)F29  
IC(GCA)F30  
IC(GCA)F31  
IC(GCA)I1  
IC(GCA)I2  
IC(GCA)K1  
IC(GCA)K2  
IC(GCA)K3  
IC(GCA)K4  
IC(GCA)K5  
IC(GCA)Q  
IQ(CTG)B  
IQ(CTG)C1  
IQ(CTG)C2  
IQ(CTG)C3  
IQ(CTG)C4  
IQ(CTG)F  
IQ(CTG)I  
IQ(CTG)K  
IQ(CTG)M1  
IQ(CTG)M2  
IQ(TTG)C  
IQ(TTG)K1  
IQ(TTG)K2  
IQ(TTG)M1  
IQ(TTG)M2  
IQ(TTG)M3  
IQ(TTG)M4  
IQ(TTG)X1  
IA(CGC)D  
IE(CTC)A1  
IE(CTC)A2  
IE(CTC)A3  
IE(CTC)C1  
IE(CTC)C2  
IE(CTC)C3  
IE(CTC)G  
IE(CTC)H  
IE(CTC)J  
IE(CTC)K  
IE(CTC)L  
IE(CTC)M  
IE(CTC)Q  
IE(TTC)C4  
IE(TTC)C  
IE(TTC)A1  
IE(TTC)G  
IE(TTC)I  
IE(TTC)M  
IE(TTC)N1  
IE(TTC)N2  
IG(CCC)C1  
IG(CCC)C2  
IG(CCC)D  
IG(GCC)A1  
IG(GCC)A2  
IG(GCC)A3

This table lists  
location and se  
encoded aminc  
the gene is loc:

**tRNA gene**  
name  
IA(AGC)M3  
IA(AGC)M4  
IA(AGC)M5  
IA(AGC)M6  
IA(CGC)B  
IA(CGC)M1  
IA(CGC)M2  
IA(CGC)X1  
IA(CGC)X3  
IA(CGC)X5  
IA(CGC)X7  
IA(CGC)X9  
IA(CGC)X11  
IV(TAC)X1  
IA(TGC)E1  
IA(TGC)E2  
IA(TGC)I  
IA(TGC)K  
IA(TGC)M  
IA(TGC)X2  
IA(TGC)X4  
IA(TGC)X6  
IA(TGC)X8  
IA(TGC)X10  
IA(TGC)X12  
IA(TGC)X14  
IA(TGC)X16  
IV(AAC)H  
IG(ACC)X1  
IA(AGC)A3  
IA(AGC)B4  
IA(AGC)E7  
IA(AGC)F4  
IA(AGC)F5  
IA(AGC)G3  
IA(AGC)G4  
IA(AGC)H1  
IA(AGC)H2  
IA(AGC)H6  
IA(AGC)J1  
IA(AGC)J4  
IA(AGC)J5  
IA(AGC)K4  
IA(AGC)L2  
IA(AGC)L3  
IA(AGC)O1  
IA(AGC)O2  
IA(AGC)O3  
IA(AGC)P  
IA(AGC)Q1  
IA(AGC)S4  
IA(AGC)X  
IA(AGC)C1  
IA(AGC)E3  
IA(AGC)M7  
IA(AGC)M8  
IA(AGC)M9  
IA(AGC)M10  
IA(AGC)M11  
IA(AGC)S1  
IR(ACG)C  
IR(ACG)I  
IR(ACG)M1  
IR(ACG)M2  
IR(ACG)M3  
IR(ACG)N  
IR(CCG)K  
IR(CCG)M  
IR(CCG)Q  
IR(TCG)G  
IR(TCG)K  
IR(TCG)M1  
IR(TCG)M2  
IR(TCG)M3  
IR(CCT)F  
IR(CCT)K1  
IR(CCT)K2  
IR(CCT)Q  
IR(CCT)X2  
IR(TCT)A  
IR(TCT)C  
IR(TCT)J  
IR(TCT)K  
IR(TCT)M  
IR(TCT)S  
IN(GTT)A1  
IN(GTT)A2  
IN(GTT)B  
IN(GTT)C1  
IN(GTT)C2  
IN(GTT)C3  
IN(GTT)C4  
IN(GTT)C5  
IN(GTT)C6  
IN(GTT)E3  
IN(GTT)H  
IN(GTT)J  
IN(GTT)K  
IN(GTT)O  
ID(GTC)A1  
ID(GTC)A2  
ID(GTC)A3  
ID(GTC)B  
ID(GTC)E1  
ID(GTC)E2  
ID(GTC)E3  
ID(GTC)J1  
ID(GTC)J2  
ID(GTC)K1  
ID(GTC)K2  
ID(GTC)M1  
ID(GTC)M2  
ID(GTC)M3  
IC(GCA)F1  
IC(GCA)F3  
IC(GCA)F4  
IC(GCA)F5  
IC(GCA)F6  
IC(GCA)F7  
IC(GCA)F8  
IC(GCA)F9  
IC(GCA)F10  
IC(GCA)F11  
IC(GCA)F12  
IC(GCA)F13  
IC(GCA)F14  
IC(GCA)F15  
IC(GCA)F16  
IC(GCA)F17  
IC(GCA)F18  
IC(GCA)F19  
IC(GCA)F20  
IC(GCA)F21  
IC(GCA)F22  
IC(GCA)F23  
IC(GCA)F24  
IC(GCA)F25  
IC(GCA)F26  
IC(GCA)F27  
IC(GCA)F28  
IC(GCA)F29  
IC(GCA)F30  
IC(GCA)F31  
IC(GCA)I1  
IC(GCA)I2  
IC(GCA)K1  
IC(GCA)K2  
IC(GCA)K3  
IC(GCA)K4  
IC(GCA)K5  
IC(GCA)Q  
IQ(CTG)B  
IQ(CTG)C1  
IQ(CTG)C2  
IQ(CTG)C3  
IQ(CTG)C4  
IQ(CTG)F  
IQ(CTG)I  
IQ(CTG)K  
IQ(CTG)M1  
IQ(CTG)M2  
IQ(TTG)C  
IQ(TTG)K1  
IQ(TTG)K2  
IQ(TTG)M1  
IQ(TTG)M2  
IQ(TTG)M3  
IQ(TTG)M4  
IQ(TTG)X1  
IA(CGC)D  
IE(CTC)A1  
IE(CTC)A2  
IE(CTC)A3  
IE(CTC)C1  
IE(CTC)C2  
IE(CTC)C3  
IE(CTC)G  
IE(CTC)H  
IE(CTC)J  
IE(CTC)K  
IE(CTC)L  
IE(CTC)M  
IE(CTC)Q  
IE(TTC)C4  
IE(TTC)C  
IE(TTC)A1  
IE(TTC)G  
IE(TTC)I  
IE(TTC)M  
IE(TTC)N1  
IE(TTC)N2  
IG(CCC)C1  
IG(CCC)C2  
IG(CCC)D  
IG(GCC)A1  
IG(GCC)A2  
IG(GCC)A3





**tRNA gene**

name  
IG(GCC)B  
IG(GCC)C  
IG(GCC)D2  
IG(GCC)G  
IG(GCC)H1  
IG(GCC)H2  
IG(GCC)H3  
IG(GCC)J  
IG(GCC)K1  
IG(GCC)M1  
IG(GCC)M2  
IG(TCC)A1  
IG(TCC)A2  
IG(TCC)A3  
IG(TCC)C  
IG(TCC)K  
IG(TCC)X1  
IG(CCC)F  
IG(CCC)Q  
IH(GTG)B1  
IH(GTG)B2  
IH(GTG)B3  
IH(GTG)C1  
IH(GTG)C2  
IH(GTG)C3  
IH(GTG)C4  
IH(GTG)C5  
IH(GTG)D  
II(AAT)D1  
II(AAT)H  
II(AAT)K1  
II(AAT)K2  
II(AAT)L  
II(AAT)M1  
II(AAT)M2  
II(AAT)M3  
II(AAT)M4  
II(AAT)M5  
II(AAT)M6  
II(AAT)P  
II(TAT)G  
II(TAT)M2  
II(TAT)M  
II(TAT)Q4  
IL(CAA)K1  
IL(CAA)M1  
IL(CAA)M  
IL(CAA)M2  
IL(CAG)A1  
IL(CAG)A2  
IL(CAG)A3  
IL(CAG)C2  
IL(CAG)H1  
IL(CAG)H2  
IL(CAG)H3  
IL(CAG)M3  
IL(AAG)G  
IL(AAG)K  
IL(AAG)M1  
IL(AAG)M2  
IL(AAG)N  
IL(TAG)B  
IL(TAG)G2  
IL(TAG)K  
IL(TAG)N  
IL(TAA)J  
IL(TAA)M  
IL(TAA)S  
IL(TAA)X1  
ISlop(TTA)M  
IK(CTT)A  
IK(CTT)B  
IK(CTT)C1  
IK(CTT)C2  
IK(CTT)C3  
IK(CTT)C5  
IK(CTT)C6  
IK(CTT)E  
IK(CTT)G  
IK(CTT)I1  
IK(CTT)I2  
IK(CTT)K1  
IK(CTT)K2  
IK(CTT)K3  
IK(CTT)K4  
IK(CTT)K5  
IK(CTT)L  
IK(CTT)M1  
IK(CTT)M2  
IK(CTT)M3  
IK(CTT)M4  
IK(CTT)N  
IK(CTT)P1  
IK(CTT)P2  
IK(CTT)P3  
IK(CTT)Q1  
IK(CTT)Q2  
IK(CTT)Q3  
IK(CTT)Q4  
IK(CTT)Q5  
IK(CTT)R  
IK(CTT)X1  
IK(CTT)X2  
IK(CTT)Y  
IL(TAA)E2  
ISec(TCA)E  
IK(TTT)P  
IK(TTT)P  
IK(TTT)A1  
IK(TTT)A2  
IK(TTT)E  
IK(TTT)G  
IK(TTT)J  
IK(TTT)K  
IK(TTT)M1  
IK(TTT)M2  
IK(TTT)M3  
IK(TTT)S1  
IK(TTT)S2  
IM(CAT)C  
IM(CAT)M4  
IM(CAT)M5  
IM(CAT)M6  
IM(CAT)M7  
IM(CAT)M8  
IM(CAT)M9  
IM(CAT)M10  
IM(CAT)O2  
IM(CAT)X  
IM(CAT)E  
IM(CAT)K  
IM(CAT)M1  
IM(CAT)M2  
IM(CAT)M3  
IM(CAT)H  
IM(CAT)O1  
IF(GAA)E  
IF(GAA)J  
IF(GAA)M1  
IF(GAA)M2  
IF(GAA)N  
IF(GAA)S1  
IF(GAA)S2  
IS(GGA)K  
IL(AAG)P  
IP(AGG)A2  
IP(AGG)A  
IP(AGG)C1  
IP(AGG)C2  
IP(AGG)F  
IP(AGG)G  
IP(AGG)M  
IP(AGG)N  
IP(AGG)Y  
IP(CGG)K  
IP(CGG)Q  
IP(GGG)Q  
IP(TGG)C  
IP(TGG)G  
IP(TGG)K1  
IP(TGG)K2  
IP(TGG)N  
IP(TGG)Q2  
IP(TGG)Q  
IP(TGG)X  
IP(TGG)Y  
IS(AGA)D  
IS(AGA)K  
IS(AGA)M1  
IS(AGA)M2  
IS(AGA)M3  
IS(AGA)M4  
IS(AGA)M5  
IS(AGA)X1  
IS(CGA)J  
IS(CGA)K  
IS(CGA)M  
IS(TGA)J  
IS(TGA)M1  
IS(TGA)M2  
IS(GCT)A  
IS(GCT)B1  
IS(GCT)K2  
IS(GCT)M1  
IS(GCT)M2  
IS(GCT)M3  
IS(GCT)M4  
IS(GCT)S  
IT(AGT)G  
IT(AGT)K1  
IT(AGT)K2  
IT(AGT)K3  
IT(AGT)M  
IT(AGT)N2  
IM(CAT)J  
IT(CGT)M1  
IT(CGT)M2  
IT(TGT)M1  
IT(CGT)K2  
IT(CGT)P  
IW(CCA)J1  
IW(CCA)J2  
IW(CCA)K1

**tRNA gene**

name  
IG(GCC)B  
IG(GCC)C  
IG(GCC)D2  
IG(GCC)G  
IG(GCC)H1  
IG(GCC)H2  
IG(GCC)H3  
IG(GCC)J  
IG(GCC)K1  
IG(GCC)M1  
IG(GCC)M2  
IG(TCC)A1  
IG(TCC)A2  
IG(TCC)A3  
IG(TCC)C  
IG(TCC)K  
IG(TCC)X1  
IG(CCC)F  
IG(CCC)Q  
IH(GTG)B1  
IH(GTG)B2  
IH(GTG)B3  
IH(GTG)C1  
IH(GTG)C2  
IH(GTG)C3  
IH(GTG)C4  
IH(GTG)C5  
IH(GTG)D  
II(AAT)D1  
II(AAT)H  
II(AAT)K1  
II(AAT)K2  
II(AAT)L  
II(AAT)M1  
II(AAT)M2  
II(AAT)M3  
II(AAT)M4  
II(AAT)M5  
II(AAT)M6  
II(AAT)P  
II(TAT)G  
II(TAT)M2  
II(TAT)M  
II(TAT)Q4  
IL(CAA)K1  
IL(CAA)M1  
IL(CAA)M  
IL(CAA)M2  
IL(CAG)A1  
IL(CAG)A2  
IL(CAG)A3  
IL(CAG)C2  
IL(CAG)H1  
IL(CAG)H2  
IL(CAG)H3  
IL(CAG)M3  
IL(AAG)G  
IL(AAG)K  
IL(AAG)M1  
IL(AAG)M2  
IL(AAG)N  
IL(TAG)B  
IL(TAG)G2  
IL(TAG)K  
IL(TAG)N  
IL(TAA)J  
IL(TAA)M  
IL(TAA)S  
IL(TAA)X1  
ISlop(TTA)M  
IK(CTT)A  
IK(CTT)B  
IK(CTT)C1  
IK(CTT)C2  
IK(CTT)C3  
IK(CTT)C5  
IK(CTT)C6  
IK(CTT)E  
IK(CTT)G  
IK(CTT)I1  
IK(CTT)I2  
IK(CTT)K1  
IK(CTT)K2  
IK(CTT)K3  
IK(CTT)K4  
IK(CTT)K5  
IK(CTT)L  
IK(CTT)M1  
IK(CTT)M2  
IK(CTT)M3  
IK(CTT)M4  
IK(CTT)N  
IK(CTT)P1  
IK(CTT)P2  
IK(CTT)P3  
IK(CTT)Q1  
IK(CTT)Q2  
IK(CTT)Q3  
IK(CTT)Q4  
IK(CTT)Q5  
IK(CTT)R  
IK(CTT)X1  
IK(CTT)X2  
IK(CTT)Y  
IL(TAA)E2  
ISec(TCA)E  
IK(TTT)P  
IK(TTT)P  
IK(TTT)A1  
IK(TTT)A2  
IK(TTT)E  
IK(TTT)G  
IK(TTT)J  
IK(TTT)K  
IK(TTT)M1  
IK(TTT)M2  
IK(TTT)M3  
IK(TTT)S1  
IK(TTT)S2  
IM(CAT)C  
IM(CAT)M4  
IM(CAT)M5  
IM(CAT)M6  
IM(CAT)M7  
IM(CAT)M8  
IM(CAT)M9  
IM(CAT)M10  
IM(CAT)O2  
IM(CAT)X  
IM(CAT)E  
IM(CAT)K  
IM(CAT)M1  
IM(CAT)M2  
IM(CAT)M3  
IM(CAT)H  
IM(CAT)O1  
IF(GAA)E  
IF(GAA)J  
IF(GAA)M1  
IF(GAA)M2  
IF(GAA)N  
IF(GAA)S1  
IF(GAA)S2  
IS(GGA)K  
IL(AAG)P  
IP(AGG)A2  
IP(AGG)A  
IP(AGG)C1  
IP(AGG)C2  
IP(AGG)F  
IP(AGG)G  
IP(AGG)M  
IP(AGG)N  
IP(AGG)Y  
IP(CGG)K  
IP(CGG)Q  
IP(GGG)Q  
IP(TGG)C  
IP(TGG)G  
IP(TGG)K1  
IP(TGG)K2  
IP(TGG)N  
IP(TGG)Q2  
IP(TGG)Q  
IP(TGG)X  
IP(TGG)Y  
IS(AGA)D  
IS(AGA)J  
IS(AGA)M1  
IS(AGA)M2  
IS(AGA)M3  
IS(AGA)M4  
IS(AGA)M5  
IS(AGA)X1  
IS(CGA)J  
IS(CGA)K  
IS(CGA)M  
IS(TGA)J  
IS(TGA)M1  
IS(TGA)M2  
IS(GCT)A  
IS(GCT)B1  
IS(GCT)K2  
IS(GCT)M1  
IS(GCT)M2  
IS(GCT)M3  
IS(GCT)M4  
IS(GCT)S  
IT(AGT)G  
IT(AGT)K1  
IT(AGT)K2  
IT(AGT)K3  
IT(AGT)M  
IT(AGT)N2  
IM(CAT)J  
IT(CGT)M1  
IT(CGT)M2  
IT(TGT)M1  
IT(CGT)K2  
IT(CGT)P  
IW(CCA)J1  
IW(CCA)J2  
IW(CCA)K1

**tRNA gene**

name  
IG(GCC)B  
IG(GCC)C  
IG(GCC)D2  
IG(GCC)G  
IG(GCC)H1  
IG(GCC)H2  
IG(GCC)H3  
IG(GCC)J  
IG(GCC)K1  
IG(GCC)M1  
IG(GCC)M2  
IG(TCC)A1  
IG(TCC)A2  
IG(TCC)A3  
IG(TCC)C  
IG(TCC)K  
IG(TCC)X1  
IG(CCC)F  
IG(CCC)Q  
IH(GTG)B1  
IH(GTG)B2  
IH(GTG)B3  
IH(GTG)C1  
IH(GTG)C2  
IH(GTG)C3  
IH(GTG)C4  
IH(GTG)C5  
IH(GTG)D  
II(AAT)D1  
II(AAT)H  
II(AAT)K1  
II(AAT)K2  
II(AAT)L  
II(AAT)M1  
II(AAT)M2  
II(AAT)M3  
II(AAT)M4  
II(AAT)M5  
II(AAT)M6  
II(AAT)P  
II(TAT)G  
II(TAT)M2  
II(TAT)M  
II(TAT)Q4  
IL(CAA)K1  
IL(CAA)M1  
IL(CAA)M  
IL(CAA)M2  
IL(CAG)A1  
IL(CAG)A2  
IL(CAG)A3  
IL(CAG)C2  
IL(CAG)H1  
IL(CAG)H2  
IL(CAG)H3  
IL(CAG)M3  
IL(AAG)G  
IL(AAG)K  
IL(AAG)M1  
IL(AAG)M2  
IL(AAG)N  
IL(TAG)B  
IL(TAG)G2  
IL(TAG)K  
IL(TAG)N  
IL(TAA)J  
IL(TAA)M  
IL(TAA)S  
IL(TAA)X1  
ISlop(TTA)M  
IK(CTT)A  
IK(CTT)B  
IK(CTT)C1  
IK(CTT)C2  
IK(CTT)C3  
IK(CTT)C5  
IK(CTT)C6  
IK(CTT)E  
IK(CTT)G  
IK(CTT)I1  
IK(CTT)I2  
IK(CTT)K1  
IK(CTT)K2  
IK(CTT)K3  
IK(CTT)K4  
IK(CTT)K5  
IK(CTT)L  
IK(CTT)M1  
IK(CTT)M2  
IK(CTT)M3  
IK(CTT)M4  
IK(CTT)N  
IK(CTT)P1  
IK(CTT)P2  
IK(CTT)P3  
IK(CTT)Q1  
IK(CTT)Q2  
IK(CTT)Q3  
IK(CTT)Q4  
IK(CTT)Q5  
IK(CTT)R  
IK(CTT)X1  
IK(CTT)X2  
IK(CTT)Y  
IL(TAA)E2  
ISec(TCA)E  
IK(TTT)P  
IK(TTT)P  
IK(TTT)A1  
IK(TTT)A2  
IK(TTT)E  
IK(TTT)G  
IK(TTT)J  
IK(TTT)K  
IK(TTT)M1  
IK(TTT)M2  
IK(TTT)M3  
IK(TTT)S1  
IK(TTT)S2  
IM(CAT)C  
IM(CAT)M4  
IM(CAT)M5  
IM(CAT)M6  
IM(CAT)M7  
IM(CAT)M8  
IM(CAT)M9  
IM(CAT)M10  
IM(CAT)O2  
IM(CAT)X  
IM(CAT)E  
IM(CAT)K  
IM(CAT)M1  
IM(CAT)M2  
IM(CAT)M3  
IM(CAT)H  
IM(CAT)O1  
IF(GAA)E  
IF(GAA)J  
IF(GAA)M1  
IF(GAA)M2  
IF(GAA)N  
IF(GAA)S1  
IF(GAA)S2  
IS(GGA)K  
IL(AAG)P  
IP(AGG)A2  
IP(AGG)A  
IP(AGG)C1  
IP(AGG)C2  
IP(AGG)F  
IP(AGG)G  
IP(AGG)M  
IP(AGG)N  
IP(AGG)Y  
IP(CGG)K  
IP(CGG)Q  
IP(GGG)Q  
IP(TGG)C  
IP(TGG)G  
IP(TGG)K1  
IP(TGG)K2  
IP(TGG)N  
IP(TGG)Q2  
IP(TGG)Q  
IP(TGG)X  
IP(TGG)Y  
IS(AGA)D  
IS(AGA)K  
IS(AGA)M1  
IS(AGA)M2  
IS(AGA)M3  
IS(AGA)M4  
IS(AGA)M5  
IS(AGA)X1  
IS(CGA)J  
IS(CGA)K  
IS(CGA)M  
IS(TGA)J  
IS(TGA)M1  
IS(TGA)M2  
IS(GCT)A  
IS(GCT)B1  
IS(GCT)K2  
IS(GCT)M1  
IS(GCT)M2  
IS(GCT)M3  
IS(GCT)M4  
IS(GCT)S  
IT(AGT)G  
IT(AGT)K1  
IT(AGT)K2  
IT(AGT)K3  
IT(AGT)M  
IT(AGT)N2  
IM(CAT)J  
IT(CGT)M1  
IT(CGT)M2  
IT(TGT)M1  
IT(CGT)K2  
IT(CGT)P  
IW(CCA)J1  
IW(CCA)J2  
IW(CCA)K1



**tRNA gene**

name  
W(CCA)K2  
W(CCA)K3  
W(CCA)K4  
W(CCA)M1  
W(CCA)M2  
Y(GTA)C1  
Y(GTA)C2  
Y(GTA)C3  
Y(GTA)E1  
Y(GTA)J  
Y(GTA)M1  
Y(GTA)M2  
Y(GTA)M3  
Y(GTA)M4  
Y(GTA)M5  
Y(GTA)M6  
Y(GTA)N  
V(AAC)C  
V(AAC)E  
V(AAC)K1  
V(AAC)M1  
V(AAC)M2  
V(AAC)M3  
V(AAC)M4  
V(AAC)M5  
V(GAC)K  
V(GAC)A  
V(GAC)C1  
V(GAC)C3  
V(GAC)F  
V(GAC)K1  
V(GAC)M1  
V(GAC)M2  
V(GAC)M3  
V(GAC)M4  
V(GAC)M5  
V(GAC)Q2  
V(GAC)X7  
V(TAC)S1  
V(TAC)S2  
V(TAC)X2  
V(AAC)K2  
H(AAT)G  
I(GAC)E  
I(SAG)N  
I(PAG)P  
I(HAT)A  
I(NATT)X  
L(CAA)K CAGCGATCTGGTCAGA  
V(CAC)N  
I(GCC)I  
I(TC)T  
I(FGA)O 1GAAAACACACGGTGGGACTCGTGGTTCTAGTGCAAATGTAGCAGAAGATGGCCCTAGTCGGTCATCAATGGGAGGAGAGGCCCTAATACTGTGAAGTTAAATGCCCCAGTATAGGGGACTGCAAGGGCCAGGAAGAAGGAGTGTGTACTGGCTAGTTTTGTGCAACTGA  
I(A)G(C)H2  
I(A)G(C)O1  
I(T)G(T)J  
Y(GTA)B :TCTGGGTTCAATTCTCAGTATGCCCAA  
V(TAC)G  
I(Sec)(TCA)G  
I(S)T(GA)X  
I(A)T(GC)S  
I(T)G(T)E1 :GTA  
I(T)G(T)O  
I(T)G(T)X2

**tRNA gene**

name  
W(CCA)K2  
W(CCA)K3  
W(CCA)K4  
W(CCA)M1  
W(CCA)M2  
Y(GTA)C1  
Y(GTA)C2  
Y(GTA)C3  
Y(GTA)E1  
Y(GTA)J  
Y(GTA)M1  
Y(GTA)M2  
Y(GTA)M3  
Y(GTA)M4  
Y(GTA)M5  
Y(GTA)M6  
Y(GTA)N  
V(AAC)C  
V(AAC)E  
V(AAC)K1  
V(AAC)M1  
V(AAC)M2  
V(AAC)M3  
V(AAC)M4  
V(AAC)M5  
V(GAC)K  
V(GAC)A  
V(GAC)C1  
V(GAC)C3  
V(GAC)F  
V(GAC)K1  
V(GAC)M1  
V(GAC)M2  
V(GAC)M3  
V(GAC)M4  
V(GAC)M5  
V(GAC)Q2  
V(GAC)X7  
V(TAC)S1  
V(TAC)S2  
V(TAC)X2  
V(AAC)K2  
H(AAT)G  
I(GAC)E  
I(SAG)N  
I(PAG)P  
I(HAT)A  
I(NATT)X  
L(CAA)K  
V(CAC)N  
I(GCC)I  
I(TCGT)X  
I(FGAA)O  
I(A(GGC)H2  
I(A(GGC)O1  
I(TGGT)J  
Y(GTA)B  
V(TAC)G  
I(Sec(TCA)G  
I(SITGA)X  
I(AITGC)S  
I(TTGT)E1  
I(TTGT)O  
I(TTGT)X2

CACAGGTGGAGTAATCACAGAGAAGGAGCTTCAGTTGAGGAAATGCCTCCATGAGATCCAGCATTAAAGGCATTTCTCAATTAGTGATCAAGGGGAAAGGCCCTTGTTGGGAGGACCATCTCTGGGCTGGTAGTCTTGGGTTCTATAAGAGAGCAGGCTGAGCAAGCCAGI

tRNA gene

name

W(CCA)K2  
W(CCA)K3  
W(CCA)K4  
W(CCA)M1  
W(CCA)M2  
Y(GTA)C1  
Y(GTA)C2  
Y(GTA)C3  
Y(GTA)E1  
Y(GTA)J  
Y(GTA)M1  
Y(GTA)M2  
Y(GTA)M3  
Y(GTA)M4  
Y(GTA)M5  
Y(GTA)M6  
Y(GTA)N  
V(AAC)C  
V(AAC)E  
V(AAC)K1  
V(AAC)M1  
V(AAC)M2  
V(AAC)M3  
V(AAC)M4  
V(AAC)M5  
V(GAC)K  
V(CAC)A  
V(CAC)C1  
V(CAC)C3  
V(CAC)F  
V(CAC)K1  
V(CAC)M1  
V(CAC)M2  
V(CAC)M3  
V(CAC)M4  
V(CAC)M5  
V(CAC)Q2  
V(CAC)X7  
V(TAC)S1  
V(TAC)S2  
V(TAC)X2  
V(AAC)K2  
H(AAT)G  
I(GAC)E  
I(SAG)N  
I(PAG)P  
I(HAT)A  
I(NATT)X  
L(CAA)K  
V(CAC)N  
I(GCC)I  
I(TCGT)X  
I(FGAA)O  
I(A(GGC)H2  
I(A(GGC)O1  
I(TGGT)J  
Y(GTA)B  
V(TAC)G  
I(Sec(TCA)G  
I(SITGA)X  
I(ATGC)S  
I(TTGT)E1  
I(TTGT)O  
I(TTGT)X2

GAGAAAGCAAGCCAGTAAAGAACATCCCTCCATGGCCTCTGAATCAGCTCCTGCTTCTGACCTGCTTGAGTTCTATTCCGACTTCCTTGATA



Supplemental Figure S4

This table lists the predicted human tRNA gene families that were verified as expressed by northern blot, along with the gene location and sequence. tRNA genes are named with a lower case t to indicate tRNA, followed by the single character abbreviation for the encoded amino acid. The anticodon is shown parenthetically. The letter following the parenthesis corresponds to the chromosome where the gene is located, and a number follows if there are multiple tRNA genes with the same anticodon on an individual chromosome.

| tRNA gene name | tRNA family | Chromo some | Sequence Start | Sequence End | aa type | Antico don | Intron | tRNA gene sequence (including introns)                                    |
|----------------|-------------|-------------|----------------|--------------|---------|------------|--------|---------------------------------------------------------------------------|
| tV(AAC)F5      | Hs_Ala1     | 6           | 28811256       | 28811185     | Val     | AAC        |        | GGGGGTGTAGCTCAGTGGTAGAGCGTATGCTTAACATTCATGAGGCTCTGGGTTTCGATCCCCAGCACTTCCA |
| tA(AGC)F12     | Hs_Ala1     | 6           | 28682912       | 28682983     | Ala     | AGC        |        | GGGGGTGTAGCTCAGTGGTAGAGCGCGTGCTTAGCATGTACGAGGTCCCAGGTTCAATCCCCGGCACCTCCA  |
| tA(AGC)F14     | Hs_Ala1     | 6           | 28786345       | 28786416     | Ala     | AGC        |        | GGGGGTGTAGCTCAGTGGTAGAGCGCGTGCTTAGCATGCACGAGGCCCTGGGTTCAATCCCCAGCACCTCCA  |
| tA(AGC)F15     | Hs_Ala1     | 6           | 28795460       | 28795531     | Ala     | AGC        |        | GGGGGTGTAGCTCAGTGGTAGAGCGCGTGCTTAGCATGCACGAGGCCCGGGTTCAATCCCTGGCACCTCCA   |
| tA(AGC)F16     | Hs_Ala1     | 6           | 28871791       | 28871720     | Ala     | AGC        |        | GGGGGTATAGCTCAGTGGTAGAGCGCGTGCTTAGCATGCACGAGGTCCTGGGTTTCGATCCCCAGTACCTCCA |
| tA(AGC)F17     | Hs_Ala1     | 6           | 28887899       | 28887828     | Ala     | AGC        |        | GGGGGTATAGCTCAGCGGTAGAGCGCGTGCTTAGCATGCACGAGGTCCTGGGTTCAATCCCCAATACCTCCA  |
| tA(AGC)F18     | Hs_Ala1     | 6           | 28914271       | 28914200     | Ala     | AGC        |        | GGGGGTGTAGCTCAGTGGTAGAGCGCGTGCTTAGCATGCACGAGGCCCGGGTTCAATCCCCGGCACCTCCA   |
| tA(AGC)F19     | Hs_Ala1     | 6           | 28939512       | 28939441     | Ala     | AGC        |        | GGGGGTGTAGCTCAGTGGTAGAGCGCGTGCTTAGCATGCACGAGGCCCGGGTTCAATCCCCGGCACCTCCA   |
| tA(CGC)F1      | Hs_Ala1     | 6           | 26661710       | 26661781     | Ala     | CGC        |        | GGGGATGTAGCTCAGTGGTAGAGCGCATGCTTCGCATGTATGAGGTCCCAGGTTTCGATCCCCGGCATCTCCA |
| tA(CGC)F2      | Hs_Ala1     | 6           | 28749663       | 28749592     | Ala     | CGC        |        | GGGGATGTAGCTCAGTGGTAGAGCGCATGCTTCGCATGTATGAGGCCCGGGTTTCGATCCCCGGCATCTCCA  |
| tA(CGC)F3      | Hs_Ala1     | 6           | 28771759       | 28771688     | Ala     | CGC        |        | GGGGGTGTAGATCAGTGGTAGAGCGCATGCTTCGCATGTACGAGGTCCCTGGTTCAATCCCTGGTACCTCCA  |
| tA(CGC)F       | Hs_Ala1     | 6           | 28805071       | 28805142     | Ala     | CGC        |        | GGGGGTGTAGCTCAGTGGTAGAGCGCGTGCTTCGCATGTACGAGGCCCGGGTTTCGACCCCCGGCTCTCCA   |
| tA(CGC)B       | Hs_Ala1     | 2           | 157082789      | 157082860    | Ala     | CGC        |        | GGGGATGTAGCTCAGTGGTAGAGCGCGCTTCGCATGTGTGAGGTCCCAGGTTCAATCCCCGGCATCTCCA    |
| tA(TGC)F1      | Hs_Ala1     | 6           | 28719201       | 28719272     | Ala     | TGC        |        | GGGGATGTAGCTCAGTGGTAGAGCGCATGCTTTGCATGTATGAGGTCCCAGGTTTCGATCCCCGGCATCTCCA |
| tA(TGC)F2      | Hs_Ala1     | 6           | 28834191       | 28834120     | Ala     | TGC        |        | GGGGGTGTAGCTCAGTGGTAGAGCACATGCTTTGCATGTGTGAGGCCCGGGTTTCGATCCCCGGCACCTCCA  |
| tA(TGC)F3      | Hs_Ala1     | 6           | 28865597       | 28865526     | Ala     | TGC        |        | GGGGGTGTAGCTCAGTGGTAGAGCGCATGCTTTGCATGTATGAGGTCCCAGGTTTCGATCCCCGGCACCTCCA |
| tA(TGC)F4      | Hs_Ala1     | 6           | 28878626       | 28878556     | Ala     | TGC        |        | GGGGGTGTAGCTCAGTGGTAGAGCGCATGCTTTGCATGTATGAGGCCCTCGGTTTCGATCCCCGACACCTCCA |
| tA(TGC)F5      | Hs_Ala1     | 6           | 28893062       | 28892991     | Ala     | TGC        |        | GGGGGTGTAGCTCAGTGGTAGAGCGCATGCTTTGCATGTATGAGGCCCTCGGTTTCGATCCCCGACACCTCCA |
| tA(TGC)K       | Hs_Ala1     | 11          | 50190526       | 50190455     | Ala     | TGC        |        | GGGGGTGTAGCTCAGTGGTAGAGCGGATGCTTTGCATGTATGAGACTTTGGGTTGGATCCCCAGCACCTCCA  |
| tA(TGC)L1      | Hs_Ala1     | 12          | 123931252      | 123931181    | Ala     | TGC        |        | GGGGATGTAGCTCAGTGGTAGAGCGCATGCTTTGCATGTATGAGGCCCGGGTTTCGATCCCCGGCATCTCCA  |
| tA(TGC)L2      | Hs_Ala1     | 12          | 123949392      | 123949463    | Ala     | TGC        |        | GGGGATGTAGCTCAGTGGTAGAGCGCATGCTTTGCATGTATGAGGCCCGGGTTTCGATCCCCGGCATCTCCA  |
| tA(TGC)E       | Hs_Ala1     | 5           | 180566474      | 180566545    | Ala     | TGC        |        | GGGGATGTAGCTCAGTGGTAGAGCGCATGCTTTGCATGTATGAGGCCCGGGTTTCGATCCCCGGCATCTCCA  |
| tA(AGC)F1      | Hs_Ala2     | 6           | 26680143       | 26680071     | Ala     | AGC        |        | GGGGAATTAGCTCAAATGGTAGAGCGCTCGCTTAGCATGCGAGAGGTAGCGGGATCGATGCCCCGATTCTCCA |
| tA(AGC)F6      | Hs_Ala2     | 6           | 26836235       | 26836307     | Ala     | AGC        |        | GGGGAATTGGCTCAAGCGGTAGAGCGCTTGCTTAGCATGCAAGAGGTAGCAGGATCGACGCCTGCACTCTCCA |
| tA(AGC)F7      | Hs_Ala2     | 6           | 26838716       | 26838788     | Ala     | AGC        |        | GGGGAATTAGCTCAGGCGGTAGAGCGCTCGCTTAGCATGCGAGAGGTAGCGGGATCGACGCCCGCATTCTCCA |
| tA(AGC)F8      | Hs_Ala2     | 6           | 26859897       | 26859969     | Ala     | AGC        |        | GGGGGATTAGCTCAAGCGGTAGGGTGCCTGCTTAGCATGCAAGAGGTAGCAGGATCGACGCCTGCATTCTCCA |
| tA(AGC)F9      | Hs_Ala2     | 6           | 26879341       | 26879269     | Ala     | AGC        |        | GGGGAATTAGCTCAGGCGGTAGAGCGCTCGCTTAGCATGCGAGAGGTAGCGGGATCGACGCCCGCATTCTCCA |
| tA(AGC)F10     | Hs_Ala2     | 6           | 26881822       | 26881750     | Ala     | AGC        |        | GGGGAATTGGCTCAAGCGGTAGAGCGCTTGCTTAGCATGCAAGAGGTAGCAGGATCGACGCCTGCACTCTCCA |
| tA(AGC)B       | Hs_Ala2     | 2           | 27185733       | 27185805     | Ala     | AGC        |        | GGGGGATTAGCTCAAATGGTAGAGCGCTCGCTTAGCATGCGAGAGGTAGCGGGATCGATGCCCCGATCCTCCA |
| tA(AGC)F20     | Hs_Ala2     | 6           | 58249908       | 58249836     | Ala     | AGC        |        | GGGGAATTAGCTCAAGCGGTAGAGCGCTCCCTTAGCATGCGAGAGGTAGCGGGATCGACGCCCCATTCTCTA  |
| tA(AGC)F21     | Hs_Ala2     | 6           | 58250620       | 58250548     | Ala     | AGC        |        | GGGGGATTAGCTCAAGCGGTAGAGCGCTGCTTAGCATGCAAGAGGTAGCAGGATCGATGCCTGCATTCTCCA  |
| tA(AGC)H       | Hs_Ala2     | 8           | 67188978       | 67189050     | Ala     | AGC        |        | GGGGGATTAGCTCAAATGGTAGAGCGCTCGCTTAGCATGCGAGAGGTAGCGGGATCGATGCCCCGATCCTCCA |
| tA(AGC)N       | Hs_Ala2     | 14          | 88515195       | 88515267     | Ala     | AGC        |        | GGGGAATTAGCTCAAGTGGTAGAGCGCTCGCTTAGCATGCGAGAGGTAGTGGGATCGATGCCCCGATTCTCCA |
| tA(AGC)F2      | Hs_Ala3     | 6           | 26781569       | 26781641     | Ala     | AGC        |        | GGGGAATTAGCTCAAGTGGTAGAGCGCTTGCTTAGCATGCAAGAGGTAGTGGGATCAATGCCACATTCTCCA  |
| tA(AGC)F3      | Hs_Ala3     | 6           | 26790694       | 26790766     | Ala     | AGC        |        | GGGGAATTAGCTCAAGTGGTAGAGCGCTTGCTTAGCATGCAAGAGGTAGTGGGATCGATGCCACATTCTCCA  |
| tA(AGC)F4      | Hs_Ala3     | 6           | 26795464       | 26795536     | Ala     | AGC        |        | GGGGAATTAGCTCAAGTGGTAGAGCGCTTGCTTAGCACGCAAGAGGTAGTGGGATCGATGCCACATTCTCCA  |
| tA(AGC)F5      | Hs_Ala3     | 6           | 26813585       | 26813657     | Ala     | AGC        |        | GGGGAATTAGCTCAAGCGGTAGAGCGCTTGCTTAGCATGCAAGAGGTAGTGGGATCGATGCCACATTCTCCA  |
| tA(AGC)F11     | Hs_Ala3     | 6           | 26904057       | 26903985     | Ala     | AGC        |        | GGGGAATTAGCTCAAGTGGTAGAGCGCTTGCTTAGCATGCAAGAGGTAGTGGGATCGATGCCACATTCTCCA  |
| tA(AGC)F13     | Hs_Ala3     | 6           | 28734064       | 28733993     | Ala     | AGC        |        | GGGGATGTAGCTCAGTGGTAGAGCGCATGCTTAGCATGCATGAGGTCCCAGGTTTCGATCCCCAGCATCTCCA |
| tA(AGC)F22     | Hs_Ala3     | 6           | 58272659       | 58272587     | Ala     | AGC        |        | GGGGAATTAGCTCAAGCGGTAGAGCGCTTGCTTAGCATGCAAGAGGTAGTGGGATCGATGCCACATTCTCCA  |
| tA(AGC)F23     | Hs_Ala3     | 6           | 58290710       | 58290638     | Ala     | AGC        |        | GGGGAATTAGCTCAAGTGGTAGAGCGCTTGCTTAGCATGCAAGAGGTAGTGGGATCGATGCCACATTCTCCA  |
| tA(AGC)F24     | Hs_Ala3     | 6           | 58295475       | 58295403     | Ala     | AGC        |        | GGGGAATTAGCGCAAGTGGTAGAGTGCTTGCTTAGCATGCAAGAGGTAGTGGGATCGATGCCACATTCTCCA  |

|            |         |          |           |           |     |     |     |                                                                                                |
|------------|---------|----------|-----------|-----------|-----|-----|-----|------------------------------------------------------------------------------------------------|
| tA(AGC)F25 | Hs_Ala3 | 6        | 58304654  | 58304582  | Ala | AGC |     | GGGGAATTAGCCCAAGTGGTAGAGCGCTTGCTTAGCATGCAAGAGGTAGTGGGATCGATGCCACATTCTCCA                       |
| tR(CCG)Q   | Hs_Arg1 | 7_random | 1279261   | 1279333   | Arg | CCG |     | GACCCAGTGGCCTAATGGATAAAGGCATCAGCCTCCGGAGCTGGGGATTGTGGGTTTCGAGTCCCATCTGGGTTCG                   |
| tR(CCG)P   | Hs_Arg1 | 16       | 3140676   | 3140748   | Arg | CCG |     | GGCCGCGTGGCCTAATGGATAAAGGCCTGATTCCGGATCAGAAGATTGAGGGTTCGAGTCCCTTCGTGGTTCG                      |
| tR(CCG)F1  | Hs_Arg1 | 6        | 28818780  | 28818708  | Arg | CCG |     | GGCCGCGTGGCCTAATGGATAAAGGCCTGATTCCGGATCAGAAGATTGAGGGTTCGAGTCCCTTCGTGGTTCG                      |
| tR(CCG)F2  | Hs_Arg1 | 6        | 28957144  | 28957216  | Arg | CCG |     | GGCCGCGTGGCCTAATGGATAAAGGCCTGATTCCGGATCAGAAGATTGAGGGTTCGAGTCCCTTCGTGGTTCG                      |
| tR(TCG)F1  | Hs_Arg1 | 6        | 26407884  | 26407956  | Arg | TCG |     | GACCACGTGGCCTAATGGATAAAGGCCTGACTTCGGATCAGAAGATTGAGGGTTCGAATCCCTTCGTGGTTA                       |
| tR(TCG)F2  | Hs_Arg1 | 6        | 26431025  | 26431097  | Arg | TCG |     | GACCACGTGGCCTAATGGATAAAGGCCTGACTTCGGATCAGAAGATTGAGGGTTCGAATCCCTTCGTGGTTA                       |
| tR(TCG)F3  | Hs_Arg1 | 6        | 28618942  | 28618870  | Arg | TCG |     | GACCACGTGGCCTAATGGATAAAGGCCTGACTTCGGATCAGAAGATTGAGGGTTCGAATCCCTTCGTGGTTG                       |
| tR(TCG)Q   | Hs_Arg1 | 17       | 70542803  | 70542875  | Arg | TCG |     | GACCCGCGTGGCCTAATGGATAAAGGCCTGACTTCGGATCAGAAGATTGAGGGTTCGAGTCCCTTCGTGGTTCG                     |
| tR(TCG)O   | Hs_Arg1 | 15       | 87679308  | 87679380  | Arg | TCG |     | GGCCGCGTGGCCTAATGGATAAAGGCCTGACTTCGGATCAGAAGATTGCAGGTTTCGAGTCCCTTCGTGGTTCG                     |
| tR(TCG)I   | Hs_Arg1 | 9        | 110040358 | 110040430 | Arg | TCG |     | GGCCGCGTGGCCTAATGGATAAAGGCCTGACTTCGGATCAAAAAGATTGCAGGTTTTCGAGTTCCTGCCACGGTTCG                  |
| tQ(TTG)D   | Hs_Arg1 | 4        | 40749743  | 40749671  | Gln | TTG |     | GACCATGTGGCCTAAGGGAAAAGACATCTCACTTTGGGTTCAGAAGATTGAGGGTTCAGTCCCTTCATGGTCA                      |
| tR(ACG)N   | Hs_Arg2 | 14       | 22468750  | 22468822  | Arg | ACG |     | GGGCCAGTGGCGCAATGGATAACGCGTCTGACTACGGATCAGAAGATTCCAGGTTTCGACTCCTGGCTGGCTCG                     |
| tR(ACG)F1  | Hs_Arg2 | 6        | 26436347  | 26436419  | Arg | ACG |     | GGGCCAGTGGCGCAATGGATAACGCGTCTGACTACGGATCAGAAGATTCCAGGTTTCGACTCCTGGCTGGCTCG                     |
| tR(ACG)F2  | Hs_Arg2 | 6        | 26645705  | 26645777  | Arg | ACG |     | GGGCCAGTGGCGCAATGGATAACGCGTCTGACTACGGATCAGAAGATTCCAGGTTTCGACTCCTGGCTGGCTCG                     |
| tR(ACG)F3  | Hs_Arg2 | 6        | 27289674  | 27289602  | Arg | ACG |     | GGGCCAGTGGCGCAATGGATAACGCGTCTGACTACGGATCAGAAGATTCTAGGTTTCGACTCCTGGCTGGCTCG                     |
| tR(ACG)F4  | Hs_Arg2 | 6        | 27290931  | 27291003  | Arg | ACG |     | GGGCCAGTGGCGCAATGGATAACGCGTCTGACTACGGATCAGAAGATTCTAGGTTTCGACTCCTGGCTGGCTCG                     |
| tR(ACG)F5  | Hs_Arg2 | 6        | 27746395  | 27746323  | Arg | ACG |     | GGGCCAGTGGCGCAATGGATAACGCGTCTGACTACGGATCAGAAGATTCTAGGTTTCGACTCCTGGCTGGCTCG                     |
| tR(ACG)C   | Hs_Arg2 | 3        | 45705567  | 45705495  | Arg | ACG |     | GGGCCAGTGGCGCAATGGATAACGCGTCTGACTACGGATCAGAAGATTCTAGGTTTCGACTCCTGGCTGGCTCG                     |
| tR(CCG)Q   | Hs_Arg3 | 17       | 63446547  | 63446475  | Arg | CCG |     | GACCCAGTGGCCTAATGGATAAAGGCATCAGCCTCCGGAGCTGGGGATTGTGGGTTTCGAGTCCCACCTGGGTTG                    |
| tR(CCT)P1  | Hs_Arg3 | 16       | 3142902   | 3142974   | Arg | CCT |     | GCCCCAGTGGCCTAATGGATAAAGGTACTGGCCTCCTAAGCCAGGGATTGTGGGTTTCGAGTCCCACCTGGGTTG                    |
| tR(CCT)P2  | Hs_Arg3 | 16       | 3183919   | 3183991   | Arg | CCT |     | GCCCCAGTGGCCTAATGGATAAAGGTACTGGCCTCCTAAGCCAGGGATTGTGGGTTTCGAGTCCCACCTGGGTTG                    |
| tR(CCT)Q1  | Hs_Arg3 | 17       | 70541596  | 70541668  | Arg | CCT |     | GCCCCAGTGGCCTAATGGATAAAGGCCTGGCCTCCTAAGCCAGGGATTGTGGGTTTCGAGTCCCACCTGGGTTG                     |
| tR(CCT)Q2  | Hs_Arg3 | 17       | 70542193  | 70542121  | Arg | CCT |     | GCCCCAGTGGCCTAATGGATAAAGGCCTGGCCTCCTAAGCCAGGGATTGTGGGTTTCGAGTCCCACCTGGGTTG                     |
| tR(CCT)G   | Hs_Arg3 | 7        | 138482701 | 138482773 | Arg | CCT |     | GCCCCAGTGGCCTAATGGATAAAGGCATTGGCCTCCTAAGCCAGGGATTGTGGGTTTCGAGTCCCACCTGGGTTG                    |
| tR(TCT)Q   | Hs_Arg4 | 17       | 7964968   | 7965055   | Arg | TCT | Yes | GGCTCTGTGGCGCAATGGATAGCGCATTGGACTTCTAGTGACGAATAGAGCAATTCAAAGGTTGTGGGTTTCGAATCCCACCAGAGTTCG     |
| tR(TCT)F   | Hs_Arg4 | 6        | 27637942  | 27638028  | Arg | TCT | Yes | GGCTCTGTGGCGCAATGGATAGCGCATTGGACTTCTAGCCTAAATCAAGAGATTCAAAGGTTGCGGGTTCGAGTCCCTCCAGAGTTCG       |
| tR(TCT)K   | Hs_Arg4 | 11       | 59075343  | 59075428  | Arg | TCT | Yes | GGCTCTGTGGCGCAATGGATAGCGCATTGGACTTCTAGATAGTTAGAGAAATTCAAAGGTTGTGGGTTTCGAGTCCCACCAGAGTTCG       |
| tR(TCT)A1  | Hs_Arg4 | 1        | 94025150  | 94025234  | Arg | TCT | Yes | GGCTCCGTGGCGCAATGGATAGCGCATTGGACTTCTAGAGGCTGAAGGCATTCAAAGGTTCCGGGTTTCGAGTCCCAGGCGGAGTTCG       |
| tR(TCT)I   | Hs_Arg4 | 9        | 128181999 | 128181909 | Arg | TCT | Yes | GGCTCTGTGGCGCAATGGATAGCGCATTGGACTTCTAGCTGAGCCTAGTGTGGTTCATTCAAAGGTTGTGGGTTTCGAGTCCCACCAGAGTTCG |
| tN(GTT)A   | Hs_Asn  | 1_random | 906435    | 906508    | Asn | GTT |     | GTCTCTGTGGCGCAATCGGCTAGCGCGTTTGGCTGTTAACTAAAAGGTTGGCGGTTTCAACCCACCCAGAGGGCG                    |
| tN(GTT)S   | Hs_Asn  | 19       | 1334562   | 1334635   | Asn | GTT |     | GTCTCTGTGGCGCAATCGGTTAGCGCGTTCCGGCTGTTAACCGAAAGGTTGGTGGTTTCGAGCCCACCCAGGGACG                   |
| tN(GTT)A1  | Hs_Asn  | 1        | 16592459  | 16592386  | Asn | GTT |     | GTCTCTGTGGCGCAATCGGTTAGCGCGTTCCGGCTGTTAACTGAAAGGTTGGTGGTTTCGAGCCCACCCAGGGACG                   |
| tN(GTT)A2  | Hs_Asn  | 1        | 16947264  | 16947337  | Asn | GTT |     | GTCTCTGTGGTGAATCGGTTAGCGCGTTCCGGCTGTTAACCATAAGGTTGGTGGTTAGAGACCACCCAGGGACG                     |
| tN(GTT)A3  | Hs_Asn  | 1        | 16961478  | 16961551  | Asn | GTT |     | GTCTCTGTGGCGCAATCGGTTAGCGCGTTCCGGCTGTTAACCGAAAGATTGGTGGTTTCGAGCCCACCCAGGGACG                   |
| tN(GTT)J   | Hs_Asn  | 10       | 22558517  | 22558444  | Asn | GTT |     | GTCTCTGTGGCGCAATCGGTTAGCGCGTTCCGGCTGTTAACCGAAAGGTTGGTGGTTTCGAGCCCACCCAGGGACG                   |
| tN(GTT)M   | Hs_Asn  | 13       | 30146174  | 30146101  | Asn | GTT |     | GTCTCTGTGGCGCAATCGGTTAGCGCGTTCCGGCTGTTAACCGAAAGGTTGGTGGTTTCGAGCCCACCCAGGGACG                   |
| tN(GTT)Q   | Hs_Asn  | 17       | 34161633  | 34161560  | Asn | GTT |     | GTCTCTGTGGCGCAATCGGTTAGCGCGTTCCGGCTGTTAACCGAAAGGTTGGTGGTTTCGAGCCCACCCAGGGACG                   |
| tN(GTT)A4  | Hs_Asn  | 1        | 141878966 | 141879039 | Asn | GTT |     | GTCTCTGTGGTGAATCGGTTAGCGCGTTCCGGCTGTTAACCGAAAGCTTGGTGGTTTCGAGCCCACCCAGGGATG                    |
| tN(GTT)A5  | Hs_Asn  | 1        | 141886042 | 141885969 | Asn | GTT |     | GTCTCTGTGGCGCAATCGGTTAGCGCGTTTACTGTTAACTGAAAGGTTGGTGGTGAAGCCCATCCAGGGATG                       |
| tN(GTT)A6  | Hs_Asn  | 1        | 142059195 | 142059268 | Asn | GTT |     | GTCTCTGTGGTGAATCGGTTAGCGCGTTCCGGCTGTTAACCGAAAGCTTGGTGGTTTTCGAGCCCACCCAGGGATG                   |
| tN(GTT)A7  | Hs_Asn  | 1        | 142066271 | 142066198 | Asn | GTT |     | GTCTCTGTGGCGCAATCGGTTAGCGCGTTTACTGTTAACTGAAAGGTTGGTGGTGAAGCCCATCCAGGGATG                       |
| tN(GTT)A8  | Hs_Asn  | 1        | 143448656 | 143448583 | Asn | GTT |     | GTCTCTGTGGCGCAATCGGTTAGCGCGTTCCGGCTGTTAACTGAAAGGTTAGTGGTTTCGAGCCCACCCAGGGACG                   |
| tN(GTT)A9  | Hs_Asn  | 1        | 144745656 | 144745583 | Asn | GTT |     | GTCTCTGTGGCGCAATCGGTTAGCGCGTTCCGGCTGTTAACTGAAAGGTTAGTGGTTTCGAGCCCACCCAGGGACG                   |
| tN(GTT)A10 | Hs_Asn  | 1        | 144992449 | 144992522 | Asn | GTT |     | GTCTCTGTGGCGCAATCGGTTAGCGCGTTTACTGTTAACTGAAAGGTTGGTGGTGAAGCCCATCCAGGGATG                       |
| tN(GTT)A11 | Hs_Asn  | 1        | 145115717 | 145115790 | Asn | GTT |     | GTCTCTGTGGCGTAGTCGGTTAGCGCGTTCCGGCTGTTAACCGAAAAGTTGGTGGTTTCGAGCCCACCCAGGAACG                   |
| tN(GTT)A12 | Hs_Asn  | 1        | 145377979 | 145377906 | Asn | GTT |     | GTCTCTGTGGCGCAATCGGTTAGCGCATTCCGGCTGTTAACCGAAAGGTTGGTGGTTTCGAGCCCACCCAGGGACG                   |
| tN(GTT)A13 | Hs_Asn  | 1        | 145540021 | 145539948 | Asn | GTT |     | GTCTCTGTGGCGCAATCGGTTAGCGCATTCCGGCTGTTAACCGAAAGGTTGGTGGTTTCGAGCCCACCCAGGGACG                   |
| tN(GTT)A14 | Hs_Asn  | 1        | 146010235 | 146010162 | Asn | GTT |     | GTCTCTGTGGCGCAATGGGTTAGCGCGTTCCGGCTGTTAACCGAAAGGTTGGTGGTTTCGAGCCCATCCAGGGACG                   |



|            |         |    |           |           |     |     |                                                                           |
|------------|---------|----|-----------|-----------|-----|-----|---------------------------------------------------------------------------|
| tC(GCA)G17 | Hs_Cys  | 7  | 148825991 | 148825920 | Cys | GCA | GGGGATATAGCTCAGGGGTAGAGCATTGACTGCAGATCAAGAGGTCCCCGGTTCAAATCCGGGTGCCCCC    |
| tC(GCA)G18 | Hs_Cys  | 7  | 148842408 | 148842479 | Cys | GCA | GGGGGTATAGCTCAGGGGTAGAGCATTGACTGCAGATCAAGAGGTCCCTGGTTCAAATCCAGGTGCCCCCT   |
| tQ(CTG)A1  | Hs_Gln  | 1  | 143432853 | 143432924 | Gln | CTG | GGTTCCATGGTGTAAATGGTGAGCACTCTGGACTCTGAATCCAGCGATCCGAGTTCGAGTCTCGGTGGAACCT |
| tQ(CTG)A2  | Hs_Gln  | 1  | 144729854 | 144729925 | Gln | CTG | GGTTCCATGGTGTAAATGGTGAGCACTCTGGACTCTGAATCCAGCGATCCGAGTTCGAGTCTCGGTGGAACCT |
| tQ(CTG)A3  | Hs_Gln  | 1  | 144852365 | 144852294 | Gln | CTG | GGTTCCATGGTGTAAATGGTAAGCACTCTGGACTCTGAATCCAGCGATCCGAGTTCGAGTCTCGGTGGAACCT |
| tQ(CTG)A4  | Hs_Gln  | 1  | 144915849 | 144915920 | Gln | CTG | GGTTCCATGGTGTAAATGGTAAGCACTCTGGACTCTGAATCCAGCCATCTGAGTTCGAGTCTCTGTGGAACCT |
| tQ(CTG)A5  | Hs_Gln  | 1  | 145965717 | 145965788 | Gln | CTG | GGTTCCATGGTGTAAATGGTAAGCACTCTGGACTCTGAATCCAGCGATCCGAGTTCGAGTCTCGGTGGAACCT |
| tQ(CTG)Q   | Hs_Gln1 | 17 | 7963795   | 7963866   | Gln | CTG | GGTTCCATGGTGTAAATGGTTAGCACTCTGGACTCTGAATCCAGCGATCCGAGTTCAAATCTCGGTGGAACCT |
| tQ(CTG)F1  | Hs_Gln1 | 6  | 18944381  | 18944452  | Gln | CTG | GGTTCCATGGTGTAAATGGTTAGCACTCTGGACTCTGAATCCAGCGATCCGAGTTCAAATCTCGGTGGAACCT |
| tQ(CTG)F2  | Hs_Gln1 | 6  | 27371191  | 27371262  | Gln | CTG | GGTTCCATGGTGTAAATGGTTAGCACTCTGGACTCTGAATCCGTAATCCGAGTTCAAATCTCGGTGGAACCT  |
| tQ(CTG)F3  | Hs_Gln1 | 6  | 27595287  | 27595358  | Gln | CTG | GGTTCCATGGTGTAAATGGTTAGCACTCTGGACTCTGAATCCAGCGATCCGAGTTCAAATCTCGGTGGAACCT |
| tQ(CTG)F4  | Hs_Gln1 | 6  | 27623581  | 27623510  | Gln | CTG | GGTTCCATGGTGTAAATGGTTAGCACTCTGGACTCTGAATCCAGCGATCCGAGTTCAGTCTCGGTGGAACCT  |
| tQ(CTG)F5  | Hs_Gln1 | 6  | 27867185  | 27867114  | Gln | CTG | GGCCCCATGGTGTAAATGGTCAGCACTCTGGACTCTGAATCCAGCGATCCGAGTTCAAATCTCGGTGGGACCC |
| tQ(CTG)F6  | Hs_Gln1 | 6  | 29017428  | 29017357  | Gln | CTG | GGTTCCATGGTGTAAATGGTTAGCACTCTGGACTCTGAATCCAGCGATCCGAGTTCAAATCTCGGTGGAACCT |
| tQ(CTG)O   | Hs_Gln1 | 15 | 63948525  | 63948454  | Gln | CTG | GGTTCCATGGTGTAAATGGTTAGCACTCTGGACTCTGAATCCAGCGATCCGAGTTCAAATCTCGGTGGAACCT |
| tQ(TTG)F1  | Hs_Gln1 | 6  | 26419474  | 26419403  | Gln | TTG | GGCCCCATGGTGTAAATGGTTAGCACTCTGGACTTTGAATCCAGCGATCCGAGTTCAAATCTCGGTGGGACCT |
| tQ(TTG)F2  | Hs_Gln1 | 6  | 26420025  | 26419954  | Gln | TTG | GGCCCCATGGTGTAAATGGTTAGCACTCTGGACTTTGAATCCAGCGATCCGAGTTCAAATCTCGGTGGGACCT |
| tQ(TTG)F3  | Hs_Gln1 | 6  | 27871690  | 27871619  | Gln | TTG | GGCCCCATGGTGTAAATGGTTAGCACTCTGGACTTTGAATCCAGCGATCCGAGTTCAAATCTCGGTGGGACCT |
| tQ(TTG)F4  | Hs_Gln1 | 6  | 28665135  | 28665206  | Gln | TTG | GGTCCCATGGTGTAAATGGTTAGCACTCTGGACTTTGAATCCAGCAATCCGAGTTCGAATCTCGGTGGGACCT |
| tQ(TTG)Q   | Hs_Gln1 | 17 | 44624889  | 44624960  | Gln | TTG | GGTCCCATGGTGTAAATGGTTAGCACTCTGGACTTTGAATCCAGCAATCCGAGTTCGAATCTCGGTGGGACCT |
| tQ(TTG)F5  | Hs_Gln1 | 6  | 145545552 | 145545623 | Gln | TTG | GGTCCCATGGTGTAAATGGTTAGCACTCTGGCTTTGAATCCAGCAATCCGAGTTCGAATCTCGGTGGGACCT  |
| tE(CTC)F1  | Hs_Glu  | 6  | 29057955  | 29058026  | Glu | CTC | TCCCTGGTGGTCTAGTGGTTAGGATTCGGCGCTCTACCGCCGCGGCCGGGTTTCGATTCCCGGTCAGGGAA   |
| tE(CTC)F2  | Hs_Glu  | 6  | 126143157 | 126143086 | Glu | CTC | TCCCTGGTGGTCTAGTGGTTAGGATTCGGCGCTCTACCGCCGCGGCCGGGTTTCGATTCCCGGTCAGGGAA   |
| tE(CTC)A2  | Hs_Glu  | 1  | 158230144 | 158230073 | Glu | CTC | TCCCTGGTGGTCTAGTGGTTAGGATTCGGCGCTCTACCGCCGCGGCCGGGTTTCGATTCCCGGTCAGGGAA   |
| tE(CTC)A3  | Hs_Glu  | 1  | 158237524 | 158237453 | Glu | CTC | TCCCTGGTGGTCTAGTGGTTAGGATTCGGCGCTCTACCGCCGCGGCCGGGTTTCGATTCCCGGTCAGGGAA   |
| tE(TTC)A2  | Hs_Glu  | 1  | 16944384  | 16944455  | Glu | TTC | TCCCTGGTGGTCTAGTGGCTAGGATTCGGCGCTTTACCGCCGCGGCCGGGTTTCGATTCCCGGCCAGGGAA   |
| tE(TTC)O   | Hs_Glu  | 15 | 23878545  | 23878474  | Glu | TTC | TCCCACATGGTCTAGCGGTTAGGATTCCTGGTTTTACCCAGGCGGCCCGGGTTCGACTCCCGGTGTGGGAA   |
| tE(TTC)M1  | Hs_Glu  | 13 | 40532945  | 40532874  | Glu | TTC | TCCCACATGGTCTAGCGGTTAGGATTCCTGGTTTTACCCAGGCGGCCCGGGTTCGACTCCCGGTGTGGGAA   |
| tE(TTC)M2  | Hs_Glu  | 13 | 44390133  | 44390062  | Glu | TTC | TCCCACATGGTCTAGCGGTTAGGATTCCTGGTTTTACCCAGGCGGCCCGGGTTCGACTCCCGGTGTGGGAA   |
| tE(TTC)B   | Hs_Glu  | 2  | 130811002 | 130810931 | Glu | TTC | TCCCACATGGTCTAGCGGTTAGGATTCCTGGTTTTACCCAGGCGGCCCGGGTTCGACTCCCGGTGTGGGAA   |
| tE(CTC)A1  | Hs_Glu1 | 1  | 142888348 | 142888277 | Glu | CTC | TCCCTGGTGGTCTAGTGGTTAGGATTCGGCGCTCTACCGCCGCGGCCGGGTTTCGATTCCCGGTCAGGGAA   |
| tE(CTC)A4  | Hs_Glu1 | 1  | 158244935 | 158244864 | Glu | CTC | TCCCTGGTGGTCTAGTGGTTAGGATTCGGCGCTCTACCGCCGCGGCCGGGTTTCGATTCCCGGTCAGGGAA   |
| tE(CTC)A5  | Hs_Glu1 | 1  | 158252315 | 158252244 | Glu | CTC | TCCCTGGTGGTCTAGTGGTTAGGATTCGGCGCTCTACCGCCGCGGCCGGGTTTCGATTCCCGGTCAGGGAA   |
| tE(CTC)A6  | Hs_Glu1 | 1  | 245378198 | 245378269 | Glu | CTC | TCCCTGGTGGTCTAGTGGTTAGGATTCGGCGCTCTACCGCCGCGGCCGGGTTTCGATTCCCGGTCAGGAAA   |
| tE(TTC)A1  | Hs_Glu1 | 1  | 16607151  | 16607080  | Glu | TTC | TCCCTGGTGGTCTAGTGGCTAGGATTCGGCGCTTTACCGCCGCGGCCGGGTTTCGATTCCCGGTCAGGGAA   |
| tE(TTC)A3  | Hs_Glu1 | 1  | 146477500 | 146477428 | Glu | TTC | TCCCTGGTGGTCTAGTGGCTAGGATTCGGCGCTTTACCGCCTGCAGCTCGAGTTCGATTCTCGGTTCAGGGAA |
| tE(TTC)A4  | Hs_Glu1 | 1  | 158205027 | 158204956 | Glu | TTC | TCCCTGGTGGTCTAGTGGCTAGGATTCGGCGCTTTACCGCCGCGGCCGGGTTTCGATTCCCGGTCAGGGAA   |
| tG(CCC)A1  | Hs_Gly1 | 1  | 16617810  | 16617740  | Gly | CCC | GCATTGGTGGTTTCAGTGGTAGAATTCTCGCCTCCCACGCGGGAGACCCGGGTTCAATCCCGGCCAATGCA   |
| tG(CCC)A2  | Hs_Gly1 | 1  | 16750142  | 16750072  | Gly | CCC | GCGTTGGTGGTTTTCAGTGGTAGAATTCTCGCCTCCCACGCGGGAGACCCGGGTTCAATCCCGGCCACTGCA  |
| tG(CCC)A3  | Hs_Gly1 | 1  | 16799086  | 16799156  | Gly | CCC | GCATTGGTGGTTCAGTGGTAGAATTCTCGCCTCCCACGCGGGAGACCCGGGTTCAATCCCGGCCAATGCA    |
| tG(CCC)A4  | Hs_Gly1 | 1  | 16933722  | 16933792  | Gly | CCC | GCATTGGTGGTTCAGTGGTAGAATTCTCGCCTCCCACGCGGGAGACCCGGGTTCAATCCCGGCCAATGCA    |
| tG(CCC)Q   | Hs_Gly1 | 17 | 19704767  | 19704837  | Gly | CCC | GCATTGGTGGTTCAGTGGTAGAATTCTCGCCTCCCACGCGGGAGGACCCAGGTTTCGATTCTCGGCCAATGCA |
| tG(GCC)Q   | Hs_Gly1 | 17 | 7969789   | 7969859   | Gly | GCC | GCATTGGTGGTTCAGTGGTAGAATTCTCGCCTGCCACGCGGGAGGCCCGGGTTTCGATTCCCGGCCAATGCA  |
| tG(GCC)U   | Hs_Gly1 | 21 | 17749048  | 17748978  | Gly | GCC | GCATGGGTGGTTCAGTGGTAGAATTCTCGCCTGCCACGCGGGAGGCCCGGGTTTCGATTCCCGGCCATGCA   |
| tG(GCC)F   | Hs_Gly1 | 6  | 27978735  | 27978665  | Gly | GCC | GCATTGGTGGTTCAGTGGTAGAATTCTCGCCTGCCACGCGGGAGGCCCGGGTTTCGATTCCCGGCCAATGCA  |
| tG(GCC)P1  | Hs_Gly1 | 16 | 69369685  | 69369615  | Gly | GCC | GCATTGGTGGTTCAGTGGTAGAATTCTCGCCTGCCACGCGGGAGGCCCGGGTTTCGATTCCCGGCCAGTGA   |
| tG(GCC)P2  | Hs_Gly1 | 16 | 69370513  | 69370443  | Gly | GCC | GCATTGGTGGTTCAGTGGTAGAATTCTCGCCTGCCACGCGGGAGGCCCGGGTTTCGATTCCCGGCCAATGCA  |
| tG(GCC)P3  | Hs_Gly1 | 16 | 69380098  | 69380168  | Gly | GCC | GCATTGGTGGTTCAGTGGTAGAATTCTCGCCTGCCATGCGGGCGGCCGGGTTTCGATTCTGGCCAATGCA    |
| tG(GCC)P4  | Hs_Gly1 | 16 | 69380911  | 69380981  | Gly | GCC | GCATTGGTGGTTCAGTGGTAGAATTCTCGCCTGCCACGCGGGAGGCCCGGGTTTCGATTCCCGGCCAATGCA  |

|            |         |          |           |           |     |     |     |                                                                                                  |
|------------|---------|----------|-----------|-----------|-----|-----|-----|--------------------------------------------------------------------------------------------------|
| tG(GCC)B   | Hs_Gly1 | 2        | 157083237 | 157083167 | Gly | GCC |     | GCATTGGTGGTTCAGTGGTAGAATTCTCGCCTGCCACGCGGGAGGCCCGGGTTCGATTCCCGGCCAATGCA                          |
| tG(GCC)A1  | Hs_Gly1 | 1        | 158226167 | 158226237 | Gly | GCC |     | GCATGGGTGGTTCAGTGGTAGAATTCTCGCCTGCCACGCGGGAGGCCCGGGTTCGATTCCCGGCCAATGCA                          |
| tG(GCC)A2  | Hs_Gly1 | 1        | 158233522 | 158233592 | Gly | GCC |     | GCATGGGTGGTTCAGTGGTAGAATTCTCGCCTGCCACGCGGGAGGCCCGGGTTCGATTCCCGGCCAATGCA                          |
| tG(GCC)A3  | Hs_Gly1 | 1        | 158240953 | 158241023 | Gly | GCC |     | GCATGGGTGGTTCAGTGGTAGAATTCTCGCCTGCCACGCGGGAGGCCCGGGTTCGATTCCCGGCCAATGCA                          |
| tG(GCC)A4  | Hs_Gly1 | 1        | 158248313 | 158248383 | Gly | GCC |     | GCATGGGTGGTTCAGTGGTAGAATTCTCGCCTGCCACGCGGGAGGCCCGGGTTCGATTCCCGGCCAATGCA                          |
| tG(GCC)A5  | Hs_Gly1 | 1        | 158263411 | 158263481 | Gly | GCC |     | GCATAGGTGGTTCAGTGGTAGAATTCTTGCCTGCCACGCGAGGAGGCCAGGTTTGATTCTGGCCCATGCA                           |
| tG(GCC)A6  | Hs_Gly1 | 1        | 158306762 | 158306692 | Gly | GCC |     | GCATTGGTGGTTCAGTGGTAGAATTCTCGCCTGCCACGCGGGAGGCCCGGGTTCGATTCCCGGCCAATGCA                          |
| tG(TCC)S   | Hs_Gly2 | 19       | 4675082   | 4675153   | Gly | TCC |     | GCGTTGGTGGTATAGTGGTAGCATAGCTGCCTTCCAAGCAGTTGACCCGGGTTTCGATTCCCGGCCAACGCA                         |
| tG(TCC)Q   | Hs_Gly2 | 17       | 8065591   | 8065662   | Gly | TCC |     | GCGTTGGTGGTATAGTGGTAAGCATAGCTGCCTTCCAAGCAGTTGACCCGGGTTTCGATTCCCGGCCAACGCA                        |
| tG(TCC)A1  | Hs_Gly2 | 1        | 142886979 | 142886908 | Gly | TCC |     | GCGTTGGTGGTATAGTGGTGAGCATAGCTGCCTTCCAAGCAGTTGACCCGGGTTTCGATTCCCGGCCAACGCA                        |
| tG(TCC)A2  | Hs_Gly2 | 1        | 158223105 | 158223034 | Gly | TCC |     | GCGTTGGTGGTATAGTGGTGAGCATAGTTGCCTTCCAAGCAGTTGACCCGGGTTTCGATTCCCGGCCAACGCA                        |
| tG(TCC)A3  | Hs_Gly2 | 1        | 158230501 | 158230430 | Gly | TCC |     | GCGTTGGTGGTATAGTGGTGAGCATAGCTGCCTTCCAAGCAGTTGACCCGGGTTTCGATTCCCGGCCAACGCA                        |
| tG(TCC)A4  | Hs_Gly2 | 1        | 158237882 | 158237811 | Gly | TCC |     | GCGTTGGTGGTATAGTGGTGAGCATAGCTGCCTTCCAAGCAGTTGACCCGGGTTTCGATTCCCGGCCAACGCA                        |
| tG(TCC)A5  | Hs_Gly2 | 1        | 158245292 | 158245221 | Gly | TCC |     | GCGTTGGTGGTATAGTGGTGAGCATAGCTGCCTTCCAAGCAGTTGACCCGGGTTTCGATTCCCGGCCAACGCA                        |
| tG(TCC)A6  | Hs_Gly2 | 1        | 158252673 | 158252602 | Gly | TCC |     | GCGTTGGTGGTATAGTGGTGAGCATAGCTGCCTTCCAAGCAGTTGACCCGGGTTTCGATTCCCGGCCAACGCA                        |
| tG(TCC)A7  | Hs_Gly2 | 1        | 158313958 | 158314029 | Gly | TCC |     | GCGTTGGTGGTATAGTGGTGAGCATAGCTGCCTTCCAAGCAGTTGACCCGGGTTTCGATTCCCGGCCAACGCA                        |
| tG(CCC)P   | Hs_Gly3 | 16       | 626807    | 626737    | Gly | CCC |     | GCGCCGCTGGTGTAGTGGTATCATGCAAGATTCCCATTCTTGCAGCCCGGGTTCGATTCCCGGGCGGCGCA                          |
| tG(CCC)B   | Hs_Gly3 | 2        | 70387844  | 70387774  | Gly | CCC |     | GCGCCGCTGGTGTAGTGGTATCATGCAAGATTCCCATTCTTGCAGCCCGGGTTCGATTCCCGGGCGGCGCA                          |
| tH(GTG)I   | Hs_His  | 9        | 14424009  | 14423938  | His | GTG |     | GCCGTGATCGTATAGTGGTTAGTACTCTGCGTTGTGGCCGAGCAACCTCGGTTTCAATCCGAGTCACGGCA                          |
| tH(GTG)F   | Hs_His  | 6        | 27233885  | 27233956  | His | GTG |     | GCCGTGATCGTATAGTGGTTAGTACTCTGCGTTGTGGCCGAGCAACCTCGGTTTCAATCCGAGTCACGGCA                          |
| tH(GTG)O1  | Hs_His  | 15       | 43278167  | 43278096  | His | GTG |     | GCCGTGATCGTATAGTGGTTAGTACTCTGCGTTGTGGCCGAGCAACCTCGGTTTCAATCCGAGTCACGGCA                          |
| tH(GTG)O2  | Hs_His  | 15       | 43279974  | 43279903  | His | GTG |     | GCCGTGATCGTATAGTGGTTAGTACTCTGCGTTGTGGCCGAGCAACCTCGGTTTCAATCCGAGTCACGGCA                          |
| tH(GTG)O3  | Hs_His  | 15       | 43280641  | 43280712  | His | GTG |     | GCCGTGATCGTATAGTGGTTAGTACTCTGCGTTGTGGCCGAGCAACCTCGGTTTCAATCCGAGTCACGGCA                          |
| tH(GTG)A1  | Hs_His  | 1        | 142885996 | 142885925 | His | GTG |     | GCCGTGATCGTATAGTGGTTAGTACTCTGCGTTGTGGCCGAGCAACCTCGGTTTCAATCCGAGTCACGGCA                          |
| tH(GTG)A2  | Hs_His  | 1        | 143769589 | 143769660 | His | GTG |     | GCCGTGATCGTATAGTGGTTAGTACTCTGCGTTGTGGCCGAGCAACCTCGGTTTCAATCCGAGTCACGGCA                          |
| tH(GTG)A3  | Hs_His  | 1        | 144868383 | 144868454 | His | GTG |     | GCCGTGATCGTATAGTGGTTAGTACTCTGCGTTGTGGCCGAGCAACCTCGGTTTCAATCCGAGTCACGGCA                          |
| tH(GTG)A4  | Hs_His  | 1        | 144889828 | 144889757 | His | GTG |     | GCCGTGATCGTATAGTGGTTAGTACTCTGCGTTGTGGCCGAGCAACCTCGGTTTCAATCCGAGTCACGGCA                          |
| tH(GTG)A5  | Hs_His  | 1        | 145935491 | 145935420 | His | GTG |     | GCCATGATCGTATAGTGGTTAGTACTCTGCGCTGTGGCCGAGCAACCTCGGTTTCAATCCGAGTCACGGCA                          |
| tI(AAT)Q1  | Hs_Ile1 | 17       | 8031636   | 8031709   | Ile | AAT |     | GGCCGGTTAGCTCAGTTGGTTAGAGCGTGGTGCTAATAACGCCAAGGTCGCGGGTTCGATCCCCGTACGGGCCA                       |
| tI(AAT)Q2  | Hs_Ile1 | 17       | 8071107   | 8071034   | Ile | AAT |     | GGCCGGTTAGCTCAGTTGGTTAGAGCGTGGTGCTAATAACGCCAAGGTCGCGGGTTCGATCCCCGTACGGGCCA                       |
| tI(AAT)F1  | Hs_Ile1 | 6        | 26662329  | 26662402  | Ile | AAT |     | GGCCGGTTAGCTCAGTTGGTTAGAGCGTGGTGCTAATAACGCCAAGGTCGCGGGTTCGATCCCCGTACGGGCCA                       |
| tI(AAT)F2  | Hs_Ile1 | 6        | 26829273  | 26829200  | Ile | AAT |     | GGCCGGTTAGCTCAGTTGGTTAGAGCGTGGTGCTAATAACGCCAAGGTCGCGGGTTCGATCCCCGTACGGGCCA                       |
| tI(AAT)F3  | Hs_Ile1 | 6        | 26853307  | 26853234  | Ile | AAT |     | GGCCGGTTAGCTCAGTTGGTTAGAGCGTGGTGCTAATAACGCTAAGGTCGCGGGTTCGATCCCCGTACTGGCCA                       |
| tI(AAT)F4  | Hs_Ile1 | 6        | 26888811  | 26888884  | Ile | AAT |     | GGCCGGTTAGCTCAGTTGGTTAGAGCGTGGTGCTAATAACGCCAAGGTCGCGGGTTCGATCCCCGTACTGGCCA                       |
| tI(AAT)F5  | Hs_Ile1 | 6        | 27253046  | 27252973  | Ile | AAT |     | GGCCGGTTAGCTCAGTTGGTTAGAGCGTGGTGCTAATAACGCCAAGGTCGCGGGTTCGATCCCCGTACTGGCCA                       |
| tI(AAT)F6  | Hs_Ile1 | 6        | 27313402  | 27313329  | Ile | AAT |     | GGCCGGTTAGCTCAGTTGGTTAGAGCGTGGTGCTAATAACGCCAAGGTCGCGGGTTCGATCCCCGTACTGGCCA                       |
| tI(AAT)F7  | Hs_Ile1 | 6        | 27349718  | 27349791  | Ile | AAT |     | GGCTGGTTAGTTAGTTGGTTAGAGCGTGGTGCTAATAACGCCAAGGTCGTGGGTTTCGATCCCCATATCGGCCA                       |
| tI(AAT)F8  | Hs_Ile1 | 6        | 27351042  | 27350969  | Ile | AAT |     | GGCTGGTTAGTTAGTTGGTTAGAGCGTGGTGCTAATAACGCCAAGGTCGCGGGTTCGATCCCCGTACTGGCCA                        |
| tI(AAT)F9  | Hs_Ile1 | 6        | 27744341  | 27744414  | Ile | AAT |     | GGCCGGTTAGCTCAGTCGGCTAGAGCGTGGTGCTAATAACGCCAAGGTCGCGGGTTCGATCCCCGTACTGGCCA                       |
| tI(AAT)F10 | Hs_Ile1 | 6        | 27763946  | 27764019  | Ile | AAT |     | GGCCGGTTAGCTCAGTTGGTTAGAGCGTGGTGCTAATAACGCCAAGGTCGCGGGTTCGATCCCCGTACTGGCCA                       |
| tI(AAT)F11 | Hs_Ile1 | 6        | 58257213  | 58257286  | Ile | AAT |     | GGCCGGTTAGCTCAGTTGGTTAGAGCGTGGTGCTAATAACGCCAAGGTCGCGGGTTCGATCCCCGTACTGGCCA                       |
| tI(AAT)N   | Hs_Ile1 | 14       | 101853182 | 101853255 | Ile | AAT |     | GGCCGGTTAGCTCAGTTGGTTAGAGCGTGGTGCTAATAACGCCAAGGTCGCGGGTTCGATCCCCGTACTGGCCA                       |
| tI(GAT)X1  | Hs_Ile1 | X_random | 86496     | 86423     | Ile | GAT |     | GGCCGGTTAGCTCAGTTGGTTAAGAGCGTGGTGCTAATAACGCCAAGGTCGCGGGTTCGACTCCCGCACC GGCCA                     |
| tI(GAT)X2  | Hs_Ile1 | X_random | 118398    | 118471    | Ile | GAT |     | GGCCGGTTAGCTCAGTTGGTTAAGAGCGTGGTGCTAATAACGCCAAGGTCGCGGGTTCGACTCCCGCACC GGCCA                     |
| tI(GAT)X3  | Hs_Ile1 | X_random | 399021    | 398948    | Ile | GAT |     | GGCCGGTTAGCTCAGTTGGTTAAGAGCGTGGTGCTGATAACACCAAGGTCGCGGGTTCGACTCCCGCACC GGCCA                     |
| tI(GAT)X4  | Hs_Ile1 | X_random | 406943    | 407016    | Ile | GAT |     | GGCCGGTTAGCTCAGTTGGTTAAGAGCGTGGTGCTGATAACACCAAGGTCGCGGGTTCGACTCCCGCACC GGCCA                     |
| tI(GAT)X5  | Hs_Ile1 | X_random | 465544    | 465617    | Ile | GAT |     | GGCCGGTTAGCTCAGTTGGTTAAGAGCGTGGTGCTGATAACACCAAGGTCGCGGGTTCGACTCCCGCACC GGCCA                     |
| tI(TAT)F1  | Hs_Ile2 | 6        | 27096104  | 27096197  | Ile | TAT | Yes | GCTCCAGTGGCGCAATCGGTTAGCGCGCGGTTACTTATATGGCAGTATGTGTGCGAGTGATGCCGAGGTTGTGAGTTTCGAGCCTCACCTGGAGCA |
| tI(TAT)F2  | Hs_Ile2 | 6        | 27707179  | 27707272  | Ile | TAT | Yes | GCTCCAGTGGCGCAATCGGTTAGCGCGCGGTTACTTATACAACAGTATATGTGCGGGTGATGCCGAGGTTGTGAGTTTCGAGCCTCACCTGGAGCA |

|            |         |    |           |           |     |     |     |                                                                                                             |
|------------|---------|----|-----------|-----------|-----|-----|-----|-------------------------------------------------------------------------------------------------------------|
| tI(TAT)F3  | Hs_Ile2 | 6  | 28613346  | 28613439  | Ile | TAT | Yes | GCTCCAGTGGCGCAATCGGTTAGCGCGCGGTTACTTATAAGACAGTGCACCTGTGAGCAATGCCGAGGTTGTGAGTTCAAGCCTCACCTGGAGCA             |
| tI(TAT)B   | Hs_Ile2 | 2  | 42949327  | 42949419  | Ile | TAT | Yes | GCTCCAGTGGCGCAATCGGTTAGCGCGCGGTTACTTATACAGCAGTACATGCAGAGCAATGCCGAGGTTGTGAGTTGAGCCTCACCTGGAGCA               |
| tI(TAT)S   | Hs_Ile2 | 19 | 44594740  | 44594648  | Ile | TAT | Yes | GCTCCAGTGGCGCAATCGGTTAGCGCGCGGTTACTTATATGACAGTGCAGCGGAGCAATGCCGAGGTTGTGAGTTGATCCTCACCTGGAGCA                |
| tL(AAG)N   | Hs_Leu1 | 14 | 20148131  | 20148212  | Leu | AAG |     | GGTAGCGTGGCCGAGCGGTCTAAGGCGCTGGATTAAGGCTCCAGTCTCTTCGGGGGCGTGGGTTCAATCCCACCGCTGCCA                           |
| tL(AAG)P   | Hs_Leu1 | 16 | 22215962  | 22216043  | Leu | AAG |     | GGTAGCGTGGCCGAGCGGTCTAAGGCGCTGGATTAAGGCTCCAGTCTCTTCGGGGGCGTGGGTTCAATCCCACCGCTGCCA                           |
| tL(AAG)F1  | Hs_Leu1 | 6  | 28554460  | 28554379  | Leu | AAG |     | GGTAGCGTGGCCGAGTGGTCTAAGACGCTGGATTAAGGCTCCAGTCTCTTCGGGGGCGTGGGTTTGAATCCCACCGCTGCCA                          |
| tL(AAG)F2  | Hs_Leu1 | 6  | 29019459  | 29019378  | Leu | AAG |     | GGTAGCGTGGCCGAGCGGTCTAAGGCGCTGGATTAAGGCTCCAGTCTCTTCGGGGGCGTGGGTTCAATCCCACCGCTGCCA                           |
| tL(AAG)F3  | Hs_Leu1 | 6  | 29064758  | 29064839  | Leu | AAG |     | GGTAGCGTGGCCGAGCGGTCTAAGGCGCTGGATTAAGGCTCCAGTCTCTTCGGGGGCGTGGGTTCAAATCCCACCGCTGCCA                          |
| tL(AAG)E1  | Hs_Leu1 | 5  | 180457161 | 180457080 | Leu | AAG |     | GGTAGCGTGGCCGAGCGGTCTAAGGCGCTGGATTAAGGCTCCAGTCTCTTCGGAGGCGTGGGTTCAATCCCACCGCTGCCA                           |
| tL(AAG)E2  | Hs_Leu1 | 5  | 180461446 | 180461527 | Leu | AAG |     | GGTAGCGTGGCCGAGCGGTCTAAGGCGCTGGATTAAGGCTCCAGTCTCTTCGGAGGCGTGGGTTCAATCCCACCGCTGCCA                           |
| tL(AAG)E3  | Hs_Leu1 | 5  | 180533731 | 180533650 | Leu | AAG |     | GGTAGCGTGGCCGAGCGGTCTAAGGCGCTGGATTAAGGCTCCAGTCTCTTCGGAGGCGTGGGTTCAATCCCACCGCTGCCA                           |
| tL(AAG)E4  | Hs_Leu1 | 5  | 180547307 | 180547388 | Leu | AAG |     | GGTAGCGTGGCCGAGCGGTCTAAGGCGCTGGATTAAGGCTCCAGTCTCTTCGGGGGCGTGGGTTCAATCCCACCGCTGCCA                           |
| tL(TAG)Q   | Hs_Leu1 | 17 | 7964438   | 7964357   | Leu | TAG |     | GGTAGCGTGGCCGAGCGGTCTAAGGCGCTGGATTTAGGCTCCAGTCTCTTCGGAGGCGTGGGTTCAATCCCACCGCTGCCA                           |
| tL(TAG)N   | Hs_Leu1 | 14 | 20163369  | 20163450  | Leu | TAG |     | GGTAGTGTGGCCGAGCGGTCTAAGGCGCTGGATTTAGGCTCCAGTCTCTTCGGGGGCGTGGGTTCAATCCCACCACTGCCA                           |
| tL(TAG)P   | Hs_Leu1 | 16 | 22114614  | 22114533  | Leu | TAG |     | GGTAGCGTGGCCGAGTGGTCTAAGGCGCTGGATTTAGGCTCCAGTCATTCGATGGCGTGGGTTCAATCCCACCGCTGCCA                            |
| tL(CAA)F1  | Hs_Leu2 | 6  | 27678433  | 27678327  | Leu | CAA | Yes | GTCAGGATGGCCGAGTGGTCTAAGGCGCCAGACTCAAGTTGCTACTTCCCAGGTTTGGGGCTTCTGGTCTCCGCATGGAGGCGTGGGTTCAATCCCACCTTCTGACA |
| tL(CAA)F2  | Hs_Leu2 | 6  | 27681503  | 27681396  | Leu | CAA | Yes | GTCAGGATGGCCGAGTGGTCTAAGGCGCCAGACTCAAGCTTACTGCTTCTGTTCGGGTTCTTGGTCTCCGATGGAGGCGTGGGTTCAATCCCACCTTCTGACA     |
| tL(CAA)F3  | Hs_Leu2 | 6  | 28972084  | 28971979  | Leu | CAA | Yes | GTCAGGATGGCCGAGTGGTCTAAGGCGCCAGACTCAAGCTAAGCTTCTCCGCGGTGGGGATTCTGGTCTCCAATGGAGGCGTGGGTTCAATCCCACCTTCTGACA   |
| tL(CAA)F4  | Hs_Leu2 | 6  | 29016809  | 29016913  | Leu | CAA | Yes | GTCAGGATGGCCGAGTGGTCTAAGGCGCCAGACTCAAGCTTGGCTTCTCGTGTGAGGATTCTGGTCTCCAATGGAGGCGTGGGTTCAATCCCACCTTCTGACA     |
| tL(CAA)A   | Hs_Leu2 | 1  | 245377805 | 245377910 | Leu | CAA | Yes | GTCAGGATGGCCGAGTGGTCTAAGGCGCCAGACTCAAGGTAAGCACCTTCCCTGCGGGCTTCTGGTCTCCGATGGAGGCGTGGGTTCAATCCCACCTTCTGACA    |
| tL(CAG)F   | Hs_Leu2 | 6  | 26629415  | 26629497  | Leu | CAG |     | GTCAGGATGGCCGAGCGGTCTAAGGCGCTGCGTTCCAGTTCAGGTCGAGTCTCCCCTGGAGGCGTGGGTTCAATCCCACCTTCTGACA                    |
| tL(CAG)P1  | Hs_Leu2 | 16 | 55891364  | 55891446  | Leu | CAG |     | GTCAGGATGGCCGAGCGGTCTAAGGCGCTGCGTTCCAGTTCAGGTCGAGTCTCCCCTGGAGGCGTGGGTTCAATCCCACCTTCTGACA                    |
| tL(CAG)P2  | Hs_Leu2 | 16 | 55891975  | 55891893  | Leu | CAG |     | GTCAGGATGGCCGAGCGGTCTAAGGCGCTGCGTTCCAGTTCAGGTCGAGTCTCCCCTGGAGGCGTGGGTTCAATCCCACCTTCTGACA                    |
| tL(CAG)A1  | Hs_Leu2 | 1  | 158224396 | 158224478 | Leu | CAG |     | GTCAGGATGGCCGAGCGGTCTAAGGCGCTGCGTTCCAGTTCAGGTCGAGTCTCCCCTGGAGGCGTGGGTTCAATCCCACCTTCTGACA                    |
| tL(CAG)A2  | Hs_Leu2 | 1  | 158231796 | 158231878 | Leu | CAG |     | GTCAGGATGGCCGAGCGGTCTAAGGCGCTGCGTTCCAGTTCAGGTCGAGTCTCCCCTGGAGGCGTGGGTTCAATCCCACCTTCTGACA                    |
| tL(CAG)A3  | Hs_Leu2 | 1  | 158239177 | 158239259 | Leu | CAG |     | GTCAGGATGGCCGAGCGGTCTAAGGCGCTGCGTTCCAGTTCAGGTCGAGTCTCCCCTGGAGGCGTGGGTTCAATCCCACCTTCTGACA                    |
| tL(CAG)A4  | Hs_Leu2 | 1  | 158246587 | 158246669 | Leu | CAG |     | GTCAGGATGGCCGAGCGGTCTAAGGCGCTGCGTTCCAGTTCAGGTCGAGTCTCCCCTGGAGGCGTGGGTTCAATCCCACCTTCTGACA                    |
| tL(CAG)A5  | Hs_Leu2 | 1  | 158253968 | 158254050 | Leu | CAG |     | GTCAGGATGGCCGAGCGGTCTAAGGCGCTGCGTTCCAGTTCAGGTCGAGTCTCCCCTGGAGGCGTGGGTTCAATCCCACCTTCTGACA                    |
| tL(CAG)A6  | Hs_Leu2 | 1  | 158313269 | 158313187 | Leu | CAG |     | GTCAGGATGGCCGAGCGGTCTAAGGCGCTGCGTTCCAGTTCAGGTCGAGTCTCCCCTGGAGGCGTGGGTTCAATCCCACCTTCTGACA                    |
| tL(TAA)F1  | Hs_Leu3 | 6  | 27306395  | 27306313  | Leu | TAA |     | ACCGGGATGGCTGAGTGGTTAAGGCGTTGGACTTAAGATCCAATGGACAGGTGTCCGCGTGGGTTGAGCCCCACTCCCGGTA                          |
| tL(TAA)F2  | Hs_Leu3 | 6  | 27796959  | 27796877  | Leu | TAA |     | ACCGGGATGGCCGAGTGGTTAAGGCGTTGGACTTAAGATCCAATGGGCTGGTGCCCGCTGGGTTCAACCCCACTCTCGGTA                           |
| tL(TAA)K   | Hs_Leu3 | 11 | 59075804  | 59075886  | Leu | TAA |     | ACCAGAATGGCCGAGTGGTTAAGGCGTTGGACTTAAGATCCAATGGATTTCATATCCGCGTGGGTTCAACCCCACTTCTGGTA                         |
| tL(TAA)F3  | Hs_Leu3 | 6  | 144579377 | 144579459 | Leu | TAA |     | ACCAGGATGGCCGAGTGGTTAAGGCGTTGGACTTAAGATCCAATGGACATATGTCCGCGTGGGTTCAACCCCACTCTCGGTA                          |
| tK(CTT)P1  | Hs_Lys1 | 16 | 3147479   | 3147407   | Lys | CTT |     | GCCCGGCTAGCTCAGTCGGTAGAGCATGAGACCCTTAATCTCAGGGTTCGTGGGTTGAGCCCCACGTTGGGCG                                   |
| tK(CTT)P2  | Hs_Lys1 | 16 | 3165693   | 3165765   | Lys | CTT |     | GCCCGGCTAGCTCAGTCGGTAGAGCATGAGACTCTTAATCTCAGGGTTCGTGGGTTGAGCCCCACGTTGGGCG                                   |
| tK(CTT)P3  | Hs_Lys1 | 16 | 3170628   | 3170556   | Lys | CTT |     | GCCCGGCTAGCTCAGTCGATAGAGCATGAGACTCTTAATCTCAGGGTTCGTGGGTTGAGCCCCACGTTGGGCG                                   |
| tK(CTT)P4  | Hs_Lys1 | 16 | 3181502   | 3181574   | Lys | CTT |     | GCCCGGCTAGCTCAGTCGGTAGAGCATGGGACTCTTAATCTCAGGGTTCGTGGGTTGAGCCCCACGTTGGGCG                                   |
| tK(CTT)F   | Hs_Lys1 | 6  | 26664753  | 26664825  | Lys | CTT |     | GCCCGGCTAGCTCAGTCGGTAGAGCATGAGACTCTTAATCTCAGGGTTCGTGGGTTGAGCCCCACGTTGGGCG                                   |
| tK(CTT)R   | Hs_Lys1 | 18 | 41923341  | 41923269  | Lys | CTT |     | GACGAGCTAGCTCAGTCGGTAGAGCATGGGACTCTTAATCCCAGGGTTCGTGGGTTGAGCCCCATGTTGGGCA                                   |
| tK(CTT)A1  | Hs_Lys1 | 1  | 55135635  | 55135563  | Lys | CTT |     | GCCAGCTAGCTCAGTCGGTAGAGCATGAGACTCTTAATCTCAGGGTTCATGGGTTTGAACCCACGTTGGTG                                     |
| tK(CTT)N   | Hs_Lys1 | 14 | 57776438  | 57776366  | Lys | CTT |     | GCCCGGCTAGCTCAGTCGGTAGAGCATGGGACTCTTAATCCCAGGGTTCGTGGGTTGAGCCCCACGTTGGGCG                                   |
| tK(CTT)O   | Hs_Lys1 | 15 | 76939959  | 76940031  | Lys | CTT |     | GCCCGGCTAGCTCAGTCGGTAGAGCATGGGACTCTTAATCCCAGGGTTCGTGGGTTGAGCCCCACGTTGGGCG                                   |
| tK(CTT)A2  | Hs_Lys1 | 1  | 142884638 | 142884566 | Lys | CTT |     | GCCCGGCTAGCTCAGTCGGTAGAGCATGAGACTCTTAATCTCAGGGTTCGTGGGTTGAGCCCCACGTTGGGCG                                   |
| tK(CTT)E1  | Hs_Lys1 | 5  | 180567361 | 180567433 | Lys | CTT |     | GCCCGGCTAGCTCAGTCGGTAGAGCATGAGACTCTTAATCTCAGGGTTCGTGGGTTGAGCCCCACGTTGGGCG                                   |
| tK(CTT)E2  | Hs_Lys1 | 5  | 180581657 | 180581585 | Lys | CTT |     | GCCCGGCTAGCTCAGTCGGTAGAGCATGAGACTCTTAATCTCAGGGTTCGTGGGTTGAGCCCCACGTTGGGCG                                   |
| tK(TTT)A1  | Hs_Lys1 | 1  | 201207312 | 201207384 | Lys | TTT |     | GCCCGGATAGCTCAGTCGGTAGAGCATCAGACTTTTAATCTGAGGGTCCAGGGTTCAAGTCCCTGTTGCGGGCG                                  |
| tK(TTT)A2  | Hs_Lys1 | 1  | 201207887 | 201207815 | Lys | TTT |     | GCCCGGATAGCTCAGTCGGTAGAGCATCAGACTTTTAATCTGAGGGTCCAGGGTTCAAGTCCCTGTTGCGGGCG                                  |
| tK(TTT)A3  | Hs_Lys1 | 1  | 202174928 | 202175000 | Lys | TTT |     | GCCCGGAGAGCTCAGTGGGTAGAGCATCAGACTTTTAATCTGAGGGTCCAGGGTTCAAGTCCCTGTTGCGGGCA                                  |
| tSUP(TTA)Q | Hs_Lys2 | 17 | 56218375  | 56218445  | Sup | TTA |     | GCCCGGATAGTTTCAAGTCCCTGTTGCGGGCA                                                                            |

|            |         |          |           |           |     |     |     |                                                                                 |
|------------|---------|----------|-----------|-----------|-----|-----|-----|---------------------------------------------------------------------------------|
| tK(TTT)G   | Hs_Lys2 | 7_random | 626926    | 627002    | Lys | TTT |     | GCCCCACGTAGCTCAATGGTCAGAGCGTGCGGCTTTTAAACCGCAAGGAAGGCTGCGAGTTCGACCCTCGCCGTGGGCT |
| tK(TTT)Q   | Hs_Lys2 | 17       | 7963198   | 7963270   | Lys | TTT |     | GCCCCGATAGCTCAGTCGGTAGAGCATCAGACTTTTAACTGAGGGTCCAGGGTTCAAGTCCCTGTTCCGGGCG       |
| tK(TTT)F1  | Hs_Lys2 | 6        | 27410820  | 27410748  | Lys | TTT |     | GCCTGGGTAGCTCAGTCGGTAGAGCATCAGACTTTTAACTGAGGGTCCAGGGTTCAAGTCCCTGTCCAGGGCG       |
| tK(TTT)F2  | Hs_Lys2 | 6        | 27651825  | 27651897  | Lys | TTT |     | ACCTGGGTAGCTCAGTAGGTAGAACATCAGACTTTTAACTGAGGGTCTAGGGTTCAAGTCCCTGTCCAGGGCG       |
| tK(TTT)F3  | Hs_Lys2 | 6        | 27667644  | 27667572  | Lys | TTT |     | GCCTGGATAGCTCAGTCGGTAGAGCATCAGACTTTTAACTGAGGGTCCAGGGTTCAAGTCCCTGTTCCAGGGCG      |
| tK(TTT)F4  | Hs_Lys2 | 6        | 28823500  | 28823572  | Lys | TTT |     | GCCTGGATAGCTCAGTTGGTAGAACATCAGACTTTTAACTGACGGTGCAGGGTTCAAGTCCCTGTTCCAGGGCG      |
| tK(TTT)F5  | Hs_Lys2 | 6        | 29026785  | 29026857  | Lys | TTT |     | GCCCCGATAGCTCAGTCGGTAGAGCATCAGACTTTTAACTGAGGGTCCAGGGTTCAAGTCCCTGTTCCGGGCG       |
| tK(TTT)S   | Hs_Lys2 | 19       | 54729817  | 54729745  | Lys | TTT |     | ACCTGGGTAGCTTAGTTGGTAGAGCATTGGACTTTTAACTTGAAGGGCCAGGTTTCAAGTCCCTGTTTGGGTG       |
| tK(TTT)K1  | Hs_Lys2 | 11       | 59080478  | 59080550  | Lys | TTT |     | GCCCCGATAGCTCAGTCGGTAGAGCATCAGACTTTTAACTGAGGGTCCGGGGTTCAAGTCCCTGTTCCGGGCG       |
| tK(TTT)K2  | Hs_Lys2 | 11       | 59084456  | 59084384  | Lys | TTT |     | GCCCCGATAGCTCAGTCGGTAGAGCATCAGACTTTTAACTGAGGGTCCAGGGTTCAAGTCCCTGTTCCGGGCG       |
| tK(TTT)P   | Hs_Lys2 | 16       | 72069789  | 72069717  | Lys | TTT |     | GCCTGGATAGCTCAGTTGGTAGAGCATCAGACTTTTAACTGAGGGTCCAGGGTTCAAGTCCCTGTTCCAGGCA       |
| tK(TTT)K3  | Hs_Lys2 | 11       | 121935865 | 121935937 | Lys | TTT |     | GCCTGGATAGCTCAGTTGGTAGAGCATCAGACTTTTAACTGAGGGTCCAGGGTTCAAGTCCCTGTTCCAGGGCG      |
| tL(CAA)K   | Hs_Met1 | 11       | 9253366   | 9253439   | Leu | CAA |     | GCCTCCTTAGTGACAGTAGGTAGCGCATCAGTCTCAAATCTGAATGGTCCCTGAGTTCAAGCCTCAGAGGGGGCA     |
| tM(CAT)F4  | Hs_Met1 | 6        | 26809691  | 26809763  | Met | CAT |     | GCCCTCTTAGCGCAGCTGGCAGCGCGTCAGTCTCATAATCTGAAGGTCCTGAGTTCAAGCCTCAGAGAGGGCA       |
| tM(CAT)F5  | Hs_Met1 | 6        | 26843625  | 26843553  | Met | CAT |     | GCCCTCTTAGCGCAGCGGGCAGCGCGTCAGTCTCATAATCTGAAGGTCCTGAGTTCCGAGCCTCAGAGAGGGCA      |
| tM(CAT)F6  | Hs_Met1 | 6        | 26866601  | 26866529  | Met | CAT |     | GCCCTCTTAGCGCAGCGGGCAGCGCGTCAGTCTCATAATCTGAAGGTCCTGAGTTCCGAGCCTCAGAGAGGGCA      |
| tM(CAT)F7  | Hs_Met1 | 6        | 26874423  | 26874495  | Met | CAT |     | GCCCTCTTAGCGCAGCGGGCAGCGCGTCAGTCTCATAATCTGAAGGTCCTGAGTTCCGAGCCTCAGAGAGGGCA      |
| tM(CAT)F12 | Hs_Met1 | 6        | 29020331  | 29020403  | Met | CAT |     | GCCTCCTTAGCGCAGTAGGCAGCGCGTCAGTCTCATAATCTGAAGGTCCTGAGTTCCGAACTCAGAGGGGGCA       |
| tM(CAT)F13 | Hs_Met1 | 6        | 29029093  | 29029021  | Met | CAT |     | GCCTCCTTAGCGCAGTAGGCAGCGCGTCAGTCTCATAATCTGAAGGTCCTGAGTTCCGAACTCAGAGGGGGCA       |
| tM(CAT)F14 | Hs_Met1 | 6        | 58276523  | 58276451  | Met | CAT |     | GCCCTCTTAGTGACAGTGGCAGCGCGTCAGTCTCATAATCTGAAGTCCCTGAGTTCAAGCCTCAGAGAGGGCA       |
| tM(CAT)P1  | Hs_Met1 | 16       | 70017897  | 70017969  | Met | CAT |     | GCCCTCTTAGCGCAGTAGGCAGCGCGTCAGTCTCATAATCTGAAGTCCCTGAGTTCCGAACTCAGAGAGGGCA       |
| tM(CAT)P2  | Hs_Met1 | 16       | 85975201  | 85975129  | Met | CAT |     | GCCTCGTTAGCGCAGTAGGCAGCGCGTCAGTCTCATAATCTGAAGTCCCTGAGTTCCGAGCCTCACACGGGGCA      |
| tM(CAT)H   | Hs_Met1 | 8        | 124238723 | 124238651 | Met | CAT |     | GCCTCGTTAGCGCAGTAGGTAGCGCGTCAGTCTCATAATCTGAAGTCCCTGAGTTCCGATCCTCACACGGGGCA      |
| tM(CAT)F1  | Hs_Met2 | 6        | 26394733  | 26394804  | Met | CAT |     | AGCAGAGTGGCGCAGCGGAAGCGTGCTGGGCCATAAACCAGAGGTCGATGGATCGAAACCATCCTCTGCTA         |
| tM(CAT)F2  | Hs_Met2 | 6        | 26421402  | 26421331  | Met | CAT |     | AGCAGAGTGGCGCAGCGGAAGCGTGCTGGGCCATAAACCAGAGGTCGATGGATCGAAACCATCCTCTGCTA         |
| tM(CAT)F3  | Hs_Met2 | 6        | 26438579  | 26438508  | Met | CAT |     | AGCAGAGTGGCGCAGCGGAAGCGTGCTGGGCCATAAACCAGAGGTCGATGGATCGAAACCATCCTCTGCTA         |
| tM(CAT)F8  | Hs_Met2 | 6        | 27408814  | 27408743  | Met | CAT |     | AGCAGAGTGGCGCAGCGGAAGCGTGCTGGGCCATAAACCAGAGGTCGATGGATCGAAACCATCCTCTGCTA         |
| tM(CAT)F9  | Hs_Met2 | 6        | 27668650  | 27668579  | Met | CAT |     | AGCAGAGTGGCGCAGCGGAAGCGTGCTGGGCCATAAACCAGAGGTCGATGGATCGAAACCATCCTCTGCTA         |
| tM(CAT)F10 | Hs_Met2 | 6        | 27853643  | 27853714  | Met | CAT |     | AGCAGAGTGGCGCAGCGGAAGCGTGCTGGGCCATAAACCAGAGGTCGATGGATCGAAACCATCCTCTGCTA         |
| tM(CAT)F11 | Hs_Met2 | 6        | 27978321  | 27978250  | Met | CAT |     | AGCAGAGTGGCGCAGCGGAAGCGTGCTGGGCCATAAACCAGAGGTCGATGGATCGAAACCATCCTCTGCTA         |
| tM(CAT)Q   | Hs_Met2 | 17       | 78045957  | 78045886  | Met | CAT |     | AGCAGAGTGGCGCAGCGGAAGCGTGCTGGGCCATAAACCAGAGGTCGATGGATCGAAACCATCCTCTGCTA         |
| tM(CAT)A   | Hs_Met2 | 1        | 150456799 | 150456870 | Met | CAT |     | AGCAGAGTGGCGCAGCGGAAGCGTGCTGGGCCATAAACCAGAGGTCGATGGATCGAAACCATCCTCTGCTA         |
| tF(GAA)S   | Hs_Phe  | 19       | 1334433   | 1334361   | Phe | GAA |     | GCCGAAATAGCTCAGTTGGGAGAGCGTTAGACTGAAGATCTAAAGTCCCTGGTTCCGATCCCGGGTTTCGGCA       |
| tF(GAA)F1  | Hs_Phe  | 6        | 28839426  | 28839353  | Phe | GAA |     | GCTGAAATAGCTCAGTTGGGAGAGCGTTAGACTGAAGATCTAAAGTCCCTGGTTCCGATCCCGGGTTTCAGCC       |
| tF(GAA)F2  | Hs_Phe  | 6        | 28840143  | 28840215  | Phe | GAA |     | GCCAAAATTGCTCAGTTGGGAGAGCGTTAGACTGAAGATCTAAAGTCCCTGGTTCCGATCCCGGGTTTCACCA       |
| tF(GAA)F3  | Hs_Phe  | 6        | 28866550  | 28866478  | Phe | GAA |     | GCCGAAATAGCTCAGTTGGGAGAGCGTTAGACTGAAGATCTAAAGTCCCTGGTTCCGATCCCGGGTTTCGGCA       |
| tF(GAA)F4  | Hs_Phe  | 6        | 28883661  | 28883589  | Phe | GAA |     | GCCGAGATAGCTCAGTTGGGAGAGCGTTAGACTGAAGATCTAAAGTCCCTGGTTCAATCCCGGGTTTCGGCA        |
| tF(GAA)F5  | Hs_Phe  | 6        | 28899145  | 28899072  | Phe | GAA |     | GCCGAAATAGCTCAGTTGGGAGAGCGTTAGACCGAAGATCTAAAGTCCCTGGTTCAATCCCGGGTTTCGGCA        |
| tF(GAA)F6  | Hs_Phe  | 6        | 29057500  | 29057428  | Phe | GAA |     | GCCGAAATAGCTCAGTTGGGAGAGCGTTAGACTGAAGATCTAAAGTCCCTGGTTCCGATCCCGGGTTTCGGCA       |
| tF(GAA)K1  | Hs_Phe  | 11       | 59081618  | 59081546  | Phe | GAA |     | GCCGAAATAGCTCAGTTGGGAGAGCGTTAGACTGAAGATCTAAAGTCCCTGGTTCCGATCCCGGGTTTCGGCA       |
| tF(GAA)K2  | Hs_Phe  | 11       | 59090501  | 59090429  | Phe | GAA |     | GCCGAAATAGCTCAGTTGGGAGAGCGTTAGACTGAAGATCTAAAGTCCCTGGTTCCGATCCCGGGTTTCGGCA       |
| tF(GAA)M   | Hs_Phe  | 13       | 93999977  | 93999905  | Phe | GAA |     | GCCGAAATAGCTCAGTTGGGAGAGCGTTAGACTGAAGATCTAAAGTCCCTGGTTCCGATCCCGGGTTTCGGCA       |
| tF(GAA)L   | Hs_Phe  | 12       | 123937341 | 123937269 | Phe | GAA |     | GCCGAAATAGCTCAGTTGGGAGAGCGTTAGACTGAAGATCTAAAGTCCCTGGTTCCGATCCCGGGTTTCGGCA       |
| tP(AGG)P1  | Hs_Pro  | 16       | 3150387   | 3150481   | Pro | AGG | Yes | GGCTCGTTGGTCTAGGGGTATGATTCTCGCTTAGGGTCCGAGAGGTCCTGGTTCCGATCCCGGGTTTCAGCC        |
| tP(AGG)P2  | Hs_Pro  | 16       | 3172707   | 3172636   | Pro | AGG |     | GGCTCGTTGGTCTAGGGGTATGATTCTCGCTTAGGGTCCGAGAGGTCCTGGTTCCGATCCCGGGTTTCAGCC        |
| tP(AGG)P3  | Hs_Pro  | 16       | 3179635   | 3179706   | Pro | AGG |     | GGCTCGTTGGTCTAGGGGTATGATTCTCGCTTAGGGTCCGAGAGGTCCTGGTTCCGATCCCGGGTTTCAGCC        |
| tP(AGG)P4  | Hs_Pro  | 16       | 3181990   | 3182061   | Pro | AGG |     | GGCTCGTTGGTCTAGGGGTATGATTCTCGCTTAGGGTCCGAGAGGTCCTGGTTCCGATCCCGGGTTTCAGCC        |
| tP(AGG)N1  | Hs_Pro  | 14       | 20147406  | 20147335  | Pro | AGG |     | GGCTCGTTGGTCTAGGGGTATGATTCTCGCTTAGGGTCCGAGAGGTCCTGGTTCCGATCCCGGGTTTCAGCC        |
| tP(AGG)N2  | Hs_Pro  | 14       | 20151471  | 20151400  | Pro | AGG |     | GGCTCGTTGGTCTAGGGGTATGATTCTCGCTTAGGGTCCGAGAGGTCCTGGTTCCGATCCCGGGTTTCAGCC        |

|            |         |    |           |           |        |     |                                                                                        |
|------------|---------|----|-----------|-----------|--------|-----|----------------------------------------------------------------------------------------|
| tP(AGG)F   | Hs_Pro  | 6  | 26663477  | 26663548  | Pro    | AGG | GGCTCGTTGGTCTAGGGGTATGATTCTCGCTTAGGGTGCAGAGGTCCCGGGTTCAAATCCCGGACGAGCCC                |
| tP(AGG)K   | Hs_Pro  | 11 | 75624205  | 75624276  | Pro    | AGG | GGCTCGTTGGTCTAGGGGTATGATTCTCGCTTAGGGTGCAGAGGTCCCGGGTTCAAATCCCGGACGAGCCC                |
| tP(AGG)G   | Hs_Pro  | 7  | 128017455 | 128017526 | Pro    | AGG | GGCTCGTTGGTCTAGGGGTATGATTCTCGCTTAGGGTGCAGAGGTCCCGGGTTCAAATCCCGGACGAGCCC                |
| tP(AGG)A   | Hs_Pro  | 1  | 164416454 | 164416383 | Pro    | AGG | GGCTCGTTGGTCTAGGGGTATGATTCTCGCTTAGGGTGCAGAGGTCCCGGGTTCAAATCCCGGACGAGCCC                |
| tP(CGG)P   | Hs_Pro  | 16 | 3162050   | 3162121   | Pro    | CGG | GGCTCGTTGGTCTAGGGGTATGATTCTCGCTTCGGGTGCAGAGGTCCCGGGTTCAAATCCCGGACGAGCCC                |
| tP(CGG)Q   | Hs_Pro  | 17 | 8066947   | 8066876   | Pro    | CGG | GGCTCGTTGGTCTAGGGGTATGATTCTCGCTTCGGGTGCAGAGGTCCCGGGTTCAAATCCCGGACGAGCCC                |
| tP(CGG)F   | Hs_Pro  | 6  | 27167500  | 27167571  | Pro    | CGG | GGCTCGTTGGTCTAGGGGTATGATTCTCGCTTCGGGTGTGAGAGGTCCCGGGTTCAAATCCCGGACGAGCCC               |
| tP(CGG)A   | Hs_Pro  | 1  | 164415620 | 164415691 | Pro    | CGG | GGCTCGTTGGTCTAGGGGTATGATTCTCGCTTCGGGTGCAGAGGTCCCGGGTTCAAATCCCGGACGAGCCC                |
| tP(TGG)P1  | Hs_Pro  | 16 | 3148924   | 3148995   | Pro    | TGG | GGCTCGTTGGTCTAGGGGTATGATTCTCGCTTTGGGTGCAGAGGTCCCGGGTTCAAATCCCGGACGAGCCC                |
| tP(TGG)P2  | Hs_Pro  | 16 | 3174205   | 3174134   | Pro    | TGG | GGCTCGTTGGTCTAGGGGTATGATTCTCGCTTTGGGTGCAGAGGTCCCGGGTTCAAATCCCGGACGAGCCC                |
| tP(TGG)P3  | Hs_Pro  | 16 | 3178095   | 3178166   | Pro    | TGG | GGCTCGTTGGTCTAGGGGTATGATTCTCGCTTTGGGTGCAGAGGTCCCGGGTTCAAATCCCGGACGAGCCC                |
| tP(TGG)N1  | Hs_Pro  | 14 | 20171005  | 20171076  | Pro    | TGG | GGCTCGTTGGTCTAGGGGTATGATTCTCGCTTTGGGTGCAGAGGTCCCGGGTTCAAATCCCGGACGAGCCC                |
| tP(TGG)N2  | Hs_Pro  | 14 | 20222015  | 20222086  | Pro    | TGG | GGCTCGTTGGTCTAGGGGTATGATTCTCGCTTTGGGTGCAGAGGTCCCGGGTTCAAATCCCGGACGAGCCC                |
| tP(TGG)K   | Hs_Pro  | 11 | 75624588  | 75624517  | Pro    | TGG | GGCTCGTTGGTCTAGGGGTATGATTCTCGGTTTGGGTCCGAGAGGTCCCGGGTTCAAATCCCGGACGAGCCC               |
| tP(TGG)E   | Hs_Pro  | 5  | 180548531 | 180548460 | Pro    | TGG | GGCTCGTTGGTCTAGGGGTATGATTCTCGCTTTGGGTGCAGAGGTCCCGGGTTCAAATCCCGGACGAGCCC                |
| tSeC(TCA)V | Hs_SeC  | 22 | 42871438  | 42871523  | SeC(e) | TCA | GCTCGGATGATCCTCAGTGGTCTGGGGTGCAGGCTTCAAACCTGTAGCTGTCTAGTGACAGAGTGGTTCAATTCCACCTTTGTAGG |
| tSeC(TCA)S | Hs_SeC  | 19 | 50673785  | 50673700  | SeC(e) | TCA | GCCCGGATGATCCTCAGTGGTCTGGGGTGCAGGCTTCAAACCTGTAGCTGTCTAGCGACAGAGTGGTTCAATTCCACCTTTGCGGC |
| tS(AGA)Q   | Hs_Ser1 | 17 | 8070734   | 8070653   | Ser    | AGA | GTAGTCGTGGCCGAGTGGTTAAGGCGATGGACTAGAAAATCCATTGGGGTCTCCCCGCGCAGGTTTCAATCCTGCCGACTACG    |
| tS(AGA)F1  | Hs_Ser1 | 6  | 26435796  | 26435877  | Ser    | AGA | GTAGTCGTGGCCGAGTGGTTAAGGCGATGGACTAGAAAATCCATTGGGGTCTCCCCGCGCAGGTTTCAATCCTGCCGACTACG    |
| tS(AGA)F2  | Hs_Ser1 | 6  | 27554570  | 27554651  | Ser    | AGA | GTAGTCGTGGCCGAGTGGTTAAGGCGATGGACTAGAAAATCCATTGGGGTCTCCCCGCGCAGGTTTCAATCCTGCCGACTACG    |
| tS(AGA)F3  | Hs_Ser1 | 6  | 27571572  | 27571653  | Ser    | AGA | GTAGTCGTGGCCGAGTGGTTAAGGCGATGGACTAGAAAATCCATTGGGGTCTCCCCGCGCAGGTTTCAATCCTGCCGACTACG    |
| tS(AGA)F4  | Hs_Ser1 | 6  | 27578797  | 27578878  | Ser    | AGA | GTAGTCGTGGCCGAGTGGTTAAGGCGATGGACTAGAAAATCCATTGGGGTCTCCCCGCGCAGGTTTCAATCCTGCCGACTACG    |
| tS(AGA)F5  | Hs_Ser1 | 6  | 27607966  | 27608047  | Ser    | AGA | GTAGTCGTGGCCGAGTGGTTAAGGCGATGGACTAGAAAATCCATTGGGGTCTCCCCGCGCAGGTTTCAATCCTGCCGACTACG    |
| tS(AGA)F6  | Hs_Ser1 | 6  | 27617614  | 27617533  | Ser    | AGA | GTAGTCGTGGCCGAGTGGTTAAGGCGATGGACTAGAAAATCCATTGGGGTCTCCCCGCGCAGGTTTCAATCCTGCCGACTACG    |
| tS(AGA)F7  | Hs_Ser1 | 6  | 27629252  | 27629171  | Ser    | AGA | GTAGTCGTGGCCGAGTGGTTAAGGCGATGGACTAGAAAATCCATTGGGGTCTCCCCGCGCAGGTTTCAATCCTGCCGACTACG    |
| tS(AGA)H   | Hs_Ser1 | 8  | 96351142  | 96351061  | Ser    | AGA | GTAGTCGTGGCCGAGTGGTTAAGGCGATGGACTAGAAAATCCATTGGGGTCTCCCCGCGCAGGTTTCAATCCTGCCGACTACG    |
| tS(CGA)Q   | Hs_Ser1 | 17 | 7983005   | 7982924   | Ser    | CGA | GCTGTGATGGCCGAGTGGTTAAGGCGTTGGACTCGAAAATCCAATGGGGTCTCCCCGCGCAGGTTTCAATCCTGCTCACAGCG    |
| tS(CGA)F1  | Hs_Ser1 | 6  | 27285607  | 27285688  | Ser    | CGA | GCTGTGATGGCCGAGTGGTTAAGGCGTTGGACTCGAAAATCCAATGGGGTCTCCCCGCGCAGGTTTCAAATCCTGCTCACAGCG   |
| tS(CGA)F2  | Hs_Ser1 | 6  | 27748289  | 27748208  | Ser    | CGA | GCTGTGATGGCCGAGTGGTTAAGGCGTTGGACTCGAAAATCCAATGGGGTCTCCCCGCGCAGGTTTCAAATCCTGCTCACAGCG   |
| tS(CGA)L   | Hs_Ser1 | 12 | 54870415  | 54870496  | Ser    | CGA | GTCACGGTGGCCGAGTGGTTAAGGCGTTGGACTCGAAAATCCAATGGGGTCTCCCCGCGCAGGTTTCAATCCTGCTCACAGCG    |
| tS(TGA)F1  | Hs_Ser1 | 6  | 26420884  | 26420803  | Ser    | TGA | GTAGTCGTGGCCGAGTGGTTAAGGCGATGGACTTAAAATCCATTGGGGTCTCCCCGCGCAGGTTTCAATCCTGCCGACTACG     |
| tS(TGA)F2  | Hs_Ser1 | 6  | 27581667  | 27581586  | Ser    | TGA | GTAGTCGTGGCCGAGTGGTTAAGGCGATGGACTTAAAATCCATTGGGGTCTCCCCGCGCAGGTTTCAATCCTGCCGACTACG     |
| tS(TGA)F3  | Hs_Ser1 | 6  | 27621447  | 27621528  | Ser    | TGA | GTAGTCGTGGCCGAGTGGTTAAGGCGATGGACTTAAAATCCATTGGGGTCTCCCCGCGCAGGTTTCAATCCTGCCGACTACG     |
| tS(TGA)J   | Hs_Ser1 | 10 | 69194267  | 69194348  | Ser    | TGA | GCAGCGATGGCCGAGTGGTTAAGGCGTTGGACTTAAAATCCAATGGGGTCTCCCCGCGCAGGTTTCAATCCTGCCGACTACG     |
| tS(GCT)Q   | Hs_Ser2 | 17 | 8030909   | 8030990   | Ser    | GCT | GACGAGGTGGCCGAGTGGTTAAGGCGATGGACTGCTAATCCATTGTGCTCTGCACGCGTGGGTTTCAATCCCACCTCGTCCG     |
| tS(GCT)F1  | Hs_Ser2 | 6  | 26413780  | 26413697  | Ser    | GCT | GGAGAGGCCTGGCCGAGTGGTTAAGGCGATGGACTGCTAATCCATTGTGCTCTGCACGCGTGGGTTTCAATCCCACCTCGTCCG   |
| tS(GCT)F2  | Hs_Ser2 | 6  | 27173064  | 27173145  | Ser    | GCT | GACGAGGTGGCCGAGTGGTTAAGGCGATGGACTGCTAATCCATTGTGCTCTGCACGCGTGGGTTTCAATCCCACCTCGTCCG     |
| tS(GCT)F3  | Hs_Ser2 | 6  | 27373754  | 27373835  | Ser    | GCT | GACGAGGTGGCCGAGTGGTTAAGGCGATGGACTGCTAATCCATTGTGCTCTGCACGCGTGGGTTTCAATCCCACCTCGTCCG     |
| tS(GCT)F4  | Hs_Ser2 | 6  | 28288794  | 28288875  | Ser    | GCT | GACGAGGTGGCCGAGTGGTTAAGGCGATGGACTGCTAATCCATTGTGCTCTGCACGCGTGGGTTTCAATCCCACCTCGTCCG     |
| tS(GCT)F5  | Hs_Ser2 | 6  | 28673177  | 28673096  | Ser    | GCT | GACGAGGTGGCCGAGTGGTTAAGGCGATGGACTGCTAATCCATTGTGCTCTGCACGCGTGGGTTTCAATCCCACCTCGTCCG     |
| tS(GCT)O   | Hs_Ser2 | 15 | 38673396  | 38673315  | Ser    | GCT | GACGAGGTGGCCGAGTGGTTAAGGCGATGGACTGCTAATCCATTGTGCTCTGCACGCGTGGGTTTCAATCCCACCTCGTCCG     |
| tS(GCT)K   | Hs_Ser2 | 11 | 65872167  | 65872248  | Ser    | GCT | GACGAGGTGGCCGAGTGGTTAAGGCGATGGACTGCTAATCCATTGTGCTCTGCACGCGTGGGTTTCAATCCCACCTCGTCCG     |
| tL(TAA)D   | Hs_Ser2 | 4  | 156742657 | 156742583 | Leu    | TAA | GTTAAGATGGCAGAGCCTGGTAATTGCATAAAAATTTTATAATCAGAGGTTCAACTCCTCTTTTAAACA                  |
| tT(AGT)Q1  | Hs_Thr1 | 17 | 7983568   | 7983495   | Thr    | AGT | GGCGCCGTGGCTTAGCTGGTTAAAGCGCCTGTCTAGTAAACAGGAGATCCTGGGTTTCAATCCCAGCGGTGCCT             |
| tT(AGT)Q2  | Hs_Thr1 | 17 | 8031203   | 8031276   | Thr    | AGT | GGCGCCGTGGCTTAGCTGGTTAAAGCGCCTGTCTAGTAAACAGGAGATCCTGGGTTTCAATCCCAGCGGTGCCT             |
| tT(AGT)Q3  | Hs_Thr1 | 17 | 8070351   | 8070278   | Thr    | AGT | GGCGCCGTGGCTTAGCTGGTTAAAGCGCCTGTCTAGTAAACAGGAGATCCTGGGTTTCAATCCCAGCGGTGCCT             |
| tT(AGT)F1  | Hs_Thr1 | 6  | 26641197  | 26641124  | Thr    | AGT | GGCTCCGTGGCTTAGCTGGTTAAAGCGCCTGTCTAGTAAACAGGAGATCCTGGGTTTCAATCCCAGCGGGGCCT             |
| tT(AGT)F2  | Hs_Thr1 | 6  | 27238029  | 27238102  | Thr    | AGT | GGCCCTGTGGCTTAGCTGGTTAAAGCGCCTGTCTAGTAAACAGGAGATCCTGGGTTTCAATCCCAGCGGGGCCT             |
| tT(AGT)F3  | Hs_Thr1 | 6  | 27760526  | 27760453  | Thr    | AGT | GGCTCCGTGGCTTAGCTGGTTAAAGCGCCTGTCTAGTAAACAGGAGATCCTGGGTTTCAATCCCAGCGGGGCCT             |



|           |         |          |           |           |     |     |                                                                                                     |
|-----------|---------|----------|-----------|-----------|-----|-----|-----------------------------------------------------------------------------------------------------|
| tT(AGT)F4 | Hs_Thr1 | 6        | 27802452  | 27802525  | Thr | AGT | GGCTTCGTGGCTTAGCTGGTTAAAGCGCCTGTCTAGTAAACAGGAGATCCTGGGTTTCAATCCCAGCGAGGCCT                          |
| tT(AGT)F5 | Hs_Thr1 | 6        | 28801774  | 28801847  | Thr | AGT | GGCTCCGTAGCTTAGTTGGTTAAAGCGCCTGTCTAGTAAACAGGAGATCCTGGGTTTCAATCCCAGCGGGGCCT                          |
| tT(AGT)S  | Hs_Thr1 | 19       | 38359803  | 38359876  | Thr | AGT | GGCGCCGTGGCTTAGTTGGTTAAAGCGCCTGTCTAGTAAACAGGAGATCCTGGGTTTCAATCCCAGCGGTGCCT                          |
| tT(CGT)P  | Hs_Thr1 | 16       | 14287251  | 14287322  | Thr | CGT | GGCGCGGTGGCCAAGTGGTAAGGCGTGGTCTCGTAAACCGAAGATCACGGGTTTCAACCCCGTCCGTGCCT                             |
| tT(CGT)Q  | Hs_Thr1 | 17       | 26901213  | 26901284  | Thr | CGT | GGCGCGGTGGCCAAGTGGTAAGGCGTGGTCTCGTAAACCGAAGATCGCGGGTTTCAACCCCGTCCGTGCCT                             |
| tT(CGT)F2 | Hs_Thr1 | 6        | 28564822  | 28564749  | Thr | CGT | GGCTCTATGGCTTAGTTGGTTAAAGCGCCTGTCTCGTAAACAGGAGATCCTGGGTTTCAATCCCAGTGGGGCCT                          |
| tT(CGT)F3 | Hs_Thr1 | 6        | 28724036  | 28723963  | Thr | CGT | GGCTCTGTGGCTTAGTTGGCTAAAGCGCCTGTCTCGTAAACAGGAGATCCTGGGTTTCAATCCCAGCGGGGCCT                          |
| tT(TGT)F  | Hs_Thr1 | 6        | 28550381  | 28550308  | Thr | TGT | GGCTCTATGGCTTAGTTGGTTAAAGCGCCTGTCTTGTAAACAGGAGATCCTGGGTTTCAATCCCAGTAGAGCCT                          |
| tT(CGT)F1 | Hs_Thr2 | 6        | 27694114  | 27694187  | Thr | CGT | GGCCCTGTAGCTCAGCGGTTGGAGCGCTGGTCTCGTAAACCTAGGGGTCGTGAGTTCAAATCTCACCAGGGCCT                          |
| tT(TGT)A1 | Hs_Thr2 | 1_random | 1654722   | 1654794   | Thr | TGT | GGTCCATAGCTCAGTGGTTAGAGCACTGGTCTTGTAAACCAGGGGTCGCGAGTTTCGATCCTCGCTGGGGCCT                           |
| tT(TGT)A2 | Hs_Thr2 | 1_random | 2030046   | 2030118   | Thr | TGT | GGTCCATAGCTCAGTGGTTAGAGCACTGGTCTTGTAAACCAGGGGTCGCGAGTTTCGATCCTCGCTGGGGCCT                           |
| tT(TGT)N1 | Hs_Thr2 | 14       | 20151861  | 20151789  | Thr | TGT | GGTCCATAGCTCAGGGGTTAGAGCGCTGGTCTTGTAAACCAGGGGTCGCGAGTTCAAATCTCGCTGGGGCCT                            |
| tT(TGT)N2 | Hs_Thr2 | 14       | 20169231  | 20169159  | Thr | TGT | GGTCCATAGCTCAGGGGTTAGAGCACTGGTCTTGTAAACCAGGGGTCGCGAGTTCAAATCTCGCTGGGGCCT                            |
| tT(TGT)N3 | Hs_Thr2 | 14       | 20219689  | 20219761  | Thr | TGT | GGCCCTATAGCTCAGGGGTTAGAGCACTGGTCTTGTAAACCAGGGGTCGCGAGTTCAAATCTCGCTGGGGCCT                           |
| tT(TGT)E  | Hs_Thr2 | 5        | 180551364 | 180551293 | Thr | TGT | GGTCCATAGCTCAGGGGTTAGAGCACTGGTCTTGTAAACCAGGGGTCGCGAGTTCAAATCTCGCTGGGGCCT                            |
| tT(TGT)A  | Hs_Thr2 | 1        | 219026742 | 219026814 | Thr | TGT | GGTCCATAGCTCAGTGGTTAGAGCACTGGTCTTGTAAACCAGGGGTCGCGAGTTTCGATCCTCGCTGGGGCCT                           |
| tW(CCA)Q1 | Hs_Trp  | 17       | 8030401   | 8030472   | Trp | CCA | GACCTCGTGGCGCAACGGTAGCGCGTCTGACTCCAGATCAGAAGGTTGCGTGTTCAAATCACGTCGGGGTCA                            |
| tW(CCA)Q2 | Hs_Trp  | 17       | 8064983   | 8064912   | Trp | CCA | GGCCTCGTGGCGCAACGGTAGCGCGTCTGACTCCAGATCAGAAGGTTGCGTGTTCAAATCACGTCGGGGTCA                            |
| tW(CCA)Q3 | Hs_Trp  | 17       | 19352086  | 19352157  | Trp | CCA | GACCTCGTGGCGCAATGGTAGCGCGTCTGACTCCAGATCAGAAGGTTGCGTGTTCAAATCACGTCGGGGTCA                            |
| tW(CCA)F1 | Hs_Trp  | 6        | 26427380  | 26427309  | Trp | CCA | GACCTCGTGGCGCAACGGTAGCGCGTCTGACTCCAGATCAGAAGGTTGCGTGTTCAAATCACGTCGGGGTCA                            |
| tW(CCA)F2 | Hs_Trp  | 6        | 26439722  | 26439651  | Trp | CCA | GACCTCGTGGCGCAACGGTAGCGCGTCTGACTCCAGATCAGAAGGTTGCGTGTTCAAATCACGTCGGGGTCA                            |
| tW(CCA)L  | Hs_Trp  | 12       | 97400498  | 97400569  | Trp | CCA | GACCTCGTGGCGCAACGGTAGCGCGTCTGACTCCAGATCAGAAGGTTGCGTGTTCGAATCACGTCGGGGTCA                            |
| tW(CCA)G  | Hs_Trp  | 7        | 98711958  | 98712029  | Trp | CCA | GACCTCGTGGCGCAACGGCAGCGCTCTGACTCCAGATCAGAAGGTTGCGTGTTCAAATCACGTCGGGGTCA                             |
| tY(ATA)B  | Hs_Tyr  | 2        | 218936055 | 218936147 | Tyr | ATA | Yes CTTCAATAGTTTCACTGGTAGAGCAGAGGACTATAGCTACTTCCCTCAGTAGGAGACGTCCTTAGGTTGCTGGTTTCGATTCCAGCTTGAAGGA  |
| tY(GTA)N1 | Hs_Tyr  | 14       | 20191191  | 20191098  | Tyr | GTA | Yes CCTTCGATAGCTCAGCTGGTAGAGCGGAGGACTGTAGCCTGTAGAAACATTTGTGGACATCCTTAGGTCGCTGGTTTCGATTCCGGCTCGAAGGA |
| tY(GTA)N2 | Hs_Tyr  | 14       | 20195556  | 20195463  | Tyr | GTA | Yes CCTTCGATAGCTCAGCTGGTAGAGCGGAGGACTGTAGATTGTATAGACATTTGCGGACATCCTTAGGTCGCTGGTTTCGATTCCAGCTCGAAGGA |
| tY(GTA)N3 | Hs_Tyr  | 14       | 20198050  | 20197957  | Tyr | GTA | Yes CCTTCGATAGCTCAGCTGGTAGAGCGGAGGACTGTAGACTGCGGAAACGTTTGTGGACATCCTTAGGTCGCTGGTTTCGATTCCGGCTCGAAGGA |
| tY(GTA)N4 | Hs_Tyr  | 14       | 20201284  | 20201191  | Tyr | GTA | Yes CCTTCGATAGCTCAGCTGGTAGAGCGGAGGACTGTAGATTGTACAGACATTTGCGGACATCCTTAGGTCGCTGGTTTCGATTCCGGCTCGAAGGA |
| tY(GTA)N5 | Hs_Tyr  | 14       | 20221272  | 20221360  | Tyr | GTA | Yes CCTTCGATAGCTCAGCTGGTAGAGCGGAGGACTGTAGTACTTAATGTGTGGTTCATCCTTAGGTCGCTGGTTTCGATTCCGGCTCGAAGGA     |
| tY(GTA)F1 | Hs_Tyr  | 6        | 26677065  | 26677155  | Tyr | GTA | Yes CCTTCGATAGCTCAGTTGGTAGAGCGGAGGACTGTAGTTGGCTGTGTCTTAGACATCCTTAGGTCGCTGGTTTCGAAATCCGGCTCGAAGGA    |
| tY(GTA)F2 | Hs_Tyr  | 6        | 26683777  | 26683866  | Tyr | GTA | Yes CTTTCGATAGCTCAGTTGGTAGAGCGGAGGACTGTAGGTTTCAATAAAGGCATCCTTAGGTCGCTGGTTTCGAAATCCGGCTCGAAGGA       |
| tY(GTA)F3 | Hs_Tyr  | 6        | 26685311  | 26685399  | Tyr | GTA | Yes CCTTCGATAGCTCAGTTGGTAGAGCGGAGGACTGTAGGCTCATTAAAGCAAGGTATCCTTAGGTCGCTGGTTTCGAAATCCGGCTCGGAGGA    |
| tY(GTA)F4 | Hs_Tyr  | 6        | 26703081  | 26703169  | Tyr | GTA | Yes CCTTCGATAGCTCAGCTGGTAGAGCGGAGGACTGTAGGGGTTTGAATGTGGTTCATCCTTAGGTCGCTGGTTTCGAAATCCGGCTCGGAGGA    |
| tY(GTA)B  | Hs_Tyr  | 2        | 27185301  | 27185389  | Tyr | GTA | Yes CCTTCGATAGCTCAGTTGGTAGAGCGGAGGACTGTAGTGGATAGGGCGTGGCAATCCTTAGGTCGCTGGTTTCGATTCCGGCTCGAAGGA      |
| tY(GTA)H1 | Hs_Tyr  | 8        | 66772173  | 66772086  | Tyr | GTA | Yes TCTTCAATAGCTCAGCTGGTAGAGCGGAGGACTGTAGGTGCACGCCCGTGGCCATTCTTAGGTTGCTGGTTTGAATCCGACTTGGAGAG       |
| tY(GTA)H2 | Hs_Tyr  | 8        | 67188156  | 67188248  | Tyr | GTA | Yes CCTTCGATAGCTCAGCTGGTAGAGCGGAGGACTGTAGCTACTTCCCTCAGCAGGAGACATCCTTAGGTCGCTGGTTTCGATTCCGGCTCGAAGGA |
| tY(GTA)H3 | Hs_Tyr  | 8        | 67188777  | 67188865  | Tyr | GTA | Yes CCTTCGATAGCTCAGCTGGTAGAGCGGAGGACTGTAGGCGCGCGCCCGTGGCCATCCTTAGGTCGCTGGTTTCGATTCCGGCTCGAAGGA      |
| tV(AAC)F1 | Hs_Val  | 6        | 27311267  | 27311339  | Val | AAC | GTTTCCGTAGTGTAGTGGTTATCACGTTTGCCTAACACGCGAAAGGTCCCCGGTTTCAAAACCGGGCAGAAACA                          |
| tV(AAC)F2 | Hs_Val  | 6        | 27726758  | 27726686  | Val | AAC | GTTTCCGTAGTGTAGTGGTTATCACGTTTGCCTAACACGCGAAAGGTCCCTGGATCAAAACCGGGCAGAAACA                           |
| tV(AAC)F3 | Hs_Val  | 6        | 27756936  | 27756864  | Val | AAC | GTTTCCGTAGTGTAGTGGTTATCACGTTTGCCTAACACGCGAAAGGTCCCGGTTTCAAAACCGGGCAGAAACA                           |
| tV(AAC)F4 | Hs_Val  | 6        | 27829230  | 27829158  | Val | AAC | GTTTCCGTAGTGTAGTGGTTATCACGTTTGCCTAACACGCGAAAGGTCCCCGGTTTCAAAACCGGGCAGAAACA                          |
| tV(AAC)C  | Hs_Val  | 3        | 170972720 | 170972792 | Val | AAC | GTTTCCGTAGTGTAGTGGTTATCACGTTTGCCTAACACGCGAAAGGTCCCCGGTTTCAAAACCGGGCAGAAACA                          |
| tV(AAC)E1 | Hs_Val  | 5        | 180523760 | 180523832 | Val | AAC | GTTTCCGTAGTGTAGTGGTTATCACGTTTGCCTAACACGCGAAAGGTCCCCGGTTTCAAAACCGGGCAGAAACA                          |
| tV(AAC)E2 | Hs_Val  | 5        | 180529216 | 180529288 | Val | AAC | GTTTCCGTAGTGTAGTGGTTATCACGTTTGCCTAACACGCGAAAGGTCCCCGGTTTCAAAACCGGGCAGAAACA                          |
| tV(AAC)E3 | Hs_Val  | 5        | 180548094 | 180548022 | Val | AAC | GTTTCCGTAGTGTAGTGGTTATCACGTTTGCCTAACACGCGAAAGGTCCCCGGTTTCAAAACCGGGCAGAAACA                          |
| tV(AAC)E4 | Hs_Val  | 5        | 180577948 | 180577876 | Val | AAC | GTTTCCGTAGTGTAGTGGTTATCACGTTTGCCTAACACGCGAAAGGTCCCCGGTTTCAAAACCGGGCAGAAACA                          |
| tV(CAC)S  | Hs_Val  | 19       | 4675719   | 4675647   | Val | CAC | GTTTCCGTAGTGTAGCGTTATCACATTTCGCTCACACGCGAAAGGTCCCCGGTTTCAATCCCGGGCAGAAACA                           |
| tV(CAC)A1 | Hs_Val  | 1        | 16751879  | 16751807  | Val | CAC | GTTTCTGTGGTGTAGTGGTTATCATGTTTCGCTCACACGAGAAAGTCCCTGATTTCGAGACTGGGTGGGAACG                           |
| tV(CAC)F1 | Hs_Val  | 6        | 26646261  | 26646333  | Val | CAC | GTTTCCGTAGTGTAGTGGTTATCACGTTTGCCTCACACGCGAAAGGTCCCCGGTTTCAAAACCGGGCAGAAACA                          |

|           |        |    |           |           |     |     |                                                                              |
|-----------|--------|----|-----------|-----------|-----|-----|------------------------------------------------------------------------------|
| tV(CAC)F2 | Hs_Val | 6  | 27226001  | 27226073  | Val | CAC | GTTTCTGTAGTATGGTGGTTATCACGTTAGTCTCACACGTGAAAGGTCCCTGGTTCGAAACCAGGTGGAAACA    |
| tV(CAC)F3 | Hs_Val | 6  | 27281918  | 27281846  | Val | CAC | GTTTCCGTAGTGGAGTGGTTATCACGTTTCGCCTCACACGCGAAAGGTCCCCGGTTTGAAACCAGGCGGAAACA   |
| tV(CAC)F4 | Hs_Val | 6  | 27356100  | 27356028  | Val | CAC | GCTTCTGTAGTGTAGTGGTTATCACGTTTCGCCTCACACGCGAAAGGTCCCCGGTTCGAAACCAGGCGGAAACA   |
| tV(CAC)F5 | Hs_Val | 6  | 27804378  | 27804306  | Val | CAC | GTTTCCGTAGTGTAGTGGTTATTATGTTTCGCCTCACACGCGAAAAGTCCCCGGTTCGAAATCAGGCGGAAACA   |
| tV(CAC)A3 | Hs_Val | 1  | 146078219 | 146078147 | Val | CAC | GTTTCCGTAGTGTAGTGGTTATCACGTTTCGCCTCACACGCGAAAGGTCCCCGGTTCGAAACTGGGCGGAAACA   |
| tV(CAC)A4 | Hs_Val | 1  | 146497234 | 146497161 | Val | CAC | GTTTCCGTAGTGTAGTGGTTATCACGTTTCGCCTCACACGCGTAAAGGTCCCCGGTTCGAAACCAGGCGGAAACA  |
| tV(CAC)A5 | Hs_Val | 1  | 158182635 | 158182563 | Val | CAC | GTTTCCGTAGTGTAGTGGTTATCACGTTTCGCCTCACACGCGAAAGGTCCCCGGTTCGAAACCAGGCGGAAACA   |
| tV(CAC)E1 | Hs_Val | 5  | 180456676 | 180456748 | Val | CAC | GTTTCCGTAGTGTAGTGGTTATCACGTTTCGCCTCACACGCGAAAGGTCCCCGGTTCGAAACCAGGCGGAAACA   |
| tV(CAC)E2 | Hs_Val | 5  | 180461931 | 180461859 | Val | CAC | GTTTCCGTAGTGTAGTGGTTATCACGTTTCGCCTCACACGCGAAAGGTCCCCGGTTCGAAACCAGGCGGAAACA   |
| tV(CAC)E3 | Hs_Val | 5  | 180533256 | 180533328 | Val | CAC | GTTTCCGTAGTGTAGTGGTTATCACGTTTCGCCTCACACGCGAAAGGTCCCCGGTTCGAAACCAGGCGGAAACA   |
| tV(CAC)E4 | Hs_Val | 5  | 180582073 | 180582001 | Val | CAC | GTTTCCGTAGTGTAGTGGTTATCACGTTTCGCCTCACACGCGAAAGGTCCCCGGTTCGAAACCAGGCGGAAACA   |
| tV(TAC)J  | Hs_Val | 10 | 5935752   | 5935680   | Val | TAC | GGTTCATAGTGTAGTGGTTATCACATCTGCTTTACACGCAGAAGGTCCCTGGGTTCAAGCCCCAGTGGAACCA    |
| tV(TAC)X  | Hs_Val | X  | 18452758  | 18452686  | Val | TAC | GGTTCATAGTGTAGTGGTTATCACGTTCTGCTTTACACGCAGAAGGTCCCTGGGTTTCGAGCCCCAGTGGAACCA  |
| tV(TAC)F  | Hs_Val | 6  | 27366384  | 27366456  | Val | TAC | GTTTCCGTGGTGTAGTGGTTATCACATTTCGCCTTACACGCGAAAGGTCCCTCGGGTTCGAAACCAGGCGGAAACA |
| tV(TAC)K1 | Hs_Val | 11 | 59074750  | 59074678  | Val | TAC | GGTTCATAGTGTAGTGGTTATCACGTTCTGCTTTACACGCAGAAGGTCCCTGGGTTTCGAGCCCCAGTGGAACCA  |
| tV(TAC)K2 | Hs_Val | 11 | 59075108  | 59075036  | Val | TAC | GGTTCATAGTGTAGCGGTTATCACGTTCTGCTTTACACGCAGAAGGTCCCTGGGTTTCGAGCCCCAGTGGAACCA  |
| tV(CAC)A2 | Hs_Val | 1  | 146074328 | 146074258 | Val | CAC | GCACTGGTGGTTCAGTGGTAGAATTCTCGCCTCACACGCGGGACACCCGGGTTCAATTCCCGGTCAAGGCA      |

Figure S\_4

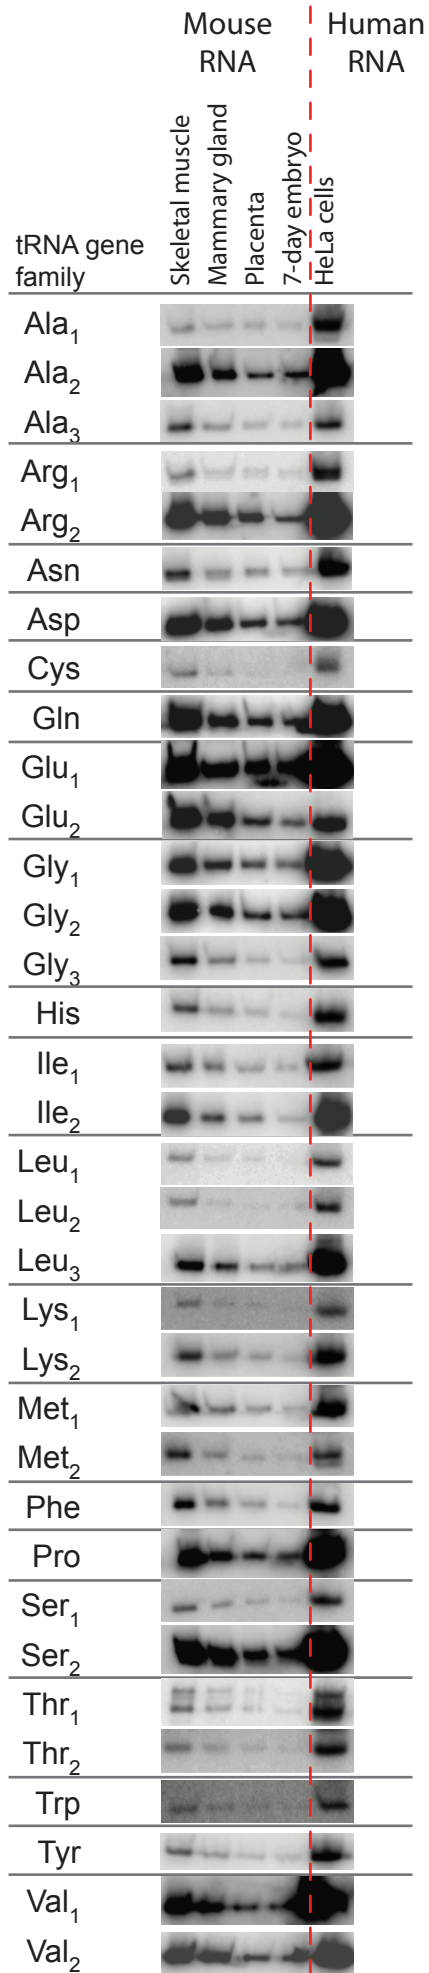

Supplemental Figure S5

Figure S\_6 - Structure of intron-containing orphan tRNAs

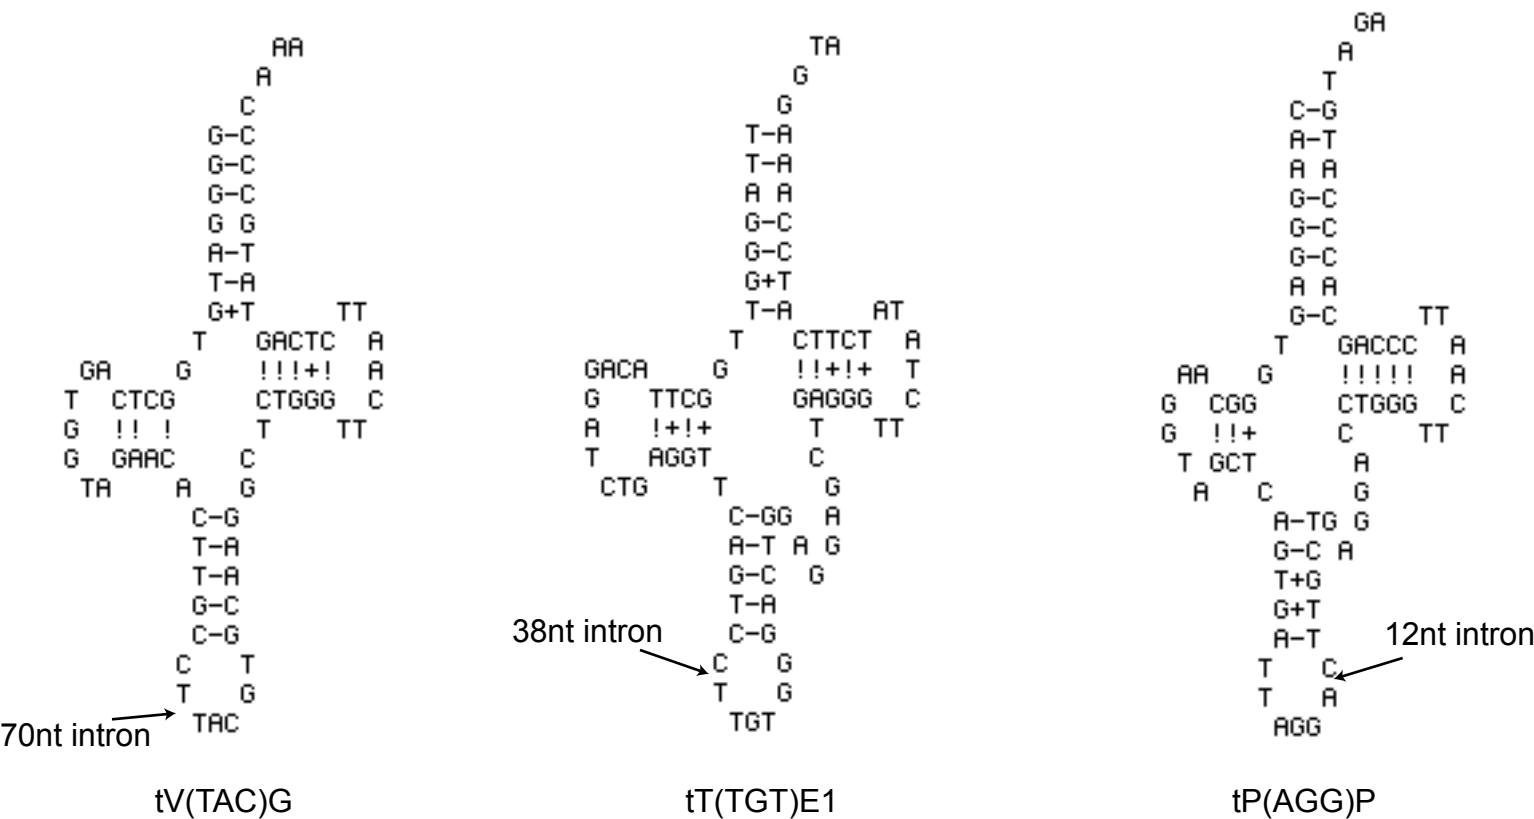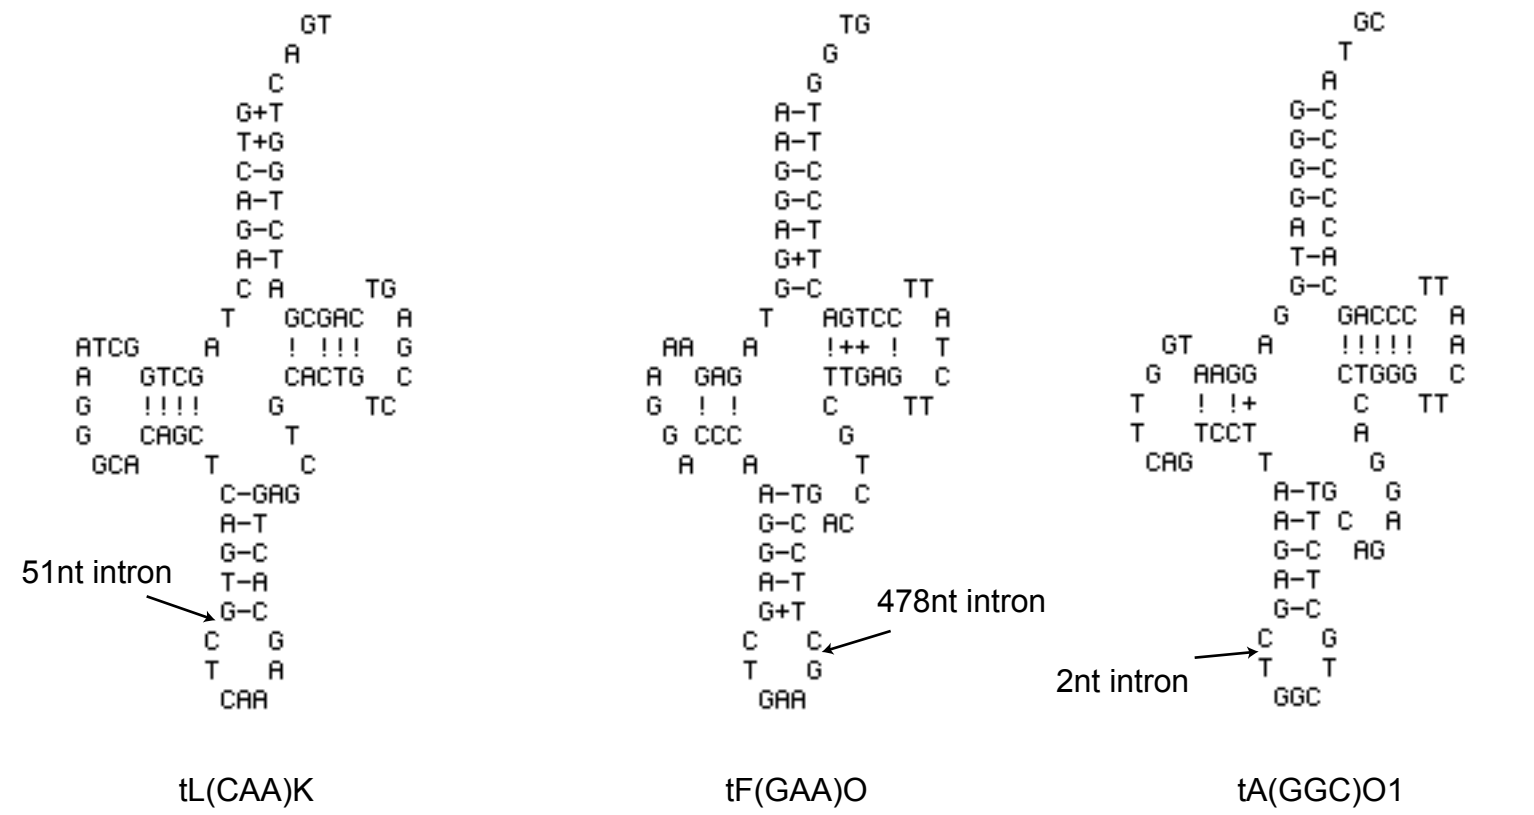

Figure S\_7

**Mouse**  
tY(GTA)B

G G T A A A A T G G C T G A G T A A - G C A T T A G A C T G T A A A T C T A A A C A C A G A G G T T A A A A T C C T C T T T T T A C C A

**Human**

Chr2:203192880-203192945

G G T A A A A T G G C T G A G C - A A G C A T T A G A C T G T A A A T C T A A A G A C A G A G G T T A A - G G C C T C T T T T T A C C A

Chr8:112015955-112016020

G G T A A A A T G G C T G A G T - A A A C A T T A G A C T G C A A A T C T G A A G A T G G A G G T T A A - G G C C T C T T T T T A C C A

Chr2:131858123-131858187

G G T A A A A T G G C T G A G T - A A G C A T T A G A C T G T A A - T C T G A A A A C A G A G G T C A A - G A C C T C T T T T T A C C A

Chr7:68436566-68436632

G G T A A A A T G G C T G A G C - A A G C A T T A G A C T G T A A A T C T G A A A A C A G A G G T C A A A G G T C T C T T T T T A C C A

Chr1:556239-556304

G G T A A A A T G G C T G A G T G A A G C A T T G G A C T G T A A A T C T A A A G A C A G G G G T T A A G - - C C T C T T T T T A C C A

ChrM:5827-5892

G G T A A A A T G G C T G A G T G A A G C A T T G G A C T G T A A A T C T A A A G A C A G G G G T T A G G - - C C T C T T T T T A C C A

Chr14:32023770-32023835

G G T A A A A T G G C T G A G T G A A G C A T T G G A C T G T A A A T C T A A A G A C A G G G G C T A A G - - C C T C T T T T T A C C A

Chr21\_random:928111-928176

G G T A A A A T G G C T G A G T G A A G C A T T G G A C T G T A A A T C T A A A G A C A G G G G T T A A G - - C C T C T T T T T A C C A

Chr2:130747869-130747933

G G T A A A A T G G C T G A G T - A A G C A T T A G A C T G T A A - T C T A A A A A C A G A G A T C A A G A - C C T C T T T T T A C C A

Chr17:19449272-19449337

G G T A A A A T G G C T G A G T - A A G C A T G A G A C T G T A A A T C T A A A G A C A G A G G T C A A G A - C C T C T T T T T A C C A

Chr9:5086587-5086652

G G T A A A A T G G C T G A G T - A A G C A T T G G A C T G T A A A T C T A A A G A C A G A G G T C A A G A - C C T C T T T T T A C C A

Chr2:155828537-155828601

C G T A A A A T G G C T G A G T A A G G C A T T A G A C T G T A A A T C T A A A G A C A G A G G C T A A A - - C C T C T T T T T A C C A

Chr9:82369382-82369445

G G T A A A A T G G C T G A G T A A A G C A T T A G A C T G T A A A T C T A A G G A C A G A G G C T A A A - - C C T C T T T T T A C C A

Chr9:94341302-94341367

G G T A A A A T G G C T G A G T - A A G C A T T A G A C T A T A A A T C T A A A G A C A G A G G T C A A G G - C C T - - T T T T T A C C A

Chr11:102781788-102781853

G G T A A A A T G G C T G A G T - A A G C A T T A G A C T A T A A A T C T A A A G A C A G A G G T C A A G G - C C T C T T T T T A C C A

Chr1:236170998-236171063

G G T A A A A T G A C T G A G T - A A G C A T T A G A C T A T A A A T C T A A A G A C A G A G G T C A A G A - C C T C T T T T T A C C A

Chr2:140691292-140691357

G G T A A A A T G A C T G A G T - A A A C A T T A G A C T G T A A A T C T A A A T A C A G A G G C C A A G G - C C T C T T T T T A C C A

Chr4:156601853-156601914

G G T A A A G T G G C T G A A T - A A G C A T T A G A C T G T A A A T C T A A A G A C A G A G G T C A A G G - C C T C T T T T T A G C A

Chr7:63207978-63208038

G G T A A A A T G G C T G A G T - A A G C A T T A G A C T G T A A A T C T A A A G A C A G A G G T C A A G G - C C T C T T T T T T C C T

Chr7:141148343-141148408

G G T A A A A T G G C T G A G T - A A G C A T T A G A C T G T A A A T C T A A A G A C A G A G G T C A A G G - C C T C T T T T T A C C A
